# Supplementary material for: Duration of androgen deprivation therapy with postoperative radiotherapy for prostate cancer: a comparison of long-course versus short-course androgen deprivation therapy in the RADICALS-HD randomised trial
Source: PubMed Central journal article supplement (PMC7616389; doi:10.1016/s0140-6736(24)00549-x), 2024-05-16
Supplement: EMS197881-supplement-Supplementary_material.pdf [file EMS197881-supplement-Supplementary_material.pdf]

# THE LANCET

## Supplementary appendix

This appendix formed part of the original submission and has been peer reviewed. We post it as supplied by the authors.

Supplement to: Parker CC, Kynaston H, Cook AD, et al. Duration of androgen deprivation therapy with postoperative radiotherapy for prostate cancer: a comparison of long-course versus short-course androgen deprivation therapy in the RADICALS-HD randomised trial. *Lancet* 2024; published online May 16. [https://doi.org/10.1016/S0140-6736\(24\)00549-X](https://doi.org/10.1016/S0140-6736(24)00549-X).

## WebAppendix

Duration of androgen deprivation therapy with postoperative radiotherapy for prostate cancer: a comparison of long-course versus short-course androgen deprivation therapy in the RADICALS-HD randomised trial  
(doi: [10.1016/S0140-6736\(24\)00549-X](https://doi.org/10.1016/S0140-6736(24)00549-X))

## Table of Contents

---

| Page     | Item                                                                             |
|----------|----------------------------------------------------------------------------------|
| 2        | Supplementary Table 1: Subgroup analysis of randomisation stratification factors |
| 3        | Supplementary Table 2: Deaths, by cause                                          |
| 4        | Supplementary Table 3: Serious adverse events, causality and resolution          |
| 5        | Sites contributing to comparison                                                 |
| 8        | Note on ethical approval                                                         |
| Separate | Full site of trials unit staff, site investigators and site staff                |
| Separate | Protocol                                                                         |

---

**Supplementary Table 1: Subgroup analysis of randomisation stratification factors**

| Characteristic             | Short-course ADT<br>n=761 |     | Long-course ADT<br>n=762 |     | Treatment effect |              |       |
|----------------------------|---------------------------|-----|--------------------------|-----|------------------|--------------|-------|
|                            | N                         | Ev  | N                        | Ev  | HR               | 95%CI        | P †   |
| <b>Gleason score</b>       |                           |     |                          |     |                  |              |       |
| <7                         | 61                        | 7   | 53                       | 11  | 2.11             | (0.82, 5.45) | 0.032 |
| 7                          | 484                       | 102 | 490                      | 68  | 0.61             | (0.45, 0.84) |       |
| >7                         | 215                       | 64  | 219                      | 60  | 0.87             | (0.61, 1.24) |       |
| <b>Positive margins</b>    |                           |     |                          |     |                  |              |       |
| Absent                     | 281                       | 68  | 278                      | 54  | 0.78             | (0.55, 1.12) | 0.847 |
| Present                    | 480                       | 106 | 484                      | 85  | 0.75             | (0.57, 1.00) |       |
| <b>Planned RT schedule</b> |                           |     |                          |     |                  |              |       |
| 52.5Gy, 20 fractions       | 145                       | 40  | 148                      | 21  | 0.46             | (0.27, 0.78) | 0.082 |
| 66Gy, 33 fractions         | 604                       | 131 | 600                      | 116 | 0.87             | (0.68, 1.12) |       |
| Other                      | 11                        | 2   | 13                       | 2   | 0.82             | (0.11, 5.84) |       |
| <b>Timing of RT</b>        |                           |     |                          |     |                  |              |       |
| Adjuvant                   | 328                       | 83  | 325                      | 62  | 0.70             | (0.51, 0.98) | 0.483 |
| Salvage                    | 433                       | 91  | 437                      | 77  | 0.82             | (0.60, 1.11) |       |
| <b>Planned ADT</b>         |                           |     |                          |     |                  |              |       |
| GnRH agonist               | 640                       | 154 | 636                      | 118 | 0.73             | (0.58, 0.93) | 0.586 |
| Bicalutamide               | 119                       | 19  | 124                      | 21  | 1.04             | (0.56, 1.94) |       |

† Chi-square test for heterogeneity

**Key**

ADT = Androgen deprivation therapy

GnRH = Gonadotrophin-releasing hormone

Gy = Gray

HR = Hazard Ratio

P = p-value

RT = Radiotherapy

**Supplementary Table 2: Deaths, by cause**

| Cause of death  | Short-course ADT<br>(Deaths=111) |       | Long-course ADT<br>(Deaths=100) |       |
|-----------------|----------------------------------|-------|---------------------------------|-------|
|                 | N                                | (%)   | N                               | (%)   |
| Prostate cancer | 39                               | (36%) | 28                              | (30%) |
| Other cancer    | 26                               | (24%) | 28                              | (30%) |
| Cardio-vascular | 12                               | (11%) | 7                               | (7%)  |
| Other           | 30                               | (28%) | 31                              | (33%) |
| <i>Unknown</i>  | 4                                |       | 6                               |       |

**Supplementary Table 3: Serious adverse events, causality and resolution**

| Item                                                       | Short-course ADT<br>n=761 |       | Long-course ADT<br>n=762 |       | p     |
|------------------------------------------------------------|---------------------------|-------|--------------------------|-------|-------|
|                                                            | N                         | (%)   | N                        | (%)   |       |
| <b>Total SAE reported ‡</b>                                | <b>24</b>                 |       | <b>49</b>                |       |       |
| <b>Total SAR reported ‡</b>                                | <b>7</b>                  |       | <b>20</b>                |       |       |
| <b>Total SUSAR reported ‡</b>                              | <b>0</b>                  |       | <b>7</b>                 |       |       |
| <b>Relatedness to trial treatment after central review</b> |                           |       |                          |       |       |
| Definitely                                                 | 0                         | (0%)  | 7                        | (14%) | 0.309 |
| Probably                                                   | 5                         | (21%) | 6                        | (12%) |       |
| Possibly                                                   | 4                         | (17%) | 6                        | (12%) |       |
| Unlikely                                                   | 3                         | (13%) | 4                        | (8%)  |       |
| Unrelated                                                  | 12                        | (50%) | 26                       | (53%) |       |
| Missing                                                    | 0                         |       | 0                        |       |       |
| <b>Resolution</b>                                          |                           |       |                          |       |       |
| Resolved                                                   | 18                        | (78%) | 37                       | (76%) |       |
| Resolved with sequelae                                     | 3                         | (13%) | 9                        | (18%) |       |
| Ongoing                                                    | 0                         | (0%)  | 2                        | (4%)  |       |
| Fatal <sup>ψ</sup>                                         | 2                         | (9%)  | 1                        | (2%)  |       |
| Missing                                                    | 1                         |       | 0                        |       |       |

‡ No participants had more than one SAE / SAR / SUSAR reported

<sup>ψ</sup> None of the fatal SAEs were reported as related to treatment

**Key**

ADT = Androgen deprivation therapy

SAE = Serious Adverse Event

## Sites contributing to comparison

**Note: Full list of sites participating across RADICALS and their nominated staff follow after the table.**

90 = London, UK: Guy's Hospital  
59 = Bodolwyddan, UK: Glan Clwyd Hospital  
54 = Toronto, Canada: Princess Margaret Hospital  
50 = Copenhagen, Denmark: Rigshospitalet University Hospital  
50 = Sherbrooke, Canada: CIUSSS de l'Estrie - Centre hospitalier universitaire de Sherbrooke  
45 = Ottawa, Canada: Ottawa Health Research Institute  
42 = Winnipeg, Canada: CancerCare Manitoba  
39 = Toronto, Canada: Odette Cancer Centre - Sunnybrook Health Sciences Centre  
30 = Montreal, Canada: CHUM - Hopital Notre-Dame  
28 = Canterbury, UK: Kent and Canterbury Hospital  
27 = Leeds, UK: St James University Hospital  
26 = Coventry, UK: University Hospital Coventry and Warwickshire  
25 = Bradford, UK: Bradford Royal Infirmary  
25 = Exeter, UK: Royal Devon and Exeter Hospital  
25 = Guildford, UK: Royal Surrey County Hospital  
24 = Birmingham, UK: Queen Elizabeth Hospital  
24 = Vancouver, Canada: Vancouver Cancer Centre  
22 = Manchester, UK: Christie Hospital  
22 = Southampton, UK: Southampton General Hospital  
20 = Kingston, Canada: Cancer Centre of Southeastern Ontario at Kingston General Hospital  
20 = Quebec City, Canada: Hotel-Dieu de Quebec  
20 = Shrewsbury, UK: Royal Shrewsbury Hospital  
19 = Wakefield, UK: Pinderfields Hospital  
18 = Romford, UK: Queen's Hospital  
18 = Wolverhampton, UK: New Cross Hospital  
17 = Bath, UK: Royal United Hospital  
17 = London, UK: Charing Cross Hospital  
17 = London, UK: University College Hospital  
17 = Sutton, UK: Royal Marsden Hospital  
16 = Kelowna, Canada: BC Cancer Centre for Southern Interior  
16 = London, UK: Mount Vernon Hospital [Middlesex]  
16 = London, UK: Royal Marsden Hospital  
16 = London, Canada: London Regional Cancer Program [ON]  
16 = Preston, UK: Royal Preston Hospital  
15 = Lincoln, UK: Lincoln County Hospital  
15 = London, UK: St Bartholomews Hospital  
15 = Nottingham, UK: Nottingham University Hospitals  
15 = Taunton, UK: Musgrove Park Hospital  
13 = Bournemouth, UK: Royal Bournemouth Hospital  
13 = Bristol, UK: Bristol Haematology & Oncology Centre  
13 = Salford, UK: Salford Royal Hospital  
13 = Weston-super-Mare, UK: Weston General Hospital  
13 = Wycombe, UK: Wycombe Hospital  
12 = Ayr, UK: Ayr Hospital  
12 = Bangor, UK: Ysbyty Gwynedd  
12 = Birmingham, UK: Birmingham Heartlands Hospital  
12 = York, UK: York District Hospital  
11 = Aarhus, Denmark: Aarhus Kommunehospital  
11 = Aberdeen, UK: Aberdeen Royal Infirmary  
11 = Cardiff, UK: University Hospital of Wales  
11 = London, UK: Croydon University Hospital  
11 = London, UK: Royal Free Hospital  
11 = Norwich, UK: Norfolk and Norwich University Hospital  
11 = Torbay, UK: Torbay District General Hospital

10 = Inverness, UK: Raigmore Hospital  
10 = London, UK: North Middlesex Hospital  
10 = Maidstone, UK: Maidstone Hospital  
10 = Southend, UK: Southend University Hospital  
9 = Oxford, UK: Churchill Hospital  
9 = St Johns, Canada: Dr. H. Bliss Murphy Cancer Centre [NL]  
9 = Trois-Rivieres, Canada: Centre Hospitalier Regional de Trois-Rivieres  
9 = Victoria, Canada: Vancouver Island Cancer Centre  
8 = Blackburn, UK: Royal Blackburn Hospital  
8 = Ipswich, UK: Ipswich Hospital  
8 = Newcastle, UK: Freeman Hospital  
7 = London, UK: Hammersmith Hospital  
7 = London, UK: Whipps Cross University Hospital  
7 = Stoke, UK: Royal Stoke University Hospital  
6 = Berkshire, UK: Royal Berkshire Hospital  
6 = Colchester, UK: Essex County Hospital  
6 = Edinburgh, UK: Western General Hospital  
6 = Glasgow, UK: Beatson West of Scotland Cancer Centre  
6 = Halifax, Canada: Queen Elizabeth II Health Sciences Centre/ Nova Scotia Cancer Centre  
6 = Truro, UK: Royal Cornwall Hospital  
6 = Vancouver, Canada: BC Cancer Agency-Fraser Valley  
6 = Wirral, UK: Clatterbridge Centre for Oncology  
5 = Brighton, UK: Royal Sussex County Hospital  
5 = Kitchener, Canada: Grand River Regional Cancer Centre, Ontario  
5 = London, UK: St Marys Hospital  
5 = Oldham, UK: Royal Oldham Hospital  
5 = Wrexham, UK: Wrexham Maelor Hospital  
4 = Aylesbury, UK: Stoke Mandeville Hospital  
4 = Barrie, Canada: Royal Victoria Hospital  
4 = Bristol, UK: Southmead Hospital  
4 = Cheltenham, UK: Cheltenham General Hospital  
4 = Eastbourne, UK: Eastbourne District General Hospital  
4 = Harlow, UK: Princess Alexandra Hospital  
4 = Hereford, UK: Hereford County Hospital  
4 = Middlesbrough, UK: James Cook University Hospital  
4 = Peterborough, UK: Peterborough District Hospital  
4 = Poole, UK: Poole Hospital  
4 = Warwick, UK: Warwick Hospital  
4 = Yeovil, UK: Yeovil District Hospital  
3 = Belfast, UK: Belfast City Hospital  
3 = Cambridge, UK: Addenbrooke's Hospital  
3 = Chester, UK: Countess of Chester Hospital  
3 = Derby, UK: Royal Derby Hospital  
3 = Herlev, Denmark: Amtssygehuset i Herlev - Herlev University Hospital  
3 = London, UK: St Georges Hospital  
3 = Newport, UK: Royal Gwent Hospital  
3 = Oshawa, Canada: Lakeridge Health  
3 = Stockport, UK: Stepping Hill Hospital  
3 = Worthing, UK: Worthing Hospital  
2 = Airedale, UK: Airedale General Hospital  
2 = Basingstoke, UK: Basingstoke and North Hampshire Hospital  
2 = Crewe, UK: Leighton Hospital  
2 = Galway, Ireland: University College Hospital  
2 = Larbert, UK: Forth Valley Royal Hospital  
2 = Montreal, Canada: Hospital Maisonneuve-Rosemont  
2 = Scunthorpe, UK: Scunthorpe General Hospital  
2 = Slough, UK: Wexham Park Hospital  
2 = Sutton Coldfield, UK: Good Hope Hospital  
2 = Sutton-in-Ashfield, UK: King's Mill Hospital  
2 = Swindon, UK: Great Western Hospital

- 1 = Barnstaple, UK: North Devon District Hospital
- 1 = Brandon, Canada: Western Manitoba Cancer Centre
- 1 = Dudley, UK: Russells Hall Hospital
- 1 = Edmonton, Canada: Cross Cancer Institute [AB]
- 1 = Glasgow, UK: The New Victoria ACH
- 1 = Kidderminster, UK: Kidderminster General Hospital
- 1 = Liverpool, UK: Royal Liverpool University Hospital
- 1 = Northampton, UK: Northampton General Hospital
- 1 = Redditch, UK: Alexandra Hospital



### Note on ethical approval

Each participating country took a different approach to ethics committee approval. This was the standard approach advised for that nation at that time.

| Country | Approach                                                                                                                 |
|---------|--------------------------------------------------------------------------------------------------------------------------|
| UK      | National approval: Health Research Authority's Research Ethics Committees                                                |
| Ireland | (one centre): Galway Clinical Ethics Committee                                                                           |
| Canada  | Hospital by hospital approval, including: Ontario Cancer Research Ethics Board                                           |
| Denmark | One hospital for all: De videnskabetiske komiteer for Region Hovedstaden (The Regional Committee for the Capital Region) |

---

# **RADICALS OVERSIGHT COMMITTEES, STAFF AND COLLABORATORS**

**Version: 11-Jul-2023**

## **CONTENTS**

|                                                   |    |
|---------------------------------------------------|----|
| NOTES .....                                       | 2  |
| TRIAL MANAGEMENT GROUP .....                      | 3  |
| INDEPENDENT DATA MONITORING COMMITTEE .....       | 4  |
| TRIAL STEERING COMMITTEE .....                    | 5  |
| TRIALS UNIT STAFF .....                           | 6  |
| INVESTIGATORS AND COLLABORATORS: SITE STAFF ..... | 8  |
| PARTICIPANTS .....                                | 88 |

## **NOTES**

Investigators and site staff are those who have formally appeared at any time on a site's Delegation Logs.

CTU staff are those who have worked on or contributed to the trial any time from the outset until the date of this report.

The independent members of the Independent Data Monitoring Committee and Trial Oversight Committee play an important role in the conduct of the trial.

Industry collaborators are a subset of the people who have worked, on relevant sections, with the trial staff to ensure the trial runs efficiently.

## TRIAL MANAGEMENT GROUP

(Listing only member external to the trials unit or senior staff at the trials unit)

| Area                                                                                    | Status   | Member                                                        | Geography                                          | Role               |
|-----------------------------------------------------------------------------------------|----------|---------------------------------------------------------------|----------------------------------------------------|--------------------|
| Clinical/Surgical<br>~~~<br>~~~<br>~~~<br>~~~<br>~~~<br>~~~<br>~~~<br>~~~<br>~~~<br>~~~ | Current  | Charles Catton                                                | Toronto, Canada                                    | Country Lead       |
|                                                                                         | ~~~      | Noel Clarke                                                   | Manchester, UK                                     |                    |
|                                                                                         | ~~~      | William Cross                                                 | York, UK                                           | Surgical Champion  |
|                                                                                         | ~~~      | Howard Kynaston                                               | Cardiff, UK                                        |                    |
|                                                                                         | ~~~      | John Logue                                                    | Stockport, UK                                      | RT advisor         |
|                                                                                         | ~~~      | Peter Meidahl                                                 | Copenhagen, Denmark                                | Country Lead       |
|                                                                                         | ~~~      | Chris Parker                                                  | Sutton, UK                                         | Chief Investigator |
|                                                                                         | ~~~      | Heather Payne                                                 | London, UK                                         | RT advisor         |
|                                                                                         | ~~~      | Rajendra Persad                                               | Bristol, UK                                        | Surgical Champion  |
|                                                                                         | ~~~      | ~~~                                                           | Fred Saad                                          | Montreal, Canada   |
| ~~~<br>~~~<br>~~~                                                                       | Previous | Kilian Mellon                                                 | Leicester, UK                                      |                    |
|                                                                                         | ~~~      | Chris Morash                                                  | Canada, UK                                         |                    |
|                                                                                         | ~~~      | Garrett Durkan                                                | Galway, Ireland                                    | Country Lead       |
| Nurse specialist                                                                        | Current  | Lorna Bower                                                   |                                                    |                    |
|                                                                                         | ~~~      |                                                               |                                                    |                    |
| ~~~<br>~~~                                                                              | Previous | Jane Gosling<br>Angela Lee                                    |                                                    |                    |
| PPI<br>~~~                                                                              | Current  | Peter Neville<br>Alan Stirling                                |                                                    |                    |
|                                                                                         | ~~~      |                                                               |                                                    |                    |
| ~~~<br>~~~<br>~~~<br>~~~                                                                | Previous | Peter Barton<br>Ian Jamieson<br>Mike Sawkins<br>Jim Stansfeld |                                                    |                    |
| Senior trials units<br>~~~<br>~~~<br>~~~<br>~~~<br>~~~                                  | Current  | Adrian Cook                                                   | MRC CTU at UCL                                     |                    |
|                                                                                         | ~~~      | Max Parmar                                                    | MRC CTU at UCL                                     |                    |
|                                                                                         | ~~~      | Wendy Parulekar                                               | CCTG                                               |                    |
|                                                                                         | ~~~      | Cheryl Pugh                                                   | MRC CTU at UCL                                     |                    |
|                                                                                         | ~~~      | Matthew Sydes                                                 | MRC CTU at UCL                                     |                    |
| ~~~<br>~~~<br>~~~                                                                       | Previous | Claire Amos<br>Silvia Forcat<br>Barbara Uscinska              | MRC CTU at UCL<br>MRC CTU at UCL<br>MRC CTU at UCL |                    |

**Key:** PPI = Patient and public involvement  
RT = Radiotherapy

**Note:** The full list of trials units staff is detailed below in a subsequent section.

**INDEPENDENT DATA MONITORING COMMITTEE**  
(All members independent)

| <b>Member</b>      | <b>Status</b> | <b>Role</b> |
|--------------------|---------------|-------------|
| Murray Brunt       | Current       | Chair 2     |
| Mary Gospodorawicz | Current       | Member      |
| Jim Montie         | ~~~           | ~~~         |
| Cindy Billingham   | ~~~           | ~~~         |
| David Landau       | Previous      | Chair 1     |

**TRIAL STEERING COMMITTEE**  
(Listing only independent members)

| Member           | Status   | Role    |                             |
|------------------|----------|---------|-----------------------------|
| John Chester     | Current  | Chair 4 | MRC CTU Cancer umbrella TSC |
| Emma Crosbie     | ~~~      | ~~~     | MRC CTU Cancer umbrella TSC |
| Lucy Kilburn     | ~~~      | ~~~     | MRC CTU Cancer umbrella TSC |
| Richard Stephens | ~~~      | ~~~     | MRC CTU Cancer umbrella TSC |
| Jeremy Whelan    | Previous | Chair 2 | MRC CTU Cancer umbrella TSC |
| Anne Thomas      | ~~~      | Chair 3 | MRC CTU Cancer umbrella TSC |
| Anne Russell     | ~~~      | Member  | MRC CTU Cancer umbrella TSC |
| Judith Bliss     | ~~~      | ~~~     | MRC CTU Cancer umbrella TSC |
| Hisham Mehanna   | ~~~      | ~~~     | MRC CTU Cancer umbrella TSC |
| David Guthrie    | Previous | Chair 1 | MRC CTU Cancer Urology TSC  |
| Stan Dische      | ~~~      | Member  | MRC CTU Cancer Urology TSC  |
| Michael Jewett   | ~~~      | ~~~     | MRC CTU Cancer Urology TSC  |
| John Scholefield | ~~~      | ~~~     | MRC CTU Cancer Urology TSC  |

## TRIALS UNIT STAFF

| Country | Trials Unit    | Role                      | Status   | Name                |
|---------|----------------|---------------------------|----------|---------------------|
| UK      | MRC CTU at UCL | Statistician              | Current  | Adrian Cook         |
| ~~~     | ~~~            | ~~~                       | Previous | Chris Brawley       |
| ~~~     | ~~~            | ~~~                       | ~~~      | Andrew Embleton     |
| ~~~     | ~~~            | ~~~                       | ~~~      | Gordana Jovic       |
| ~~~     | ~~~            | ~~~                       | ~~~      | Rachel Morgan       |
| ~~~     | ~~~            | ~~~                       | ~~~      | Max Parmar          |
| ~~~     | ~~~            | ~~~                       | ~~~      | Matthew Sydes       |
| ~~~     | ~~~            | Clinical Project Manager  | Current  | Cheryl Pugh         |
| ~~~     | ~~~            | ~~~                       | Previous | Claire Amos         |
| ~~~     | ~~~            | ~~~                       | ~~~      | Silvia Forcat       |
| ~~~     | ~~~            | ~~~                       | ~~~      | Barbara Uscinska    |
| ~~~     | ~~~            | Trial Manager             | Previous | Cindy Goldstein     |
| ~~~     | ~~~            | ~~~                       | ~~~      | Claire Murphy       |
| ~~~     | ~~~            | ~~~                       | ~~~      | Dipa Noor           |
| ~~~     | ~~~            | ~~~                       | ~~~      | Holly Pickering     |
| ~~~     | ~~~            | ~~~                       | ~~~      | Carol Roach         |
| ~~~     | ~~~            | ~~~                       | ~~~      | Hannah Sims         |
| ~~~     | ~~~            | Data Manager              | Current  | Christos Maniatis   |
| ~~~     | ~~~            | ~~~                       | Previous | Katherine Beaney    |
| ~~~     | ~~~            | ~~~                       | ~~~      | Katharine Bellenger |
| ~~~     | ~~~            | ~~~                       | ~~~      | Jenna Grabey        |
| ~~~     | ~~~            | ~~~                       | ~~~      | Anna Herasimtschuk  |
| ~~~     | ~~~            | ~~~                       | ~~~      | Paul Patterson      |
| ~~~     | ~~~            | ~~~                       | ~~~      | Helena Ribeiro      |
| ~~~     | ~~~            | ~~~                       | ~~~      | Fatimah Seray-Wurie |
| ~~~     | ~~~            | ~~~                       | ~~~      | Ben Spittle         |
| ~~~     | ~~~            | ~~~                       | ~~~      | Lilian Tsang        |
| ~~~     | ~~~            | DMS PM                    | Current  | Christina Chung     |
| ~~~     | ~~~            | ~~~                       | Previous | Nancy Tappenden     |
| ~~~     | ~~~            | Data Scientist            | Current  | Fatima Mohamed      |
| ~~~     | ~~~            | ~~~                       | Previous | Dominic Hague       |
| ~~~     | ~~~            | ~~~                       | ~~~      | Lindsey Masters     |
| ~~~     | ~~~            | Programmer                | Current  | Preetha Shaji       |
| ~~~     | ~~~            | ~~~                       | Previous | Zaheer Islam        |
| ~~~     | ~~~            | ~~~                       | ~~~      | Mary Rauchenberger  |
| Canada  | CCTG           | Physician Coordinator     | Current  | Wendy Parulekar     |
| ~~~     | ~~~            | ~~~                       | Previous | Ralph Meyer         |
| ~~~     | ~~~            | ~~~                       | ~~~      | Harriet Richardson  |
| ~~~     | ~~~            | Study Coordinator         | Current  | Cathy Davidson      |
| ~~~     | ~~~            | ~~~                       | Previous | Conor Dellar        |
| ~~~     | ~~~            | ~~~                       | ~~~      | Kate Whelan         |
| ~~~     | ~~~            | Clinical Trials Associate | Current  | Karen Richardson    |
| ~~~     | ~~~            | ~~~                       | Previous | Sue Casey           |

## TRIALS UNIT STAFF

| Country | Trials Unit | Role               | Status   | Name           |
|---------|-------------|--------------------|----------|----------------|
| ~~~     | ~~~         | Research Associate | Previous | Mandy Fletcher |
| ~~~     | ~~~         | ~~~                | ~~~      | Karen Murphy   |
| ~~~     | ~~~         | Oracle             | Previous | Teddy Brown    |



## INVESTIGATORS AND COLLABORATORS: SITE STAFF

Staff on site delegation logs

| Country | Site                                              | Names               | Role              |
|---------|---------------------------------------------------|---------------------|-------------------|
| Canada  | Abbotsford, BC: Fraser Valley Cancer Centre       | Anand Karvat        | Site PI           |
| ~~~     | ~~~                                               | Arthur Cheung       | Clinical/Surgical |
| ~~~     | ~~~                                               | Winkle Kwan         | Clinical/Surgical |
| ~~~     | ~~~                                               | Cheryl Carrasco     | Principal CRA     |
| ~~~     | ~~~                                               | Gloria Garrioch     | Principal CRA     |
| ~~~     | ~~~                                               | Janice Jong         | Principal CRA     |
| ~~~     | ~~~                                               | Jen Darker          | Principal CRA     |
| ~~~     | ~~~                                               | Cheryl Carrasco     | Ethics CRA        |
| ~~~     | ~~~                                               | Gloria Garrioch     | Ethics CRA        |
| ~~~     | ~~~                                               | Janice Jong         | Ethics CRA        |
| ~~~     | ~~~                                               | Jen Darker          | Ethics CRA        |
| ~~~     | ~~~                                               | Arlissa Johnson     | Additional CRA    |
| ~~~     | ~~~                                               | Cathy Jackson       | Additional CRA    |
| ~~~     | ~~~                                               | Cheryl Carrasco     | Additional CRA    |
| ~~~     | ~~~                                               | Debbie Jepson       | Additional CRA    |
| ~~~     | ~~~                                               | Donna Mitchell      | Additional CRA    |
| ~~~     | ~~~                                               | Gloria Garrioch     | Additional CRA    |
| ~~~     | ~~~                                               | Janice Jong         | Additional CRA    |
| ~~~     | ~~~                                               | Michael W Braun     | Additional CRA    |
| ~~~     | ~~~                                               | Monica Fourt        | Additional CRA    |
| ~~~     | ~~~                                               | Noelle Baird        | Additional CRA    |
| ~~~     | ~~~                                               | Rosanne Serpanchy   | Additional CRA    |
| ~~~     | ~~~                                               | Sandeep Sandhu      | Additional CRA    |
| ~~~     | ~~~                                               | Sue McIndoe         | Additional CRA    |
| ~~~     | ~~~                                               | Helen Wu            | Pharmacist        |
| Canada  | Barrie, ON: Royal Victoria Regional Health Centre | Christiaan Stevens  | Site PI           |
| ~~~     | ~~~                                               | Adam Gladwish       | Clinical/Surgical |
| ~~~     | ~~~                                               | Frederick Yoon      | Clinical/Surgical |
| ~~~     | ~~~                                               | Gerard Morton       | Clinical/Surgical |
| ~~~     | ~~~                                               | Jason Yu            | Clinical/Surgical |
| ~~~     | ~~~                                               | Kimberley MarshGray | Principal CRA     |
| ~~~     | ~~~                                               | Michele Harris      | Principal CRA     |
| ~~~     | ~~~                                               | Christine DiMarco   | Ethics CRA        |
| ~~~     | ~~~                                               | Kayla Gerrity       | Ethics CRA        |

## INVESTIGATORS AND COLLABORATORS: SITE STAFF

Staff on site delegation logs

| Country | Site                                        | Names                  | Role              |
|---------|---------------------------------------------|------------------------|-------------------|
| ~~~     | ~~~                                         | Caitlin Pascoe         | Additional CRA    |
| ~~~     | ~~~                                         | Cara Murphy            | Additional CRA    |
| ~~~     | ~~~                                         | Ian Ding               | Additional CRA    |
| ~~~     | ~~~                                         | Kayla Gerrity          | Additional CRA    |
| ~~~     | ~~~                                         | Melanie Crawford       | Additional CRA    |
| ~~~     | ~~~                                         | Michele Harris         | Additional CRA    |
| ~~~     | ~~~                                         | Patricia MacIsaac      | Additional CRA    |
| ~~~     | ~~~                                         | Rachelle Beausoleil    | Additional CRA    |
| ~~~     | ~~~                                         | Sujata Pokhrel         | Additional CRA    |
| Canada  | Brandon, MB: Western Manitoba Cancer Centre | Bashir Bashir          | Site PI           |
| ~~~     | ~~~                                         | William Hunter         | Site PI           |
| ~~~     | ~~~                                         | Arbind Dubey           | Clinical/Surgical |
| ~~~     | ~~~                                         | Bashir Bashir          | Clinical/Surgical |
| ~~~     | ~~~                                         | Gokulan Sivananthan    | Clinical/Surgical |
| ~~~     | ~~~                                         | William Hunter         | Clinical/Surgical |
| ~~~     | ~~~                                         | Joelle DuMontier       | Principal CRA     |
| ~~~     | ~~~                                         | Leanne Anderson        | Principal CRA     |
| ~~~     | ~~~                                         | Joelle DuMontier       | Ethics CRA        |
| ~~~     | ~~~                                         | Leanne Anderson        | Ethics CRA        |
| ~~~     | ~~~                                         | Leanne Anderson        | Additional CRA    |
| Canada  | CAHN                                        | Maroie Barkati         | Site PI           |
| ~~~     | ~~~                                         | Carole Lambert         | Clinical/Surgical |
| ~~~     | ~~~                                         | Cynthia Menard         | Clinical/Surgical |
| ~~~     | ~~~                                         | Daniel Tausky          | Clinical/Surgical |
| ~~~     | ~~~                                         | Fred Saad              | Clinical/Surgical |
| ~~~     | ~~~                                         | Guila Delouya          | Clinical/Surgical |
| ~~~     | ~~~                                         | JeanPaul Bahary        | Clinical/Surgical |
| ~~~     | ~~~                                         | MarieClaude Beauchemin | Clinical/Surgical |
| ~~~     | ~~~                                         | Pierre Rousseau        | Clinical/Surgical |
| ~~~     | ~~~                                         | Sophie Lavertu         | Clinical/Surgical |
| ~~~     | ~~~                                         | Adriana Carbonaro      | Principal CRA     |
| ~~~     | ~~~                                         | Alexandra Frazzi       | Principal CRA     |
| ~~~     | ~~~                                         | Chantal Lafleur        | Principal CRA     |
| ~~~     | ~~~                                         | Siew Siew Pan          | Principal CRA     |

## INVESTIGATORS AND COLLABORATORS: SITE STAFF

Staff on site delegation logs

| Country | Site                                 | Names                | Role              |
|---------|--------------------------------------|----------------------|-------------------|
| ~~~     | ~~~                                  | Diane Trudel         | Ethics CRA        |
| ~~~     | ~~~                                  | Mom Phat             | Ethics CRA        |
| ~~~     | ~~~                                  | Chantal Lafleur      | Additional CRA    |
| ~~~     | ~~~                                  | Mom Phat             | Additional CRA    |
| ~~~     | ~~~                                  | Nidale ElSokhn       | Additional CRA    |
| ~~~     | ~~~                                  | Silvine Benth        | Additional CRA    |
| Canada  | Edmonton, AB: Cross Cancer Institute | Brita Danielson      | Site PI           |
| ~~~     | ~~~                                  | Albert Murtha        | Clinical/Surgical |
| ~~~     | ~~~                                  | Don Yee              | Clinical/Surgical |
| ~~~     | ~~~                                  | Jim Rose             | Clinical/Surgical |
| ~~~     | ~~~                                  | John Oliver Amanie   | Clinical/Surgical |
| ~~~     | ~~~                                  | Matthew B Parliament | Clinical/Surgical |
| ~~~     | ~~~                                  | Nadeem Pervez        | Clinical/Surgical |
| ~~~     | ~~~                                  | Nawaid Usmani        | Clinical/Surgical |
| ~~~     | ~~~                                  | Robert Pearcey       | Clinical/Surgical |
| ~~~     | ~~~                                  | Samir Patel          | Clinical/Surgical |
| ~~~     | ~~~                                  | Karen Tracey         | Principal CRA     |
| ~~~     | ~~~                                  | Nirmal Joshi         | Principal CRA     |
| ~~~     | ~~~                                  | Karen Tracey         | Ethics CRA        |
| ~~~     | ~~~                                  | Nirmal Joshi         | Ethics CRA        |
| ~~~     | ~~~                                  | Wanda Churchill      | Ethics CRA        |
| ~~~     | ~~~                                  | Beverly Larson       | Additional CRA    |
| ~~~     | ~~~                                  | Candra Williams      | Additional CRA    |
| ~~~     | ~~~                                  | Carlie Smith         | Additional CRA    |
| ~~~     | ~~~                                  | Debbie Mallett       | Additional CRA    |
| ~~~     | ~~~                                  | Leni Santiago Garcia | Additional CRA    |
| ~~~     | ~~~                                  | Monika Lang          | Additional CRA    |
| ~~~     | ~~~                                  | Nirmal Joshi         | Additional CRA    |
| ~~~     | ~~~                                  | Wanda Churchill      | Additional CRA    |
| ~~~     | ~~~                                  | Shelley Parker       | Pharmacist        |
| ~~~     | ~~~                                  | Carol Borynec        | Other             |
| ~~~     | ~~~                                  | Caroline Shewchuk    | Other             |
| ~~~     | ~~~                                  | Colin Gramlich       | Other             |
| ~~~     | ~~~                                  | Margaret Batz        | Other             |

## INVESTIGATORS AND COLLABORATORS: SITE STAFF

Staff on site delegation logs

| Country | Site                                     | Names               | Role              |
|---------|------------------------------------------|---------------------|-------------------|
| ~~~     | ~~~                                      | Sylvia McCrudden    | Other             |
| Canada  | Halifax, NS: QEII Health Sciences Centre | David Bowes         | Site PI           |
| ~~~     | ~~~                                      | Helmut Hollenhorst  | Site PI           |
| ~~~     | ~~~                                      | Abdulla AlRashdan   | Clinical/Surgical |
| ~~~     | ~~~                                      | David Bowes         | Clinical/Surgical |
| ~~~     | ~~~                                      | Derek Wilke         | Clinical/Surgical |
| ~~~     | ~~~                                      | Nikhilesh Patil     | Clinical/Surgical |
| ~~~     | ~~~                                      | Paul K Joseph       | Clinical/Surgical |
| ~~~     | ~~~                                      | Robert DH Rutledge  | Clinical/Surgical |
| ~~~     | ~~~                                      | Erin Little         | Principal CRA     |
| ~~~     | ~~~                                      | Heather Beaton      | Principal CRA     |
| ~~~     | ~~~                                      | Kendra Dill         | Principal CRA     |
| ~~~     | ~~~                                      | Emily Moffatt       | Ethics CRA        |
| ~~~     | ~~~                                      | Jennifer MacVicar   | Ethics CRA        |
| ~~~     | ~~~                                      | Joan Nieforth       | Ethics CRA        |
| ~~~     | ~~~                                      | Robin Simpson       | Ethics CRA        |
| ~~~     | ~~~                                      | Stevie Dugas        | Ethics CRA        |
| ~~~     | ~~~                                      | Alison Avery        | Additional CRA    |
| ~~~     | ~~~                                      | Angela MacDonald    | Additional CRA    |
| ~~~     | ~~~                                      | Brittany Bond       | Additional CRA    |
| ~~~     | ~~~                                      | Camryn Salzyn       | Additional CRA    |
| ~~~     | ~~~                                      | Connie Zinck        | Additional CRA    |
| ~~~     | ~~~                                      | Donna Sutherland    | Additional CRA    |
| ~~~     | ~~~                                      | Heather Walker      | Additional CRA    |
| ~~~     | ~~~                                      | Jillian McCracken   | Additional CRA    |
| ~~~     | ~~~                                      | Kara Bursey         | Additional CRA    |
| ~~~     | ~~~                                      | Kathy MacIsaac      | Additional CRA    |
| ~~~     | ~~~                                      | Kelsey van der Rijt | Additional CRA    |
| ~~~     | ~~~                                      | Lane Carvery        | Additional CRA    |
| ~~~     | ~~~                                      | Lorrie Yunace       | Additional CRA    |
| ~~~     | ~~~                                      | Lynn Hubley         | Additional CRA    |
| ~~~     | ~~~                                      | Susan Burbridge     | Additional CRA    |
| ~~~     | ~~~                                      | Tanya Yeo           | Additional CRA    |
| ~~~     | ~~~                                      | Tina Rose           | Additional CRA    |

## INVESTIGATORS AND COLLABORATORS: SITE STAFF

Staff on site delegation logs

| Country | Site                                                               | Names               | Role                |
|---------|--------------------------------------------------------------------|---------------------|---------------------|
| ~~~     | ~~~                                                                | Victoria Roberts    | Additional CRA      |
| ~~~     | ~~~                                                                | Claudia Harding     | Pharmacist          |
| ~~~     | ~~~                                                                | June Hodder         | Pharmacy technician |
| ~~~     | ~~~                                                                | Kim BrucePayne      | Other               |
| Canada  | Hamilton, ON: Juravinski Cancer Centre at Hamilton Health Sciences | Thomas B Corbett    | Site PI             |
| ~~~     | ~~~                                                                | Himu Lukka          | Clinical/Surgical   |
| ~~~     | ~~~                                                                | Ian S Dayes         | Clinical/Surgical   |
| ~~~     | ~~~                                                                | Jason W T Wong      | Clinical/Surgical   |
| ~~~     | ~~~                                                                | Malti Behn Patel    | Clinical/Surgical   |
| ~~~     | ~~~                                                                | Susan O Gudelis     | Clinical/Surgical   |
| ~~~     | ~~~                                                                | Theodoros Tsakirdis | Clinical/Surgical   |
| ~~~     | ~~~                                                                | Diane DeRosa        | Principal CRA       |
| ~~~     | ~~~                                                                | Elaine Hill         | Ethics CRA          |
| ~~~     | ~~~                                                                | Yvonne Kinrade      | Ethics CRA          |
| ~~~     | ~~~                                                                | Anne Laughlin       | Additional CRA      |
| ~~~     | ~~~                                                                | Barbara Makepeace   | Additional CRA      |
| ~~~     | ~~~                                                                | Bianca Bier         | Additional CRA      |
| ~~~     | ~~~                                                                | Carmela Oliverio    | Additional CRA      |
| ~~~     | ~~~                                                                | Catherine Bucci     | Additional CRA      |
| ~~~     | ~~~                                                                | Diane DeRosa        | Additional CRA      |
| ~~~     | ~~~                                                                | Linda Nielsen       | Additional CRA      |
| ~~~     | ~~~                                                                | Lynn Marshall       | Additional CRA      |
| ~~~     | ~~~                                                                | Robin Eady          | Additional CRA      |
| Canada  | Kelowna, BC: Cancer Centre for the Southern Interior               | David W Petrik      | Site PI             |
| ~~~     | ~~~                                                                | Mohamed Manji       | Site PI             |
| ~~~     | ~~~                                                                | Bernard Lee         | Clinical/Surgical   |
| ~~~     | ~~~                                                                | David Kim           | Clinical/Surgical   |
| ~~~     | ~~~                                                                | David W Petrik      | Clinical/Surgical   |
| ~~~     | ~~~                                                                | Francois Bachand    | Clinical/Surgical   |
| ~~~     | ~~~                                                                | Juanita Crook       | Clinical/Surgical   |
| ~~~     | ~~~                                                                | Melanie Reed        | Clinical/Surgical   |
| ~~~     | ~~~                                                                | Mohamed Manji       | Clinical/Surgical   |
| ~~~     | ~~~                                                                | Ross Halperin       | Clinical/Surgical   |
| ~~~     | ~~~                                                                | Allana Scarfo       | Principal CRA       |

## INVESTIGATORS AND COLLABORATORS: SITE STAFF

Staff on site delegation logs

| Country | Site                                          | Names                 | Role              |
|---------|-----------------------------------------------|-----------------------|-------------------|
| ~~~     | ~~~                                           | Cherie Bates          | Principal CRA     |
| ~~~     | ~~~                                           | Jeaneen Rudolph       | Principal CRA     |
| ~~~     | ~~~                                           | Jessica Stojcic       | Principal CRA     |
| ~~~     | ~~~                                           | Allana Scarfo         | Ethics CRA        |
| ~~~     | ~~~                                           | Cherie Bates          | Ethics CRA        |
| ~~~     | ~~~                                           | Jeaneen Rudolph       | Ethics CRA        |
| ~~~     | ~~~                                           | Jessica Stojcic       | Ethics CRA        |
| ~~~     | ~~~                                           | Aldyn Overend         | Additional CRA    |
| ~~~     | ~~~                                           | Allana Scarfo         | Additional CRA    |
| ~~~     | ~~~                                           | Brianna Creelman      | Additional CRA    |
| ~~~     | ~~~                                           | Carol Winn            | Additional CRA    |
| ~~~     | ~~~                                           | Cherie Bates          | Additional CRA    |
| ~~~     | ~~~                                           | Danielle GeorgeChayka | Additional CRA    |
| ~~~     | ~~~                                           | Debbie Opitz          | Additional CRA    |
| ~~~     | ~~~                                           | Flo Kronstal          | Additional CRA    |
| ~~~     | ~~~                                           | Janet Yanchuk         | Additional CRA    |
| ~~~     | ~~~                                           | Jeaneen Rudolph       | Additional CRA    |
| ~~~     | ~~~                                           | Karen Wilkie          | Additional CRA    |
| ~~~     | ~~~                                           | Kirsten Allen         | Additional CRA    |
| ~~~     | ~~~                                           | Marie McClelland      | Additional CRA    |
| ~~~     | ~~~                                           | Michaela Watson       | Additional CRA    |
| ~~~     | ~~~                                           | Nancy Hartt           | Additional CRA    |
| ~~~     | ~~~                                           | Shannon Cotts         | Additional CRA    |
| ~~~     | ~~~                                           | Layton Carefoot       | Pharmacist        |
| ~~~     | ~~~                                           | TuongVan Kim          | Pharmacist        |
| ~~~     | ~~~                                           | Jill A Hayes          | Other             |
| ~~~     | ~~~                                           | Tanya Lew             | Other             |
| Canada  | Kingston, ON: Kingston Health Sciences Centre | Khaled O Zaza         | Site PI           |
| ~~~     | ~~~                                           | Aamer Mahmud          | Clinical/Surgical |
| ~~~     | ~~~                                           | Carey Shenfield       | Clinical/Surgical |
| ~~~     | ~~~                                           | Maria Kalyvas         | Clinical/Surgical |
| ~~~     | ~~~                                           | Michael Brundage      | Clinical/Surgical |
| ~~~     | ~~~                                           | Vikaash Kumar         | Clinical/Surgical |
| ~~~     | ~~~                                           | Amber Burley          | Principal CRA     |

## INVESTIGATORS AND COLLABORATORS: SITE STAFF

Staff on site delegation logs

| Country | Site | Names               | Role           |
|---------|------|---------------------|----------------|
| ~~~     | ~~~  | Carrie Lindsay      | Principal CRA  |
| ~~~     | ~~~  | Fred Zeltser        | Principal CRA  |
| ~~~     | ~~~  | Jessica Ferguson    | Principal CRA  |
| ~~~     | ~~~  | Amber Burley        | Ethics CRA     |
| ~~~     | ~~~  | Angel Zhou          | Ethics CRA     |
| ~~~     | ~~~  | Ashlee Young        | Ethics CRA     |
| ~~~     | ~~~  | Carrie Lindsay      | Ethics CRA     |
| ~~~     | ~~~  | Chloe Sutton        | Ethics CRA     |
| ~~~     | ~~~  | Cindy Carlson       | Ethics CRA     |
| ~~~     | ~~~  | Deborah Leach       | Ethics CRA     |
| ~~~     | ~~~  | Denise KirbyBello   | Ethics CRA     |
| ~~~     | ~~~  | Heather Doucette    | Ethics CRA     |
| ~~~     | ~~~  | James Medd          | Ethics CRA     |
| ~~~     | ~~~  | Jennifer Pritchard  | Ethics CRA     |
| ~~~     | ~~~  | Jessica Ferguson    | Ethics CRA     |
| ~~~     | ~~~  | Karen MacVicar      | Ethics CRA     |
| ~~~     | ~~~  | Kristina Carmichael | Ethics CRA     |
| ~~~     | ~~~  | Noureen Hassan      | Ethics CRA     |
| ~~~     | ~~~  | Rhonda Harpell      | Ethics CRA     |
| ~~~     | ~~~  | Stephanie Raposo    | Ethics CRA     |
| ~~~     | ~~~  | Tracy Vermette      | Ethics CRA     |
| ~~~     | ~~~  | Abby Murano         | Additional CRA |
| ~~~     | ~~~  | Angel Zhou          | Additional CRA |
| ~~~     | ~~~  | Ashlee Young        | Additional CRA |
| ~~~     | ~~~  | Carrie Hartman      | Additional CRA |
| ~~~     | ~~~  | Carrie Lindsay      | Additional CRA |
| ~~~     | ~~~  | Chloe Sutton        | Additional CRA |
| ~~~     | ~~~  | Christine Maize     | Additional CRA |
| ~~~     | ~~~  | Craig Spencer       | Additional CRA |
| ~~~     | ~~~  | Hala ElKerdawy      | Additional CRA |
| ~~~     | ~~~  | Heather Doucette    | Additional CRA |
| ~~~     | ~~~  | Jackie Edwards      | Additional CRA |
| ~~~     | ~~~  | James Medd          | Additional CRA |
| ~~~     | ~~~  | Jennifer Pritchard  | Additional CRA |

## INVESTIGATORS AND COLLABORATORS: SITE STAFF

Staff on site delegation logs

| Country | Site                                                                  | Names                | Role              |
|---------|-----------------------------------------------------------------------|----------------------|-------------------|
| ~~~     | ~~~                                                                   | Jessica Ferguson     | Additional CRA    |
| ~~~     | ~~~                                                                   | Kristina Carmichael  | Additional CRA    |
| ~~~     | ~~~                                                                   | Nancy Paul           | Additional CRA    |
| ~~~     | ~~~                                                                   | Noureen Hassan       | Additional CRA    |
| ~~~     | ~~~                                                                   | Stephanie Raposo     | Additional CRA    |
| ~~~     | ~~~                                                                   | Stephanie Willing    | Additional CRA    |
| ~~~     | ~~~                                                                   | Virginia Tennant     | Additional CRA    |
| ~~~     | ~~~                                                                   | Yvonne Moelker       | Additional CRA    |
| ~~~     | ~~~                                                                   | Marleen RossSmith    | Pharmacist        |
| ~~~     | ~~~                                                                   | Ashley Ross          | Other             |
| ~~~     | ~~~                                                                   | Mike Brander         | Other             |
| ~~~     | ~~~                                                                   | Scott Bonner         | Other             |
| Canada  | Kitchener, ON: Grand River Regional Cancer Centre at Grand River Hosp | Joda Kuk             | Site PI           |
| ~~~     | ~~~                                                                   | Darindra Gopaul      | Clinical/Surgical |
| ~~~     | ~~~                                                                   | Jochen Knackstedt    | Clinical/Surgical |
| ~~~     | ~~~                                                                   | Ramana Rachakonda    | Clinical/Surgical |
| ~~~     | ~~~                                                                   | Ronald Hamilton      | Clinical/Surgical |
| ~~~     | ~~~                                                                   | Elyse Wellhauser     | Principal CRA     |
| ~~~     | ~~~                                                                   | Kelly Walker         | Principal CRA     |
| ~~~     | ~~~                                                                   | Kristin Krokoszynski | Principal CRA     |
| ~~~     | ~~~                                                                   | Susan Janke          | Principal CRA     |
| ~~~     | ~~~                                                                   | Carol Ballantyne     | Ethics CRA        |
| ~~~     | ~~~                                                                   | Anissa Mumin         | Additional CRA    |
| ~~~     | ~~~                                                                   | Atif Siddiqui        | Additional CRA    |
| ~~~     | ~~~                                                                   | Brenda S Shantz      | Additional CRA    |
| ~~~     | ~~~                                                                   | Carla Girolametto    | Additional CRA    |
| ~~~     | ~~~                                                                   | Carol Ballantyne     | Additional CRA    |
| ~~~     | ~~~                                                                   | Debra Hendel         | Additional CRA    |
| ~~~     | ~~~                                                                   | Elyse Wellhauser     | Additional CRA    |
| ~~~     | ~~~                                                                   | Jennifer Gearing     | Additional CRA    |
| ~~~     | ~~~                                                                   | Kelly Walker         | Additional CRA    |
| ~~~     | ~~~                                                                   | Kristin Krokoszynski | Additional CRA    |
| ~~~     | ~~~                                                                   | MaryBeth Morrison    | Additional CRA    |
| ~~~     | ~~~                                                                   | Sheeba Thallury      | Additional CRA    |



## INVESTIGATORS AND COLLABORATORS: SITE STAFF

Staff on site delegation logs

| Country | Site                                                                            | Names                | Role              |
|---------|---------------------------------------------------------------------------------|----------------------|-------------------|
| ~~~~    | ~~~~                                                                            | Stephanie Nemirov    | Additional CRA    |
| Canada  | London, ON: London Regional Cancer Program                                      | George B Rodrigues   | Site PI           |
| ~~~~    | ~~~~                                                                            | Belal Ahmad          | Clinical/Surgical |
| ~~~~    | ~~~~                                                                            | David DSouza         | Clinical/Surgical |
| ~~~~    | ~~~~                                                                            | Glenn Bauman         | Clinical/Surgical |
| ~~~~    | ~~~~                                                                            | Michael I Lock       | Clinical/Surgical |
| ~~~~    | ~~~~                                                                            | Tracy Sexton         | Clinical/Surgical |
| ~~~~    | ~~~~                                                                            | Varagur M Venkatesan | Clinical/Surgical |
| ~~~~    | ~~~~                                                                            | Kes Sebborn          | Principal CRA     |
| ~~~~    | ~~~~                                                                            | Christina Gurzanski  | Ethics CRA        |
| ~~~~    | ~~~~                                                                            | Laura Bailey         | Ethics CRA        |
| ~~~~    | ~~~~                                                                            | Mary Beth Husson     | Ethics CRA        |
| ~~~~    | ~~~~                                                                            | Patricia Moore       | Ethics CRA        |
| ~~~~    | ~~~~                                                                            | Shannon Kenny        | Ethics CRA        |
| ~~~~    | ~~~~                                                                            | Albert Gratton       | Additional CRA    |
| ~~~~    | ~~~~                                                                            | Craig Johnson        | Additional CRA    |
| ~~~~    | ~~~~                                                                            | Danylle Corkery      | Additional CRA    |
| ~~~~    | ~~~~                                                                            | Darlene tenHaaf      | Additional CRA    |
| ~~~~    | ~~~~                                                                            | Elenor DiLullo       | Additional CRA    |
| ~~~~    | ~~~~                                                                            | Heather Mayer        | Additional CRA    |
| ~~~~    | ~~~~                                                                            | Jennifer A Hare      | Additional CRA    |
| ~~~~    | ~~~~                                                                            | Kate Loughlin        | Additional CRA    |
| ~~~~    | ~~~~                                                                            | Lois Eichenberger    | Additional CRA    |
| ~~~~    | ~~~~                                                                            | Mary Beth Husson     | Additional CRA    |
| ~~~~    | ~~~~                                                                            | Patricia Moore       | Additional CRA    |
| ~~~~    | ~~~~                                                                            | Peggy Francis        | Additional CRA    |
| ~~~~    | ~~~~                                                                            | Stephen Mardell      | Additional CRA    |
| ~~~~    | ~~~~                                                                            | Susan Grant          | Additional CRA    |
| ~~~~    | ~~~~                                                                            | Lori Sax             | Pharmacist        |
| ~~~~    | ~~~~                                                                            | Mary Jane Camara     | Other             |
| Canada  | Montreal, QC: CIUSSS de l'Est-de-l'Île de Montréal Hôpital Maisonneuve-Rosemont | Peter Vavassis       | Site PI           |
| ~~~~    | ~~~~                                                                            | Alma Sylvestre       | Clinical/Surgical |
| ~~~~    | ~~~~                                                                            | Benoit Laliberte     | Clinical/Surgical |
| ~~~~    | ~~~~                                                                            | Celine Lemaire       | Clinical/Surgical |

## INVESTIGATORS AND COLLABORATORS: SITE STAFF

Staff on site delegation logs

| Country | Site                                | Names               | Role              |
|---------|-------------------------------------|---------------------|-------------------|
| ~~~     | ~~~                                 | David H A Nguyen    | Clinical/Surgical |
| ~~~     | ~~~                                 | Michael Yassa       | Clinical/Surgical |
| ~~~     | ~~~                                 | Nader Khaouam       | Clinical/Surgical |
| ~~~     | ~~~                                 | Josee AbiSaad       | Principal CRA     |
| ~~~     | ~~~                                 | Linda RoyHuneault   | Principal CRA     |
| ~~~     | ~~~                                 | Veronique Tran      | Principal CRA     |
| ~~~     | ~~~                                 | Josee AbiSaad       | Ethics CRA        |
| ~~~     | ~~~                                 | Linda RoyHuneault   | Ethics CRA        |
| ~~~     | ~~~                                 | Veronique Tran      | Ethics CRA        |
| ~~~     | ~~~                                 | AnneMarie Chatelain | Additional CRA    |
| ~~~     | ~~~                                 | Jacqueline Fortin   | Additional CRA    |
| ~~~     | ~~~                                 | Linda RoyHuneault   | Additional CRA    |
| ~~~     | ~~~                                 | Nicole Lachance     | Additional CRA    |
| ~~~     | ~~~                                 | Stefanie Houle      | Additional CRA    |
| Canada  | Montreal, QC: McGill University     | Marie Duclos        | Site PI           |
| ~~~     | ~~~                                 | George Shenouda     | Clinical/Surgical |
| ~~~     | ~~~                                 | Luis Souhami        | Clinical/Surgical |
| ~~~     | ~~~                                 | Sergio Luiz Faria   | Clinical/Surgical |
| ~~~     | ~~~                                 | MarieClaude Joncas  | Principal CRA     |
| ~~~     | ~~~                                 | Penny Chipman       | Principal CRA     |
| ~~~     | ~~~                                 | Rajesh Sharma       | Principal CRA     |
| ~~~     | ~~~                                 | Brenda Lee          | Ethics CRA        |
| ~~~     | ~~~                                 | Carolynna Olha      | Ethics CRA        |
| ~~~     | ~~~                                 | Charlotte Corwin    | Ethics CRA        |
| ~~~     | ~~~                                 | Linda Casey         | Ethics CRA        |
| ~~~     | ~~~                                 | Stephanie Larocque  | Ethics CRA        |
| ~~~     | ~~~                                 | Wayne Briand        | Ethics CRA        |
| ~~~     | ~~~                                 | Jamila Adnaan       | Additional CRA    |
| ~~~     | ~~~                                 | Mokhtar Ghou        | Additional CRA    |
| ~~~     | ~~~                                 | Zoe Koulouris       | Pharmacist        |
| ~~~     | ~~~                                 | MarieFrance Robert  | Other             |
| Canada  | Oshawa, ON: Lakeridge Health Oshawa | Wayne Koll          | Site PI           |
| ~~~     | ~~~                                 | Audrey Li           | Clinical/Surgical |
| ~~~     | ~~~                                 | Fawaad Iqbal        | Clinical/Surgical |

## INVESTIGATORS AND COLLABORATORS: SITE STAFF

Staff on site delegation logs

| Country | Site                                       | Names                 | Role              |
|---------|--------------------------------------------|-----------------------|-------------------|
| ~~~     | ~~~                                        | Jimmy Mui             | Clinical/Surgical |
| ~~~     | ~~~                                        | Sten Myrehaug         | Clinical/Surgical |
| ~~~     | ~~~                                        | Ann Mueller           | Principal CRA     |
| ~~~     | ~~~                                        | Helen Norton          | Principal CRA     |
| ~~~     | ~~~                                        | Linda Klich           | Principal CRA     |
| ~~~     | ~~~                                        | Virginia Albrecht     | Principal CRA     |
| ~~~     | ~~~                                        | Edeliza Mendoza       | Ethics CRA        |
| ~~~     | ~~~                                        | Nicole Stevens        | Ethics CRA        |
| ~~~     | ~~~                                        | Aileen Manganaro      | Additional CRA    |
| ~~~     | ~~~                                        | Angelina Singson      | Additional CRA    |
| ~~~     | ~~~                                        | Ann Mueller           | Additional CRA    |
| ~~~     | ~~~                                        | Ashane Somasiri       | Additional CRA    |
| ~~~     | ~~~                                        | Dianne McKee          | Additional CRA    |
| ~~~     | ~~~                                        | Helen Norton          | Additional CRA    |
| ~~~     | ~~~                                        | Jane Froese           | Additional CRA    |
| ~~~     | ~~~                                        | Linda Klich           | Additional CRA    |
| ~~~     | ~~~                                        | Shannon Kift          | Additional CRA    |
| ~~~     | ~~~                                        | Janet Slessor         | Pharmacist        |
| ~~~     | ~~~                                        | Barbara MacGregor     | Other             |
| ~~~     | ~~~                                        | Nancy Froude          | Other             |
| ~~~     | ~~~                                        | Pamela Howitt         | Other             |
| Canada  | Ottawa, ON: Ottawa Hosp Research Institute | Shawn Malone          | Site PI           |
| ~~~     | ~~~                                        | Alain Haddad          | Clinical/Surgical |
| ~~~     | ~~~                                        | Choan E               | Clinical/Surgical |
| ~~~     | ~~~                                        | Gad A Perry           | Clinical/Surgical |
| ~~~     | ~~~                                        | JeanMarc Bourque      | Clinical/Surgical |
| ~~~     | ~~~                                        | Libni Eapen           | Clinical/Surgical |
| ~~~     | ~~~                                        | Robert M MacRae       | Clinical/Surgical |
| ~~~     | ~~~                                        | Scott Morgan          | Clinical/Surgical |
| ~~~     | ~~~                                        | Wayne S Kendal        | Clinical/Surgical |
| ~~~     | ~~~                                        | Caroline Proulx       | Principal CRA     |
| ~~~     | ~~~                                        | Margaret MacGillivray | Principal CRA     |
| ~~~     | ~~~                                        | Scott Grimes          | Principal CRA     |
| ~~~     | ~~~                                        | Stella Park           | Principal CRA     |

## INVESTIGATORS AND COLLABORATORS: SITE STAFF

Staff on site delegation logs

| Country | Site                                  | Names                 | Role              |
|---------|---------------------------------------|-----------------------|-------------------|
| ~~~     | ~~~                                   | Archana Tikoo         | Ethics CRA        |
| ~~~     | ~~~                                   | Elina Iordanidi       | Ethics CRA        |
| ~~~     | ~~~                                   | Femina Kanji          | Ethics CRA        |
| ~~~     | ~~~                                   | Julie Nguyen          | Ethics CRA        |
| ~~~     | ~~~                                   | Koralee Berghout      | Ethics CRA        |
| ~~~     | ~~~                                   | Lisa Turriff          | Ethics CRA        |
| ~~~     | ~~~                                   | Maria Sanchez         | Ethics CRA        |
| ~~~     | ~~~                                   | MarieClaude Reeves    | Ethics CRA        |
| ~~~     | ~~~                                   | Mary Spearman         | Ethics CRA        |
| ~~~     | ~~~                                   | Matt Fish             | Ethics CRA        |
| ~~~     | ~~~                                   | Nancy Eze             | Ethics CRA        |
| ~~~     | ~~~                                   | Amy Carkner           | Additional CRA    |
| ~~~     | ~~~                                   | Anna OBrien           | Additional CRA    |
| ~~~     | ~~~                                   | Caroline Proulx       | Additional CRA    |
| ~~~     | ~~~                                   | Joanne Roach          | Additional CRA    |
| ~~~     | ~~~                                   | Kimberly Hicks        | Additional CRA    |
| ~~~     | ~~~                                   | Lisa MacMullin        | Additional CRA    |
| ~~~     | ~~~                                   | Margaret MacGillivray | Additional CRA    |
| ~~~     | ~~~                                   | Nancy Page            | Additional CRA    |
| ~~~     | ~~~                                   | Natalie Wright        | Additional CRA    |
| ~~~     | ~~~                                   | Patti Spencer         | Additional CRA    |
| ~~~     | ~~~                                   | Scott Grimes          | Additional CRA    |
| ~~~     | ~~~                                   | Stella Park           | Additional CRA    |
| Canada  | Quebec City, QC: Hotel-Dieu de Quebec | Eric Vigneault        | Site PI           |
| ~~~     | ~~~                                   | AndreGuy Martin       | Clinical/Surgical |
| ~~~     | ~~~                                   | JoseLuis Gomez        | Clinical/Surgical |
| ~~~     | ~~~                                   | Lara Hathout          | Clinical/Surgical |
| ~~~     | ~~~                                   | Leonello Cusan        | Clinical/Surgical |
| ~~~     | ~~~                                   | Luis Diaz de Bedoya   | Clinical/Surgical |
| ~~~     | ~~~                                   | William Foster        | Clinical/Surgical |
| ~~~     | ~~~                                   | Josee Allard          | Principal CRA     |
| ~~~     | ~~~                                   | Isabelle Desrosiers   | Ethics CRA        |
| ~~~     | ~~~                                   | Josee Allard          | Ethics CRA        |
| ~~~     | ~~~                                   | Danielle Cossette     | Additional CRA    |

## INVESTIGATORS AND COLLABORATORS: SITE STAFF

Staff on site delegation logs

| Country | Site                                                                                | Names                    | Role              |
|---------|-------------------------------------------------------------------------------------|--------------------------|-------------------|
| ~~~     | ~~~                                                                                 | Josee Allard             | Additional CRA    |
| ~~~     | ~~~                                                                                 | MarieAndree Lajoie       | Additional CRA    |
| ~~~     | ~~~                                                                                 | Nathalie Dufour          | Additional CRA    |
| ~~~     | ~~~                                                                                 | Sophie Pouliot           | Additional CRA    |
| Canada  | Sherbrooke, QC: CIUSSS de l'Estrie - Centre hospitalier universitaire de Sherbrooke | Abdenour Nabid           | Site PI           |
| ~~~     | ~~~                                                                                 | Annie Ebacher            | Clinical/Surgical |
| ~~~     | ~~~                                                                                 | Audrey TetreaultLaflamme | Clinical/Surgical |
| ~~~     | ~~~                                                                                 | Isabelle C Gauthier      | Clinical/Surgical |
| ~~~     | ~~~                                                                                 | Michel Carmel            | Clinical/Surgical |
| ~~~     | ~~~                                                                                 | Myriam Bouchard          | Clinical/Surgical |
| ~~~     | ~~~                                                                                 | Rachel Bujold            | Clinical/Surgical |
| ~~~     | ~~~                                                                                 | Robert Sabbagh           | Clinical/Surgical |
| ~~~     | ~~~                                                                                 | Sophie Couture           | Principal CRA     |
| ~~~     | ~~~                                                                                 | Sophie Couture           | Ethics CRA        |
| ~~~     | ~~~                                                                                 | Alexandra Lamoureux      | Additional CRA    |
| ~~~     | ~~~                                                                                 | Cynthia Ladouceur        | Additional CRA    |
| ~~~     | ~~~                                                                                 | Diane Pearson            | Additional CRA    |
| ~~~     | ~~~                                                                                 | Genevieve Cote           | Additional CRA    |
| ~~~     | ~~~                                                                                 | Helene Dion              | Additional CRA    |
| ~~~     | ~~~                                                                                 | Julie Larouche           | Additional CRA    |
| ~~~     | ~~~                                                                                 | Tania Marquis            | Additional CRA    |
| Canada  | Toronto, ON: Dr. H. Bliss Murphy Cancer Centre                                      | Jinka R Sathya           | Site PI           |
| ~~~     | ~~~                                                                                 | John Thoms               | Site PI           |
| ~~~     | ~~~                                                                                 | Alia Norman              | Clinical/Surgical |
| ~~~     | ~~~                                                                                 | Asim Kamran              | Clinical/Surgical |
| ~~~     | ~~~                                                                                 | Craig Pochini            | Clinical/Surgical |
| ~~~     | ~~~                                                                                 | Jonathan Greenland       | Clinical/Surgical |
| ~~~     | ~~~                                                                                 | Allison Joy              | Principal CRA     |
| ~~~     | ~~~                                                                                 | Elysia Desai             | Principal CRA     |
| ~~~     | ~~~                                                                                 | Kelli Mitchell           | Principal CRA     |
| ~~~     | ~~~                                                                                 | Arifur Rahman            | Ethics CRA        |
| ~~~     | ~~~                                                                                 | Dawne Putt               | Ethics CRA        |
| ~~~     | ~~~                                                                                 | Erin Baker               | Ethics CRA        |
| ~~~     | ~~~                                                                                 | Lauren Rickert           | Ethics CRA        |

## INVESTIGATORS AND COLLABORATORS: SITE STAFF

Staff on site delegation logs

| Country | Site                              | Names                 | Role              |
|---------|-----------------------------------|-----------------------|-------------------|
| ~~~     | ~~~                               | Liz Fuller            | Ethics CRA        |
| ~~~     | ~~~                               | Matthew Nelder        | Ethics CRA        |
| ~~~     | ~~~                               | Stacy Whittle         | Ethics CRA        |
| ~~~     | ~~~                               | Allison Joy           | Additional CRA    |
| ~~~     | ~~~                               | Ashley Hoskins        | Additional CRA    |
| ~~~     | ~~~                               | Breanne Teasdale      | Additional CRA    |
| ~~~     | ~~~                               | Chrystal Whiteway     | Additional CRA    |
| ~~~     | ~~~                               | Denise Galway         | Additional CRA    |
| ~~~     | ~~~                               | Elysia Desai          | Additional CRA    |
| ~~~     | ~~~                               | Erin Pinnell          | Additional CRA    |
| ~~~     | ~~~                               | Gail House            | Additional CRA    |
| ~~~     | ~~~                               | Geoffrey Blackwood    | Additional CRA    |
| ~~~     | ~~~                               | Jamie ODea            | Additional CRA    |
| ~~~     | ~~~                               | Kelli Mitchell        | Additional CRA    |
| ~~~     | ~~~                               | Kimberley Manning     | Additional CRA    |
| ~~~     | ~~~                               | Liz Fuller            | Additional CRA    |
| ~~~     | ~~~                               | Lorilee Noel          | Additional CRA    |
| ~~~     | ~~~                               | Zeta Hannaford        | Pharmacist        |
| Canada  | Toronto, ON: Odette Cancer Centre | Hans T Chung          | Site PI           |
| ~~~     | ~~~                               | Cyril Danjoux         | Clinical/Surgical |
| ~~~     | ~~~                               | Danny Vesprini        | Clinical/Surgical |
| ~~~     | ~~~                               | Douglas Andrew Loblaw | Clinical/Surgical |
| ~~~     | ~~~                               | Eric Chia Lin Tseng   | Clinical/Surgical |
| ~~~     | ~~~                               | Ewa Szumacher         | Clinical/Surgical |
| ~~~     | ~~~                               | Gerard Morton         | Clinical/Surgical |
| ~~~     | ~~~                               | Laurence Klotz        | Clinical/Surgical |
| ~~~     | ~~~                               | Patrick CF Cheung     | Clinical/Surgical |
| ~~~     | ~~~                               | Robert K Nam          | Clinical/Surgical |
| ~~~     | ~~~                               | Stanley Liu           | Clinical/Surgical |
| ~~~     | ~~~                               | William Chu           | Clinical/Surgical |
| ~~~     | ~~~                               | Anam Shahid           | Principal CRA     |
| ~~~     | ~~~                               | Andrea DeAbreu        | Principal CRA     |
| ~~~     | ~~~                               | Arlynnne Marquez      | Principal CRA     |
| ~~~     | ~~~                               | Kristina Commisso     | Principal CRA     |

## INVESTIGATORS AND COLLABORATORS: SITE STAFF

Staff on site delegation logs

| Country | Site                                                                   | Names              | Role              |
|---------|------------------------------------------------------------------------|--------------------|-------------------|
| ~~~     | ~~~                                                                    | Senny Chan         | Principal CRA     |
| ~~~     | ~~~                                                                    | Vivette Escueta    | Principal CRA     |
| ~~~     | ~~~                                                                    | Andrea DeAbreu     | Ethics CRA        |
| ~~~     | ~~~                                                                    | Arlynnne Marquez   | Ethics CRA        |
| ~~~     | ~~~                                                                    | Kristina Commisso  | Ethics CRA        |
| ~~~     | ~~~                                                                    | Senny Chan         | Ethics CRA        |
| ~~~     | ~~~                                                                    | Zeeba Bhounr       | Ethics CRA        |
| ~~~     | ~~~                                                                    | Anam Shahid        | Additional CRA    |
| ~~~     | ~~~                                                                    | Andrea DeAbreu     | Additional CRA    |
| ~~~     | ~~~                                                                    | Angela Commisso    | Additional CRA    |
| ~~~     | ~~~                                                                    | Arlynnne Marquez   | Additional CRA    |
| ~~~     | ~~~                                                                    | Leila Malek        | Additional CRA    |
| ~~~     | ~~~                                                                    | Zeeba Bhounr       | Additional CRA    |
| ~~~     | ~~~                                                                    | Michael Leung      | Pharmacist        |
| Canada  | Toronto, ON: University Health Network Princess Margaret Cancer Centre | Charles Catton     | Site PI           |
| ~~~     | ~~~                                                                    | Alejandro Berlin   | Clinical/Surgical |
| ~~~     | ~~~                                                                    | Andrew J Bayley    | Clinical/Surgical |
| ~~~     | ~~~                                                                    | Cynthia Menard     | Clinical/Surgical |
| ~~~     | ~~~                                                                    | Joelle Helou       | Clinical/Surgical |
| ~~~     | ~~~                                                                    | Mary Gospodarowicz | Clinical/Surgical |
| ~~~     | ~~~                                                                    | Michael Milosevic  | Clinical/Surgical |
| ~~~     | ~~~                                                                    | Nafisha Lalani     | Clinical/Surgical |
| ~~~     | ~~~                                                                    | Padraig Warde      | Clinical/Surgical |
| ~~~     | ~~~                                                                    | Peter Chung        | Clinical/Surgical |
| ~~~     | ~~~                                                                    | Robert Bristow     | Clinical/Surgical |
| ~~~     | ~~~                                                                    | Srinivas Raman     | Clinical/Surgical |
| ~~~     | ~~~                                                                    | Andrei Rotarescu   | Principal CRA     |
| ~~~     | ~~~                                                                    | Evan Strom         | Principal CRA     |
| ~~~     | ~~~                                                                    | Ida Lee            | Principal CRA     |
| ~~~     | ~~~                                                                    | Mary Tannourji     | Principal CRA     |
| ~~~     | ~~~                                                                    | Melissa Lem        | Principal CRA     |
| ~~~     | ~~~                                                                    | Navneet Arora      | Principal CRA     |
| ~~~     | ~~~                                                                    | Suzana Djuric      | Principal CRA     |
| ~~~     | ~~~                                                                    | Andrei Rotarescu   | Ethics CRA        |

## INVESTIGATORS AND COLLABORATORS: SITE STAFF

Staff on site delegation logs

| Country | Site | Names                  | Role           |
|---------|------|------------------------|----------------|
| ~~~     | ~~~  | Evan Strom             | Ethics CRA     |
| ~~~     | ~~~  | Ida Lee                | Ethics CRA     |
| ~~~     | ~~~  | Mary Tannourji         | Ethics CRA     |
| ~~~     | ~~~  | Melissa Lem            | Ethics CRA     |
| ~~~     | ~~~  | Navneet Arora          | Ethics CRA     |
| ~~~     | ~~~  | Suzana Djuric          | Ethics CRA     |
| ~~~     | ~~~  | Aleksandra Petrovska   | Additional CRA |
| ~~~     | ~~~  | Aleksandra Topalovich  | Additional CRA |
| ~~~     | ~~~  | Amadeus Chui           | Additional CRA |
| ~~~     | ~~~  | Andrei Rotarescu       | Additional CRA |
| ~~~     | ~~~  | Arundhati Shukla       | Additional CRA |
| ~~~     | ~~~  | Avi Petroff            | Additional CRA |
| ~~~     | ~~~  | Bernadeth Lao          | Additional CRA |
| ~~~     | ~~~  | Cynthia Torres         | Additional CRA |
| ~~~     | ~~~  | Daeria Lawson          | Additional CRA |
| ~~~     | ~~~  | Daniel Ang             | Additional CRA |
| ~~~     | ~~~  | Debbie Tsuji           | Additional CRA |
| ~~~     | ~~~  | Emily Gregorcic        | Additional CRA |
| ~~~     | ~~~  | Erin Velec             | Additional CRA |
| ~~~     | ~~~  | Evan Strom             | Additional CRA |
| ~~~     | ~~~  | Heidi Chan             | Additional CRA |
| ~~~     | ~~~  | Ida Lee                | Additional CRA |
| ~~~     | ~~~  | Jessy Abed             | Additional CRA |
| ~~~     | ~~~  | John Hsien             | Additional CRA |
| ~~~     | ~~~  | Judy Quintos           | Additional CRA |
| ~~~     | ~~~  | Karen Tse              | Additional CRA |
| ~~~     | ~~~  | Kathryn Sabate         | Additional CRA |
| ~~~     | ~~~  | Kris Wallace           | Additional CRA |
| ~~~     | ~~~  | Kyoko Tiessen          | Additional CRA |
| ~~~     | ~~~  | Maria Jose Gaitan Ruiz | Additional CRA |
| ~~~     | ~~~  | Mary Tannourji         | Additional CRA |
| ~~~     | ~~~  | Nanthini Tharahan      | Additional CRA |
| ~~~     | ~~~  | Nicole Gumapac         | Additional CRA |
| ~~~     | ~~~  | Pat Merante            | Additional CRA |



## INVESTIGATORS AND COLLABORATORS: SITE STAFF

Staff on site delegation logs

| Country | Site                                                              | Names                | Role              |
|---------|-------------------------------------------------------------------|----------------------|-------------------|
| ~~~     | ~~~                                                               | Ramesh Mirmooji      | Additional CRA    |
| ~~~     | ~~~                                                               | Sandra Pineda        | Additional CRA    |
| ~~~     | ~~~                                                               | Sarah Degendorfer    | Additional CRA    |
| ~~~     | ~~~                                                               | Sarah Ramotar        | Additional CRA    |
| ~~~     | ~~~                                                               | Sarin Peres          | Additional CRA    |
| ~~~     | ~~~                                                               | Suzana Djuric        | Additional CRA    |
| ~~~     | ~~~                                                               | Vaishaali Thevarajah | Additional CRA    |
| ~~~     | ~~~                                                               | Vickie Kong          | Additional CRA    |
| ~~~     | ~~~                                                               | Zaynab Muraj         | Additional CRA    |
| Canada  | Trois-Rivieres, QC: Centre hospitalier regional de Trois-Rivieres | Francois Vincent     | Site PI           |
| ~~~     | ~~~                                                               | Benoit Lebrun        | Clinical/Surgical |
| ~~~     | ~~~                                                               | Julie Harvey         | Clinical/Surgical |
| ~~~     | ~~~                                                               | LindaSuzanne Vincent | Clinical/Surgical |
| ~~~     | ~~~                                                               | MarieEve Sicard      | Clinical/Surgical |
| ~~~     | ~~~                                                               | Rafika Dahmane       | Clinical/Surgical |
| ~~~     | ~~~                                                               | MarieEve Caron       | Principal CRA     |
| ~~~     | ~~~                                                               | MarieEve Caron       | Ethics CRA        |
| ~~~     | ~~~                                                               | Andreanne Thibeault  | Additional CRA    |
| ~~~     | ~~~                                                               | Julie Samson         | Additional CRA    |
| ~~~     | ~~~                                                               | Line Marineau        | Additional CRA    |
| ~~~     | ~~~                                                               | MarieEve Bisson      | Additional CRA    |
| ~~~     | ~~~                                                               | Vanessa Gagne        | Additional CRA    |
| ~~~     | ~~~                                                               | Julie Montour        | Pharmacist        |
| Canada  | Vancouver, BC: Vancouver Cancer Centre                            | Abraham S Alexander  | Site PI           |
| ~~~     | ~~~                                                               | Jennifer Goulart     | Site PI           |
| ~~~     | ~~~                                                               | Abraham S Alexander  | Clinical/Surgical |
| ~~~     | ~~~                                                               | Caroline Holloway    | Clinical/Surgical |
| ~~~     | ~~~                                                               | Daniel Glick         | Clinical/Surgical |
| ~~~     | ~~~                                                               | Emilie Priestley     | Clinical/Surgical |
| ~~~     | ~~~                                                               | Howard H Pai         | Clinical/Surgical |
| ~~~     | ~~~                                                               | Howard Joe           | Clinical/Surgical |
| ~~~     | ~~~                                                               | Isabelle Vallieres   | Clinical/Surgical |
| ~~~     | ~~~                                                               | Jacqueline Lam       | Clinical/Surgical |
| ~~~     | ~~~                                                               | Jan Lim              | Clinical/Surgical |

## INVESTIGATORS AND COLLABORATORS: SITE STAFF

Staff on site delegation logs

| Country | Site                                         | Names                  | Role              |
|---------|----------------------------------------------|------------------------|-------------------|
| ~~~     | ~~~                                          | Jennifer Goulart       | Clinical/Surgical |
| ~~~     | ~~~                                          | Joycelin Canavan       | Clinical/Surgical |
| ~~~     | ~~~                                          | Negin Shahid           | Clinical/Surgical |
| ~~~     | ~~~                                          | Nelson Leong           | Clinical/Surgical |
| ~~~     | ~~~                                          | Paul A Blood           | Clinical/Surgical |
| ~~~     | ~~~                                          | Emily White            | Principal CRA     |
| ~~~     | ~~~                                          | Heather Lockyer        | Principal CRA     |
| ~~~     | ~~~                                          | Michael A Miller       | Principal CRA     |
| ~~~     | ~~~                                          | Sally Hodgson          | Principal CRA     |
| ~~~     | ~~~                                          | Sarah Irons            | Principal CRA     |
| ~~~     | ~~~                                          | Senz Hamilton          | Principal CRA     |
| ~~~     | ~~~                                          | Emily White            | Ethics CRA        |
| ~~~     | ~~~                                          | Heather Lockyer        | Ethics CRA        |
| ~~~     | ~~~                                          | Michael A Miller       | Ethics CRA        |
| ~~~     | ~~~                                          | Sally Hodgson          | Ethics CRA        |
| ~~~     | ~~~                                          | Sarah Irons            | Ethics CRA        |
| ~~~     | ~~~                                          | Senz Hamilton          | Ethics CRA        |
| ~~~     | ~~~                                          | Alia Lomas             | Additional CRA    |
| ~~~     | ~~~                                          | Cathy Lacey            | Additional CRA    |
| ~~~     | ~~~                                          | Eleanor Holwerda       | Additional CRA    |
| ~~~     | ~~~                                          | Heather Lockyer        | Additional CRA    |
| ~~~     | ~~~                                          | Mia AnnaMaria Clements | Additional CRA    |
| ~~~     | ~~~                                          | Michael A Miller       | Additional CRA    |
| ~~~     | ~~~                                          | Senz Hamilton          | Additional CRA    |
| Canada  | Victoria, BC: Vancouver Island Cancer Centre | Charmaine KimSing      | Site PI           |
| ~~~     | ~~~                                          | Alan I So              | Clinical/Surgical |
| ~~~     | ~~~                                          | Graeme Duncan          | Clinical/Surgical |
| ~~~     | ~~~                                          | Martin E Gleave        | Clinical/Surgical |
| ~~~     | ~~~                                          | Michael McKenzie       | Clinical/Surgical |
| ~~~     | ~~~                                          | Michael Peacock        | Clinical/Surgical |
| ~~~     | ~~~                                          | Mira Keyes             | Clinical/Surgical |
| ~~~     | ~~~                                          | S Larry Goldenberg     | Clinical/Surgical |
| ~~~     | ~~~                                          | Scott Tyldesley        | Clinical/Surgical |
| ~~~     | ~~~                                          | Sree Rodda             | Clinical/Surgical |

## INVESTIGATORS AND COLLABORATORS: SITE STAFF

Staff on site delegation logs

| Country | Site                              | Names                 | Role              |
|---------|-----------------------------------|-----------------------|-------------------|
| ~~~     | ~~~                               | Thomas A Pickles      | Clinical/Surgical |
| ~~~     | ~~~                               | Tina Wanting Zhang    | Clinical/Surgical |
| ~~~     | ~~~                               | William James Morris  | Clinical/Surgical |
| ~~~     | ~~~                               | Dana Matuszewski      | Principal CRA     |
| ~~~     | ~~~                               | Devon Poznanski       | Principal CRA     |
| ~~~     | ~~~                               | Lejla Gavranovic      | Principal CRA     |
| ~~~     | ~~~                               | Lorenz Yeung          | Principal CRA     |
| ~~~     | ~~~                               | Sandy Chang           | Principal CRA     |
| ~~~     | ~~~                               | Dana Matuszewski      | Ethics CRA        |
| ~~~     | ~~~                               | Devon Poznanski       | Ethics CRA        |
| ~~~     | ~~~                               | Lejla Gavranovic      | Ethics CRA        |
| ~~~     | ~~~                               | Lorenz Yeung          | Ethics CRA        |
| ~~~     | ~~~                               | Sandy Chang           | Ethics CRA        |
| ~~~     | ~~~                               | Sheena Sibug          | Additional CRA    |
| ~~~     | ~~~                               | Subashini Karunakaran | Additional CRA    |
| ~~~     | ~~~                               | Lynne Nakashima       | Pharmacist        |
| Canada  | Winnipeg, MB: CancerCare Manitoba | Aldrich Dixon Ong     | Site PI           |
| ~~~     | ~~~                               | Amitava D Chowdhury   | Clinical/Surgical |
| ~~~     | ~~~                               | Arbind Dubey          | Clinical/Surgical |
| ~~~     | ~~~                               | Atul Sharma           | Clinical/Surgical |
| ~~~     | ~~~                               | Bashir Bashir         | Clinical/Surgical |
| ~~~     | ~~~                               | Darrel E Drachenberg  | Clinical/Surgical |
| ~~~     | ~~~                               | David Dawe            | Clinical/Surgical |
| ~~~     | ~~~                               | Gokulan Sivananthan   | Clinical/Surgical |
| ~~~     | ~~~                               | Hanbo Zhang           | Clinical/Surgical |
| ~~~     | ~~~                               | Harvey Quon           | Clinical/Surgical |
| ~~~     | ~~~                               | Jeffrey Graham        | Clinical/Surgical |
| ~~~     | ~~~                               | Maged Nashed          | Clinical/Surgical |
| ~~~     | ~~~                               | Rashmi Koul           | Clinical/Surgical |
| ~~~     | ~~~                               | Shahida Ahmed         | Clinical/Surgical |
| ~~~     | ~~~                               | William Hunter        | Clinical/Surgical |
| ~~~     | ~~~                               | Amber DelisleCorps    | Principal CRA     |
| ~~~     | ~~~                               | Chinedu Ifeanyi       | Principal CRA     |
| ~~~     | ~~~                               | Christopher Schroeder | Principal CRA     |

## INVESTIGATORS AND COLLABORATORS: SITE STAFF

Staff on site delegation logs

| Country | Site | Names                 | Role           |
|---------|------|-----------------------|----------------|
| ~~~     | ~~~  | Elizabeth Lylyk       | Principal CRA  |
| ~~~     | ~~~  | Heidi Kampen          | Principal CRA  |
| ~~~     | ~~~  | Maggie Putnam         | Principal CRA  |
| ~~~     | ~~~  | Megan Ridler          | Principal CRA  |
| ~~~     | ~~~  | Melissa Bridges       | Principal CRA  |
| ~~~     | ~~~  | Sandy Yap             | Principal CRA  |
| ~~~     | ~~~  | Swati Singla          | Principal CRA  |
| ~~~     | ~~~  | Tianna Mohammed       | Principal CRA  |
| ~~~     | ~~~  | Amber DelisleCorps    | Ethics CRA     |
| ~~~     | ~~~  | Chinedu Ifeanyi       | Ethics CRA     |
| ~~~     | ~~~  | Christopher Schroeder | Ethics CRA     |
| ~~~     | ~~~  | Christy Turner        | Ethics CRA     |
| ~~~     | ~~~  | Darlene Zwarych       | Ethics CRA     |
| ~~~     | ~~~  | DeepKumar Patel       | Ethics CRA     |
| ~~~     | ~~~  | Elizabeth Lylyk       | Ethics CRA     |
| ~~~     | ~~~  | Heidi Kampen          | Ethics CRA     |
| ~~~     | ~~~  | Jennifer McNish       | Ethics CRA     |
| ~~~     | ~~~  | Jill Jacinto          | Ethics CRA     |
| ~~~     | ~~~  | JoAnn Weir            | Ethics CRA     |
| ~~~     | ~~~  | Joyce Wei             | Ethics CRA     |
| ~~~     | ~~~  | Laurel Johnston       | Ethics CRA     |
| ~~~     | ~~~  | Leah Bergen           | Ethics CRA     |
| ~~~     | ~~~  | Lovely Cadiz          | Ethics CRA     |
| ~~~     | ~~~  | Maggie Putnam         | Ethics CRA     |
| ~~~     | ~~~  | Megan Ridler          | Ethics CRA     |
| ~~~     | ~~~  | Melissa Bridges       | Ethics CRA     |
| ~~~     | ~~~  | Raquel Gamez          | Ethics CRA     |
| ~~~     | ~~~  | Sandy Yap             | Ethics CRA     |
| ~~~     | ~~~  | Swati Singla          | Ethics CRA     |
| ~~~     | ~~~  | Theresa Moore         | Ethics CRA     |
| ~~~     | ~~~  | Tianna Mohammed       | Ethics CRA     |
| ~~~     | ~~~  | Allison Wood          | Additional CRA |
| ~~~     | ~~~  | Arpita Majumdar       | Additional CRA |
| ~~~     | ~~~  | Ashley Ouelette       | Additional CRA |

## INVESTIGATORS AND COLLABORATORS: SITE STAFF

Staff on site delegation logs

| Country | Site | Names                | Role           |
|---------|------|----------------------|----------------|
| ~~~     | ~~~  | Barb Ammeter         | Additional CRA |
| ~~~     | ~~~  | Caitlin Kitkowski    | Additional CRA |
| ~~~     | ~~~  | Cristina Francisco   | Additional CRA |
| ~~~     | ~~~  | Debbie Last          | Additional CRA |
| ~~~     | ~~~  | Gina Garrett         | Additional CRA |
| ~~~     | ~~~  | Heather Davies       | Additional CRA |
| ~~~     | ~~~  | Heather Long         | Additional CRA |
| ~~~     | ~~~  | Heidi Kampen         | Additional CRA |
| ~~~     | ~~~  | Jacqueline Chahine   | Additional CRA |
| ~~~     | ~~~  | Jamie Vaughn         | Additional CRA |
| ~~~     | ~~~  | Jill Jacinto         | Additional CRA |
| ~~~     | ~~~  | Joelle DuMontier     | Additional CRA |
| ~~~     | ~~~  | Julia Giovannini     | Additional CRA |
| ~~~     | ~~~  | Kathi Klapp          | Additional CRA |
| ~~~     | ~~~  | Kathleen Marek       | Additional CRA |
| ~~~     | ~~~  | Kathy Cherepak       | Additional CRA |
| ~~~     | ~~~  | Kathy Trakalo        | Additional CRA |
| ~~~     | ~~~  | KuanLin Li           | Additional CRA |
| ~~~     | ~~~  | Laurie Mills         | Additional CRA |
| ~~~     | ~~~  | Leanne Anderson      | Additional CRA |
| ~~~     | ~~~  | Lisa Peak            | Additional CRA |
| ~~~     | ~~~  | Lori Walker          | Additional CRA |
| ~~~     | ~~~  | Mandy Squires        | Additional CRA |
| ~~~     | ~~~  | Maria Morales        | Additional CRA |
| ~~~     | ~~~  | Marilyn Pawl         | Additional CRA |
| ~~~     | ~~~  | Megan Ridler         | Additional CRA |
| ~~~     | ~~~  | Melanie R Watson     | Additional CRA |
| ~~~     | ~~~  | Patricia Benjaminson | Additional CRA |
| ~~~     | ~~~  | Priscilla Santos     | Additional CRA |
| ~~~     | ~~~  | Rayleen Rudnicki     | Additional CRA |
| ~~~     | ~~~  | Rhonda Nichol        | Additional CRA |
| ~~~     | ~~~  | Robyn Guarino        | Additional CRA |
| ~~~     | ~~~  | Rose Woloshyn        | Additional CRA |
| ~~~     | ~~~  | Sandy Yap            | Additional CRA |

## INVESTIGATORS AND COLLABORATORS: SITE STAFF

Staff on site delegation logs

| Country | Site                                       | Names                     | Role                   |
|---------|--------------------------------------------|---------------------------|------------------------|
| ~~~     | ~~~                                        | Shauna Priebe             | Additional CRA         |
| ~~~     | ~~~                                        | Stacey Rizzuto            | Additional CRA         |
| ~~~     | ~~~                                        | Taehee Ann                | Additional CRA         |
| ~~~     | ~~~                                        | Theresa Moore             | Additional CRA         |
| ~~~     | ~~~                                        | Tiffani Eska              | Additional CRA         |
| ~~~     | ~~~                                        | Tracy Chornopyski         | Additional CRA         |
| ~~~     | ~~~                                        | Valerie Kuzyk             | Additional CRA         |
| ~~~     | ~~~                                        | Zeljka Bakija             | Additional CRA         |
| Denmark | Aalborg: Aalborg University Hosp           | Ms Mette Moe Kempel       | Site PI                |
| ~~~     | ~~~                                        | Mr Niels Harving          | Clinical/Surgical      |
| ~~~     | ~~~                                        | Mr Finn Hejlesen          | Point of contact (1st) |
| ~~~     | ~~~                                        | Ms Kirsten Steffensen     | Research Nurse         |
| Denmark | Aarhus: Aarhus Kommunehospital             | Dr Simon Buus             | Site PI                |
| ~~~     | ~~~                                        | Dr Henrik Schultz         | Clinical/Surgical      |
| ~~~     | ~~~                                        | Dr Henrik Schultz         | Clinical/Surgical      |
| ~~~     | ~~~                                        | Dr Kirsten Fode           | Clinical/Surgical      |
| ~~~     | ~~~                                        | Dr Lise Bentzen           | Clinical/Surgical      |
| ~~~     | ~~~                                        | Dr Michael Borre          | Clinical/Surgical      |
| ~~~     | ~~~                                        | Dr Slavka Lucakova        | Clinical/Surgical      |
| ~~~     | ~~~                                        | Dr Yasmin Lassen          | Clinical/Surgical      |
| ~~~     | ~~~                                        | Ms Helle Lemng Kruse      | Point of contact (1st) |
| ~~~     | ~~~                                        | Ms Helle Nørmark Iversen  | Point of contact (1st) |
| ~~~     | ~~~                                        | Ms Vibeke Laursen         | Point of contact (1st) |
| ~~~     | ~~~                                        | Ms Birgit Kaa Bach        | Research Nurse         |
| Denmark | Copenhagen: Rigshospitalet University Hosp | Dr Peter Meidhal Petersen | Site PI                |
| ~~~     | ~~~                                        | Dr Anne Juel Christensen  | Clinical/Surgical      |
| ~~~     | ~~~                                        | Prof Klaus Brasso         | Clinical/Surgical      |
| ~~~     | ~~~                                        | Ms Anne Sofie Lunau       | Point of contact (1st) |
| ~~~     | ~~~                                        | Ms Sine Stilling          | Point of contact (1st) |
| ~~~     | ~~~                                        | Ms Stine Thim             | Point of contact (1st) |
| ~~~     | ~~~                                        | Ms Karina Klovgaard       | Point of contact (2nd) |
| ~~~     | ~~~                                        | Ms Anna Torin Lehmann     | Research Nurse         |
| ~~~     | ~~~                                        | Ms Lisa Gruschy           | Research Nurse         |
| ~~~     | ~~~                                        | Ms Lone Lund Poder        | Research Nurse         |

## INVESTIGATORS AND COLLABORATORS: SITE STAFF

Staff on site delegation logs

| Country | Site                                                    | Names                       | Role                   |
|---------|---------------------------------------------------------|-----------------------------|------------------------|
| ~~~     | ~~~                                                     | Ms Maria Vandborg           | Research Nurse         |
| ~~~     | ~~~                                                     | Ms Trine Moller Christensen | Research Nurse         |
| ~~~     | ~~~                                                     | Ms Kristine Ribers          | Other                  |
| Denmark | Herlev: Amtssygehuset i Herlev (Herlev University Hosp) | Dr Henriette Lindberg       | Site PI                |
| ~~~     | ~~~                                                     | Ms Kathrine Friser Kokholm  | Point of contact (1st) |
| ~~~     | ~~~                                                     | Ms Tine Christensen         | Point of contact (1st) |
| ~~~     | ~~~                                                     | Ms Charlotte Saxe           | Trial Coordinator      |
| ~~~     | ~~~                                                     | Ms Eva Rønnengart           | Trial Coordinator      |
| ~~~     | ~~~                                                     | Kirstine Nybom              | Other                  |
| Ireland | Galway: University College Hosp Galway                  | Mr Garret Durkan            | Site PI                |
| ~~~     | ~~~                                                     | Dr Joseph Martin            | Clinical/Surgical      |
| ~~~     | ~~~                                                     | Mr Eamonn Rogers            | Clinical/Surgical      |
| ~~~     | ~~~                                                     | Prof Frank Sullivan         | Clinical/Surgical      |
| ~~~     | ~~~                                                     | Ms Chiaw Woon Teh           | Point of contact (1st) |
| ~~~     | ~~~                                                     | Ms Marian Jennings          | Point of contact (1st) |
| ~~~     | ~~~                                                     | Ms Ann Wright               | Point of contact (2nd) |
| ~~~     | ~~~                                                     | Ms Catriona Mahoney         | Research Nurse         |
| ~~~     | ~~~                                                     | Ms Liz Raftery              | Research Nurse         |
| ~~~     | ~~~                                                     | Ms Mary Marg Byrne          | Research Nurse         |
| ~~~     | ~~~                                                     | Ms Veronica McInerney       | Research Nurse         |
| ~~~     | ~~~                                                     | Ms Emma Deenihan            | Administrator          |
| ~~~     | ~~~                                                     | Ms Maria Spillane           | Other                  |
| UK      | Aberdeen: Aberdeen Royal Inf                            | Dr Graham MacDonald         | Site PI                |
| ~~~     | ~~~                                                     | Dr Donald Bissett           | Clinical/Surgical      |
| ~~~     | ~~~                                                     | Dr Judith Grant             | Clinical/Surgical      |
| ~~~     | ~~~                                                     | Mr Rory Lynch               | Point of contact (1st) |
| ~~~     | ~~~                                                     | Mrs Rachel Moir             | Point of contact (1st) |
| ~~~     | ~~~                                                     | Ms Marie McWilliam          | Point of contact (1st) |
| ~~~     | ~~~                                                     | Ms Kirsty Shearer           | Point of contact (2nd) |
| ~~~     | ~~~                                                     | Mrs Margaret Smith          | Research Nurse         |
| ~~~     | ~~~                                                     | Ms Sue Rodwell              | Research Nurse         |
| ~~~     | ~~~                                                     | Ms Shelagh Bonner-Shand     | Trial Coordinator      |
| UK      | Airedale: Airedale General Hosp                         | Dr Ganesan Jeyasanger       | Site PI                |
| ~~~     | ~~~                                                     | Dr Ann Henry                | Clinical/Surgical      |

## INVESTIGATORS AND COLLABORATORS: SITE STAFF

Staff on site delegation logs

| Country | Site                             | Names                     | Role                   |
|---------|----------------------------------|---------------------------|------------------------|
| ~~~     | ~~~                              | Dr Nathalie Casanova      | Clinical/Surgical      |
| ~~~     | ~~~                              | Dr Simon Brown            | Clinical/Surgical      |
| ~~~     | ~~~                              | Mrs Alison Shaw           | Point of contact (1st) |
| ~~~     | ~~~                              | Mrs Pipa Hill             | Point of contact (1st) |
| ~~~     | ~~~                              | Ms Helen Henson           | Point of contact (1st) |
| ~~~     | ~~~                              | Ms Maxine Briggs          | Point of contact (2nd) |
| ~~~     | ~~~                              | Mrs Sharron Parkinson     | Research Nurse         |
| ~~~     | ~~~                              | Ms Judy McAlister         | Research Nurse         |
| ~~~     | ~~~                              | Ms Louise Binns           | Research Nurse         |
| ~~~     | ~~~                              | Mrs Jasmine Hartley       | Research Asst          |
| ~~~     | ~~~                              | Dr Katy Clark             | Other                  |
| UK      | Aylesbury: Stoke Mandeville Hosp | Dr Katherine Hyde         | Site PI                |
| ~~~     | ~~~                              | Dr Ami Sabharwal          | Clinical/Surgical      |
| ~~~     | ~~~                              | Dr Andrew Weaver          | Clinical/Surgical      |
| ~~~     | ~~~                              | Dr Christopher Alcock     | Clinical/Surgical      |
| ~~~     | ~~~                              | Dr Joanne Brady           | Clinical/Surgical      |
| ~~~     | ~~~                              | Dr Niki Panakis           | Clinical/Surgical      |
| ~~~     | ~~~                              | Dr Philip Camilleri       | Clinical/Surgical      |
| ~~~     | ~~~                              | Dr Thinn Pwint            | Clinical/Surgical      |
| ~~~     | ~~~                              | Dr Janice Carpenter       | Point of contact (1st) |
| ~~~     | ~~~                              | Mrs Alice Ngumo           | Point of contact (1st) |
| ~~~     | ~~~                              | Mrs Cheryl Padilla-Harris | Research Nurse         |
| ~~~     | ~~~                              | Mrs Gail Varley           | Research Nurse         |
| ~~~     | ~~~                              | Mrs Tracey Stammers       | Research Nurse         |
| ~~~     | ~~~                              | Ms Emma Hogbin            | Research Nurse         |
| ~~~     | ~~~                              | Ms Hazel Wynn             | Research Nurse         |
| ~~~     | ~~~                              | Ms Helena Stone           | Research Nurse         |
| ~~~     | ~~~                              | Ms Roisin Kavanagh        | Pharmacist             |
| UK      | Ayr: Ayr Hosp                    | Dr Nicholas Macleod       | Site PI                |
| ~~~     | ~~~                              | Dr Aisha Tufail           | Clinical/Surgical      |
| ~~~     | ~~~                              | Dr Aqilah Othman          | Clinical/Surgical      |
| ~~~     | ~~~                              | Dr Hilary Glen            | Clinical/Surgical      |
| ~~~     | ~~~                              | Dr Janet Graham           | Clinical/Surgical      |
| ~~~     | ~~~                              | Dr Jawaher Ansari         | Clinical/Surgical      |



## INVESTIGATORS AND COLLABORATORS: SITE STAFF

Staff on site delegation logs

| Country | Site                                  | Names                 | Role                   |
|---------|---------------------------------------|-----------------------|------------------------|
| ~~~     | ~~~                                   | Dr Maryon Hardie      | Clinical/Surgical      |
| ~~~     | ~~~                                   | Dr Nick Mcleod        | Clinical/Surgical      |
| ~~~     | ~~~                                   | Dr Patricia Roxburgh  | Clinical/Surgical      |
| ~~~     | ~~~                                   | Dr Rana Mahmood       | Clinical/Surgical      |
| ~~~     | ~~~                                   | Miss Kristy Ross      | Clinical/Surgical      |
| ~~~     | ~~~                                   | Ms Claudia Coubrough  | Point of contact (1st) |
| ~~~     | ~~~                                   | Ms Claudia Turley     | Point of contact (1st) |
| ~~~     | ~~~                                   | Mr Mark Wilson        | Research Nurse         |
| ~~~     | ~~~                                   | Mrs Jane McClements   | Research Nurse         |
| ~~~     | ~~~                                   | Ms Chloe Cowan        | Research Nurse         |
| ~~~     | ~~~                                   | Ms Margaret McKernan  | Research Nurse         |
| ~~~     | ~~~                                   | Ms Maureen Templeton  | Research Nurse         |
| ~~~     | ~~~                                   | Mr Philip Cannon      | Trial Coordinator      |
| ~~~     | ~~~                                   | Ms Clare Love         | Data Manager           |
| ~~~     | ~~~                                   | Ms Elaine Allan       | Administrator          |
| ~~~     | ~~~                                   | Mr Brian McGlynn      | Other                  |
| ~~~     | ~~~                                   | Mr Ross Carruthers    | Other                  |
| UK      | Bangor: Ysbyty Gwynedd                | Dr Nikhil Oommen      | Site PI                |
| ~~~     | ~~~                                   | Dr Rachel Williams    | Clinical/Surgical      |
| ~~~     | ~~~                                   | Dr Thomas Coventry    | Clinical/Surgical      |
| ~~~     | ~~~                                   | Dr Zulfiqer Ali       | Clinical/Surgical      |
| ~~~     | ~~~                                   | Mr Gareth Jones       | Point of contact (1st) |
| ~~~     | ~~~                                   | Ms Dianne Thomas      | Point of contact (1st) |
| ~~~     | ~~~                                   | Mrs Caryl Butterworth | Research Nurse         |
| ~~~     | ~~~                                   | Ms Rebecca Burns      | Research Nurse         |
| ~~~     | ~~~                                   | Ms Wendy Saxton       | Research Nurse         |
| ~~~     | ~~~                                   | Sister Hayley Tapping | Research Nurse         |
| ~~~     | ~~~                                   | Mr Sion Lewis         | Trial Coordinator      |
| ~~~     | ~~~                                   | Mrs Angela Evans      | Trial Coordinator      |
| ~~~     | ~~~                                   | Miss Kelly Andrews    | Administrator          |
| ~~~     | ~~~                                   | Miss Rachel Thomas    | Administrator          |
| ~~~     | ~~~                                   | Ms Beth Walker        | MDT coordinator        |
| ~~~     | ~~~                                   | Ms Susan Owen         | Radiographer           |
| UK      | Barnstaple: North Devon District Hosp | Dr Mohini Varughese   | Site PI                |

## INVESTIGATORS AND COLLABORATORS: SITE STAFF

Staff on site delegation logs

| Country | Site                                            | Names                       | Role                   |
|---------|-------------------------------------------------|-----------------------------|------------------------|
| ~~~     | ~~~                                             | Dr Anne McCormack           | Clinical/Surgical      |
| ~~~     | ~~~                                             | Dr Denise Sheehan           | Clinical/Surgical      |
| ~~~     | ~~~                                             | Dr Elizabeth Kershaw        | Clinical/Surgical      |
| ~~~     | ~~~                                             | Dr Elizabeth Toy            | Clinical/Surgical      |
| ~~~     | ~~~                                             | Dr Maria Martinez           | Clinical/Surgical      |
| ~~~     | ~~~                                             | Dr Victoria Ford            | Clinical/Surgical      |
| ~~~     | ~~~                                             | Ms Becky Holbrook           | Point of contact (1st) |
| ~~~     | ~~~                                             | Mrs Susan Collard           | Research Nurse         |
| ~~~     | ~~~                                             | Mrs Samantha Ley            | Trial Coordinator      |
| ~~~     | ~~~                                             | Ms Frances Goodhind         | Pharmacist             |
| ~~~     | ~~~                                             | Mrs Lynne Van-Koutrik       | Other                  |
| UK      | Basingstoke: Basingstoke & North Hampshire Hosp | Dr Richard Shaffer          | Site PI                |
| ~~~     | ~~~                                             | Dr Sangeeta Paisey          | Site PI                |
| ~~~     | ~~~                                             | Dr Hilawati Yusof           | Clinical/Surgical      |
| ~~~     | ~~~                                             | Dr Katherine Aitken         | Clinical/Surgical      |
| ~~~     | ~~~                                             | Dr Rosalyne Westley         | Clinical/Surgical      |
| ~~~     | ~~~                                             | Dr Teresa Guerrero-Urbano   | Clinical/Surgical      |
| ~~~     | ~~~                                             | Beata Krysta                | Point of contact (1st) |
| ~~~     | ~~~                                             | Mrs Abigail Edwards         | Point of contact (1st) |
| ~~~     | ~~~                                             | Mr Godfrey Bownie-Mukumbu   | Point of contact (2nd) |
| ~~~     | ~~~                                             | Miss Rachel Bryan           | Research Nurse         |
| ~~~     | ~~~                                             | Mrs Jackie Smith            | Research Nurse         |
| ~~~     | ~~~                                             | Ms Liz Happle               | Research Nurse         |
| ~~~     | ~~~                                             | Mrs Adrienn Fazekasne Fulep | Trial Coordinator      |
| ~~~     | ~~~                                             | Dr David Barlow             | Data Manager           |
| ~~~     | ~~~                                             | Miss Louise Beattie         | Data Manager           |
| ~~~     | ~~~                                             | Ms Victoria Corner          | Research Asst          |
| ~~~     | ~~~                                             | Ms Julie Gwilt              | Administrator          |
| ~~~     | ~~~                                             | Ms Dee Jackman              | MDT coordinator        |
| UK      | Bath: Royal United Hosp                         | Dr Olivera Frim             | Site PI                |
| ~~~     | ~~~                                             | Dr Abigail Jenner           | Clinical/Surgical      |
| ~~~     | ~~~                                             | Dr Christine Elwell         | Clinical/Surgical      |
| ~~~     | ~~~                                             | Dr Hugh Newman              | Clinical/Surgical      |
| ~~~     | ~~~                                             | Dr Jessica Mason            | Clinical/Surgical      |

## INVESTIGATORS AND COLLABORATORS: SITE STAFF

Staff on site delegation logs

| Country | Site                       | Names                             | Role                   |
|---------|----------------------------|-----------------------------------|------------------------|
| ~~~     | ~~~                        | Dr Mark Beresford                 | Clinical/Surgical      |
| ~~~     | ~~~                        | Dr Susan Masson                   | Clinical/Surgical      |
| ~~~     | ~~~                        | Dr Zoe Hudson                     | Clinical/Surgical      |
| ~~~     | ~~~                        | Mr Jonathan McFarlane             | Clinical/Surgical      |
| ~~~     | ~~~                        | Mr Mark Mantle                    | Clinical/Surgical      |
| ~~~     | ~~~                        | Miss Abigail Pocock               | Point of contact (1st) |
| ~~~     | ~~~                        | Mrs Samantha Curtis               | Point of contact (1st) |
| ~~~     | ~~~                        | Ms Bryony Robertson               | Point of contact (2nd) |
| ~~~     | ~~~                        | Mrs Beatrice Hamilton             | Research Nurse         |
| ~~~     | ~~~                        | Mrs Christine Cox                 | Research Nurse         |
| ~~~     | ~~~                        | Mrs Rowan Appleby                 | Research Nurse         |
| ~~~     | ~~~                        | Mrs Ruth Brydon-Hill              | Research Nurse         |
| ~~~     | ~~~                        | Ms Rebecca Wassall                | Research Nurse         |
| ~~~     | ~~~                        | Sister Tania Williams (Née Allen) | Research Nurse         |
| ~~~     | ~~~                        | Ms Eve Tomlinson                  | Administrator          |
| ~~~     | ~~~                        | Miss Joanne Avis                  | Other                  |
| UK      | Belfast: Belfast City Hosp | Prof Joe O'Sullivan               | Site PI                |
| ~~~     | ~~~                        | Dr Aiden Cole                     | Clinical/Surgical      |
| ~~~     | ~~~                        | Dr Darren Mitchell                | Clinical/Surgical      |
| ~~~     | ~~~                        | Dr David Stewart                  | Clinical/Surgical      |
| ~~~     | ~~~                        | Dr Fionnuala Houghton             | Clinical/Surgical      |
| ~~~     | ~~~                        | Dr Jackie Harney                  | Clinical/Surgical      |
| ~~~     | ~~~                        | Dr Jonathan McAleese              | Clinical/Surgical      |
| ~~~     | ~~~                        | Dr Poh Lin Shum                   | Clinical/Surgical      |
| ~~~     | ~~~                        | Dr Ruth Johnston                  | Clinical/Surgical      |
| ~~~     | ~~~                        | Dr Stephen Stranex                | Clinical/Surgical      |
| ~~~     | ~~~                        | Dr Suneil Jain                    | Clinical/Surgical      |
| ~~~     | ~~~                        | Mr Chris Hagan                    | Clinical/Surgical      |
| ~~~     | ~~~                        | Mr Nambi Rajan                    | Clinical/Surgical      |
| ~~~     | ~~~                        | Mr Patrick Keane                  | Clinical/Surgical      |
| ~~~     | ~~~                        | Mr Peter Clarke                   | Point of contact (1st) |
| ~~~     | ~~~                        | Mrs Gail Gilchrist                | Point of contact (2nd) |
| ~~~     | ~~~                        | Mrs Grace Totten                  | Point of contact (2nd) |
| ~~~     | ~~~                        | Ms Emma Hanna                     | Data Manager           |

## INVESTIGATORS AND COLLABORATORS: SITE STAFF

Staff on site delegation logs

| Country | Site                                          | Names                      | Role                   |
|---------|-----------------------------------------------|----------------------------|------------------------|
| ~~~     | ~~~                                           | Miss Jane Cousins          | Radiographer           |
| ~~~     | ~~~                                           | Miss Karen McKenna         | Radiographer           |
| ~~~     | ~~~                                           | Miss Stacey Murray         | Radiographer           |
| ~~~     | ~~~                                           | Mrs Stacey Hetherington    | Radiographer           |
| ~~~     | ~~~                                           | Ms Grace Brown             | Radiographer           |
| ~~~     | ~~~                                           | Dr Ciara Lyons             | Other                  |
| ~~~     | ~~~                                           | Mrs Jo McAllister          | Other                  |
| ~~~     | ~~~                                           | Ms Sharon Hynds            | Other                  |
| UK      | Birmingham: Birmingham Heartlands Hosp        | Dr Anjali Zarkar           | Site PI                |
| ~~~     | ~~~                                           | Mrs Kavitha Shetty         | Clinical/Surgical      |
| ~~~     | ~~~                                           | Ms Rachel Lokes            | Point of contact (1st) |
| ~~~     | ~~~                                           | Ms Sundip Sohanpal         | Point of contact (1st) |
| ~~~     | ~~~                                           | Mrs Madhura Chandrashekara | Point of contact (2nd) |
| ~~~     | ~~~                                           | Ms Ann Schumacher          | Point of contact (2nd) |
| ~~~     | ~~~                                           | Mrs Ellen Drew             | Research Nurse         |
| ~~~     | ~~~                                           | Mrs Tina Gamble            | Research Nurse         |
| ~~~     | ~~~                                           | Ms Mary (Ellen) Drew       | Research Nurse         |
| ~~~     | ~~~                                           | Mr James Whitehouse        | Trial Coordinator      |
| ~~~     | ~~~                                           | Mrs Julie Fletcher         | Trial Coordinator      |
| UK      | Birmingham: Good Hope Hosp                    | Dr Daniel Ford             | Site PI                |
| ~~~     | ~~~                                           | Dr John Glaholm            | Clinical/Surgical      |
| ~~~     | ~~~                                           | Miss Rachael O'Beney       | Point of contact (1st) |
| ~~~     | ~~~                                           | Mr Daniel Lenton           | Point of contact (1st) |
| ~~~     | ~~~                                           | Mrs Helen Thomas           | Research Nurse         |
| ~~~     | ~~~                                           | Ms Helen Taylor            | Research Nurse         |
| ~~~     | ~~~                                           | Mr James Whitehouse        | Trial Coordinator      |
| ~~~     | ~~~                                           | Ms Sundip Sohanpal         | Data Manager           |
| UK      | Birmingham: Queen Elizabeth Hosp (Birmingham) | Dr Anjali Zarkar           | Site PI                |
| ~~~     | ~~~                                           | Dr Ahmed El-Modir          | Clinical/Surgical      |
| ~~~     | ~~~                                           | Dr Daniel Ford             | Clinical/Surgical      |
| ~~~     | ~~~                                           | Dr John Glaholm            | Clinical/Surgical      |
| ~~~     | ~~~                                           | Mr A Doherty               | Clinical/Surgical      |
| ~~~     | ~~~                                           | Prof Nicholas James        | Clinical/Surgical      |
| ~~~     | ~~~                                           | Miss Tarandip Samra        | Point of contact (1st) |

## INVESTIGATORS AND COLLABORATORS: SITE STAFF

Staff on site delegation logs

| Country | Site                            | Names                        | Role                   |
|---------|---------------------------------|------------------------------|------------------------|
| ~~~     | ~~~                             | Mrs Liliam Ross              | Point of contact (1st) |
| ~~~     | ~~~                             | Ms Rachel Lokes              | Point of contact (1st) |
| ~~~     | ~~~                             | Miss Josephine Marange       | Research Nurse         |
| ~~~     | ~~~                             | Miss Rebekah Stephens        | Research Nurse         |
| ~~~     | ~~~                             | Mr Andrew Morrison           | Trial Coordinator      |
| ~~~     | ~~~                             | Mr Phillip Watson-Jones      | Trial Coordinator      |
| ~~~     | ~~~                             | Miss Melanie Gunn            | Data Manager           |
| ~~~     | ~~~                             | Miss Zhane Peterkin          | Data Manager           |
| ~~~     | ~~~                             | Mr George Preece             | Data Manager           |
| ~~~     | ~~~                             | Mrs Aliyah Mannan            | Data Manager           |
| ~~~     | ~~~                             | Mr Zayn Qureshi              | MDT coordinator        |
| ~~~     | ~~~                             | Mrs Elizabeth Southgate      | Radiographer           |
| ~~~     | ~~~                             | Mrs Maryanne Okubanjo        | Radiographer           |
| ~~~     | ~~~                             | Mrs Samantha Chetiyawardana  | Radiographer           |
| ~~~     | ~~~                             | Ms Darlletta Olaniyi-Oduntan | Radiographer           |
| ~~~     | ~~~                             | Ms Liz Kedge                 | Radiographer           |
| ~~~     | ~~~                             | Dr Robert Stevenson          | Other                  |
| UK      | Blackburn: Burnley General Hosp | Dr Omi Parikh                | Site PI                |
| ~~~     | ~~~                             | Dr Catherine Thompson        | Clinical/Surgical      |
| ~~~     | ~~~                             | Dr Danya Abdulwahid          | Clinical/Surgical      |
| ~~~     | ~~~                             | Dr Imran Haidar              | Clinical/Surgical      |
| ~~~     | ~~~                             | Dr Jennifer King             | Clinical/Surgical      |
| ~~~     | ~~~                             | Dr Marcus Wise               | Clinical/Surgical      |
| ~~~     | ~~~                             | Dr Natalie Charnley          | Clinical/Surgical      |
| ~~~     | ~~~                             | Dr Parth Desai               | Clinical/Surgical      |
| ~~~     | ~~~                             | Mrs Jacqueline Thomas        | Point of contact (1st) |
| ~~~     | ~~~                             | Ms Jeanette Hargreaves       | Point of contact (1st) |
| ~~~     | ~~~                             | Mrs Janet Ryan-Smith         | Point of contact (2nd) |
| ~~~     | ~~~                             | Mrs Angela Hugill            | Research Nurse         |
| ~~~     | ~~~                             | Mrs Helen Frankland          | Research Nurse         |
| ~~~     | ~~~                             | Mrs Lynsey Waring            | Research Nurse         |
| ~~~     | ~~~                             | Ms Diane Forrest             | Research Nurse         |
| ~~~     | ~~~                             | Ms Jan Flaherty              | Research Nurse         |
| ~~~     | ~~~                             | Ms Karen Beard               | Research Nurse         |

## INVESTIGATORS AND COLLABORATORS: SITE STAFF

Staff on site delegation logs

| Country | Site                            | Names                  | Role                   |
|---------|---------------------------------|------------------------|------------------------|
| ~~~     | ~~~                             | Ms Karen Jewers        | Research Nurse         |
| ~~~     | ~~~                             | Ms Karen Riley         | Research Nurse         |
| ~~~     | ~~~                             | Ms Sarah Ainsworth     | Research Nurse         |
| ~~~     | ~~~                             | Ms Sarah Keith         | Research Nurse         |
| ~~~     | ~~~                             | Mrs Sue Ashworth       | Trial Coordinator      |
| ~~~     | ~~~                             | Miss Bethany Fielding  | Other                  |
| ~~~     | ~~~                             | Mr Stephen Kilroy      | Other                  |
| ~~~     | ~~~                             | Ms Joanne Henry        | Other                  |
| ~~~     | ~~~                             | Ms Vivienne Tickle     | Other                  |
| UK      | Blackburn: Royal Blackburn Hosp | Dr Omi Parikh          | Site PI                |
| ~~~     | ~~~                             | Dr Catherine Thompson  | Clinical/Surgical      |
| ~~~     | ~~~                             | Dr Danya Abdulwahid    | Clinical/Surgical      |
| ~~~     | ~~~                             | Dr Imran Haidar        | Clinical/Surgical      |
| ~~~     | ~~~                             | Dr Jennifer King       | Clinical/Surgical      |
| ~~~     | ~~~                             | Dr Marcus Wise         | Clinical/Surgical      |
| ~~~     | ~~~                             | Dr Parth Desai         | Clinical/Surgical      |
| ~~~     | ~~~                             | Ms Jeanette Hargreaves | Point of contact (1st) |
| ~~~     | ~~~                             | Mrs Janet Ryan-Smith   | Point of contact (2nd) |
| ~~~     | ~~~                             | Mrs Lynsey Waring      | Point of contact (2nd) |
| ~~~     | ~~~                             | Mrs Angela Hugill      | Research Nurse         |
| ~~~     | ~~~                             | Mrs Helen Frankland    | Research Nurse         |
| ~~~     | ~~~                             | Ms Diane Forrest       | Research Nurse         |
| ~~~     | ~~~                             | Ms Jan Flaherty        | Research Nurse         |
| ~~~     | ~~~                             | Ms Karen Beard         | Research Nurse         |
| ~~~     | ~~~                             | Ms Karen Jewers        | Research Nurse         |
| ~~~     | ~~~                             | Ms Karen Riley         | Research Nurse         |
| ~~~     | ~~~                             | Ms Louise Dawson       | Research Nurse         |
| ~~~     | ~~~                             | Ms Sarah Ainsworth     | Research Nurse         |
| ~~~     | ~~~                             | Ms Sarah Keith         | Research Nurse         |
| ~~~     | ~~~                             | Mrs Julie Ditchfield   | Trial Coordinator      |
| ~~~     | ~~~                             | Mrs Sue Ashworth       | Trial Coordinator      |
| ~~~     | ~~~                             | Miss Bethany Fielding  | Other                  |
| ~~~     | ~~~                             | Mr Stephen Kilroy      | Other                  |
| ~~~     | ~~~                             | Ms Joanne Henry        | Other                  |

## INVESTIGATORS AND COLLABORATORS: SITE STAFF

Staff on site delegation logs

| Country | Site                                | Names                             | Role                   |
|---------|-------------------------------------|-----------------------------------|------------------------|
| ~~~     | ~~~                                 | Ms Vivienne Tickle                | Other                  |
| UK      | Bodelwyddan: Glan Clwyd Hosp        | Dr Nikhil Oommen                  | Site PI                |
| ~~~     | ~~~                                 | Dr Aileen Flavin                  | Clinical/Surgical      |
| ~~~     | ~~~                                 | Dr Amir Al-Samarraie              | Clinical/Surgical      |
| ~~~     | ~~~                                 | Dr Zulfiqer Ali                   | Clinical/Surgical      |
| ~~~     | ~~~                                 | Mr H Toussi                       | Clinical/Surgical      |
| ~~~     | ~~~                                 | Mr Vaiku Srinivasan               | Clinical/Surgical      |
| ~~~     | ~~~                                 | Miss Rachel Manley                | Point of contact (1st) |
| ~~~     | ~~~                                 | Mrs Jane Heron                    | Point of contact (1st) |
| ~~~     | ~~~                                 | Mrs Llinos Davies                 | Point of contact (1st) |
| ~~~     | ~~~                                 | Ms Heather Thomas                 | Point of contact (1st) |
| ~~~     | ~~~                                 | Mrs Charley-Anne Rutter           | Research Nurse         |
| ~~~     | ~~~                                 | Mrs Joanne Lewis                  | Research Nurse         |
| ~~~     | ~~~                                 | Ms Jane Stockport                 | Research Nurse         |
| ~~~     | ~~~                                 | Sister Hayley Tapping             | Research Nurse         |
| ~~~     | ~~~                                 | Miss Faye Hughes                  | Trial Coordinator      |
| ~~~     | ~~~                                 | Mrs Kim Jackson                   | Trial Coordinator      |
| ~~~     | ~~~                                 | Ms Annette Bolger                 | Data Manager           |
| ~~~     | ~~~                                 | Ms Cathryn Wood                   | Radiographer           |
| ~~~     | ~~~                                 | Dr Nick Smith                     | Other                  |
| UK      | Boston: Pilgrim Hosp                | Dr Thiagarajan Sreenivasan        | Site PI                |
| ~~~     | ~~~                                 | Dr Miguel Panades                 | Clinical/Surgical      |
| ~~~     | ~~~                                 | Mr Simon Archer                   | Point of contact (1st) |
| ~~~     | ~~~                                 | Mrs Kinga Szymiczek               | Point of contact (1st) |
| ~~~     | ~~~                                 | Ms Amy Kirkby                     | Point of contact (1st) |
| ~~~     | ~~~                                 | Ms Joanne Fletcher                | Point of contact (1st) |
| ~~~     | ~~~                                 | Ms Tara Lawrence nee Palmer       | Point of contact (1st) |
| ~~~     | ~~~                                 | Miss Karen Metcalf                | Research Nurse         |
| ~~~     | ~~~                                 | Mrs Isobel Thomas                 | Research Nurse         |
| ~~~     | ~~~                                 | Mrs Victoria Knight (n. Sherburn) | Research Nurse         |
| ~~~     | ~~~                                 | Ms Anita Young                    | Research Nurse         |
| ~~~     | ~~~                                 | Ms Helen Ginnelly                 | Research Nurse         |
| ~~~     | ~~~                                 | Mrs Beverley Mashegede            | Data Manager           |
| UK      | Bournemouth: Royal Bournemouth Hosp | Dr Sue Brock                      | Site PI                |

## INVESTIGATORS AND COLLABORATORS: SITE STAFF

Staff on site delegation logs

| Country | Site                               | Names                   | Role                   |
|---------|------------------------------------|-------------------------|------------------------|
| ~~~     | ~~~                                | Dr Joseph Davies        | Clinical/Surgical      |
| ~~~     | ~~~                                | Ms Sarah Savage         | Point of contact (1st) |
| ~~~     | ~~~                                | Mrs Nicky Naraine       | Research Nurse         |
| ~~~     | ~~~                                | Ms Eve Broadley         | Research Nurse         |
| ~~~     | ~~~                                | Ms Stephanie Jones      | Research Nurse         |
| ~~~     | ~~~                                | Miss Laura Purandare    | Data Manager           |
| ~~~     | ~~~                                | Miss Taslima Rabbi      | Data Manager           |
| ~~~     | ~~~                                | Mr Luke Vamplew         | Data Manager           |
| ~~~     | ~~~                                | Ms Kate Preece          | Data Manager           |
| ~~~     | ~~~                                | Ms Ruby McCully         | Administrator          |
| UK      | Bradford: Bradford Royal Inf       | Dr Sree Rodda           | Site PI                |
| ~~~     | ~~~                                | Dr Ann Henry            | Clinical/Surgical      |
| ~~~     | ~~~                                | Dr Lisa Owen            | Clinical/Surgical      |
| ~~~     | ~~~                                | Dr Louise Karsera       | Clinical/Surgical      |
| ~~~     | ~~~                                | Dr Mark Teo             | Clinical/Surgical      |
| ~~~     | ~~~                                | Ms Chandran Nallathambi | Clinical/Surgical      |
| ~~~     | ~~~                                | Ms Shefali Parikh       | Clinical/Surgical      |
| ~~~     | ~~~                                | Miss Jannika Lazarte    | Point of contact (1st) |
| ~~~     | ~~~                                | Mrs Jane Sewell         | Point of contact (1st) |
| ~~~     | ~~~                                | Miss Lucille Kenyon     | Research Nurse         |
| ~~~     | ~~~                                | Mrs Hayley Inman        | Research Nurse         |
| ~~~     | ~~~                                | Mrs Helen Robertshaw    | Research Nurse         |
| ~~~     | ~~~                                | Ms Anne Marie Kay       | Research Nurse         |
| ~~~     | ~~~                                | Ms Linda Bamford        | Research Nurse         |
| ~~~     | ~~~                                | Miss Amy Pendrill       | Data Manager           |
| ~~~     | ~~~                                | Mr Richard Benton       | Data Manager           |
| ~~~     | ~~~                                | Miss Eleanor Waldron    | Administrator          |
| ~~~     | ~~~                                | Mrs Dawn McNulty        | Administrator          |
| ~~~     | ~~~                                | Ms Eleanor Moore        | Administrator          |
| ~~~     | ~~~                                | Ms Lauren Cotterill     | MDT coordinator        |
| ~~~     | ~~~                                | Ms Deirdre Naylor       | Pharmacist             |
| ~~~     | ~~~                                | Ms Joanne Price         | Pharmacist             |
| UK      | Brighton: Royal Sussex County Hosp | Dr Angus Robinson       | Site PI                |
| ~~~     | ~~~                                | Dr Andrew Webb          | Clinical/Surgical      |



## INVESTIGATORS AND COLLABORATORS: SITE STAFF

Staff on site delegation logs

| Country | Site                                           | Names                   | Role                   |
|---------|------------------------------------------------|-------------------------|------------------------|
| ~~~     | ~~~                                            | Dr Ashok Nikapota       | Clinical/Surgical      |
| ~~~     | ~~~                                            | Dr David Bloomfield     | Clinical/Surgical      |
| ~~~     | ~~~                                            | Dr Duncan Gilbert       | Clinical/Surgical      |
| ~~~     | ~~~                                            | Dr Fiona McKinna        | Clinical/Surgical      |
| ~~~     | ~~~                                            | Dr Marie Wilkins        | Clinical/Surgical      |
| ~~~     | ~~~                                            | Miss Catherine Hunter   | Point of contact (1st) |
| ~~~     | ~~~                                            | Mr Paul Frattaroli      | Point of contact (1st) |
| ~~~     | ~~~                                            | Ms Jessica Dlodlo       | Point of contact (1st) |
| ~~~     | ~~~                                            | Ms Joanne Brown         | Point of contact (1st) |
| ~~~     | ~~~                                            | Mr Andrew Hart          | Research Nurse         |
| ~~~     | ~~~                                            | Ms Madalena Leitao      | Research Nurse         |
| ~~~     | ~~~                                            | Miss Jean Tremlett      | Trial Coordinator      |
| ~~~     | ~~~                                            | Ms Bobbie Young         | Trial Coordinator      |
| ~~~     | ~~~                                            | Ms Jane Peterson        | Trial Coordinator      |
| ~~~     | ~~~                                            | Ms Tracy Blythe         | Trial Coordinator      |
| ~~~     | ~~~                                            | Miss Samantha Hodges    | Data Manager           |
| ~~~     | ~~~                                            | Ms Carla Chambers       | Data Manager           |
| ~~~     | ~~~                                            | Ms Raneé Lactao         | Data Manager           |
| ~~~     | ~~~                                            | Mr Simon Hooper         | Radiographer           |
| ~~~     | ~~~                                            | Ms Philippa Carr        | Radiographer           |
| UK      | Bristol: Bristol Haematology & Oncology Centre | Dr Amit Bahl            | Site PI                |
| ~~~     | ~~~                                            | Dr Amarnath Challipalli | Clinical/Surgical      |
| ~~~     | ~~~                                            | Dr Mark Beresford       | Clinical/Surgical      |
| ~~~     | ~~~                                            | Dr Paula Wilson         | Clinical/Surgical      |
| ~~~     | ~~~                                            | Dr Serena Hilman        | Clinical/Surgical      |
| ~~~     | ~~~                                            | Dr Susan Masson         | Clinical/Surgical      |
| ~~~     | ~~~                                            | Mr David Gillatt        | Clinical/Surgical      |
| ~~~     | ~~~                                            | Mr Marc Coe             | Point of contact (1st) |
| ~~~     | ~~~                                            | Mr Martin Woods         | Point of contact (1st) |
| ~~~     | ~~~                                            | Ms Vivienne Lee         | Point of contact (1st) |
| ~~~     | ~~~                                            | Mr Matt Baxter          | Point of contact (2nd) |
| ~~~     | ~~~                                            | Miss Mary Kisanga       | Research Nurse         |
| ~~~     | ~~~                                            | Mr Peter Robertson      | Research Nurse         |
| ~~~     | ~~~                                            | Mrs Dorothy Griffiths   | Research Nurse         |

## INVESTIGATORS AND COLLABORATORS: SITE STAFF

Staff on site delegation logs

| Country | Site                    | Names                          | Role                   |
|---------|-------------------------|--------------------------------|------------------------|
| ~~~     | ~~~                     | Miss Amelia Lowe               | Trial Coordinator      |
| ~~~     | ~~~                     | Ms Helen Saldanha              | Trial Coordinator      |
| ~~~     | ~~~                     | Ms Rhiannon Macefield          | Trial Coordinator      |
| ~~~     | ~~~                     | Ms Ruth Pegler                 | Trial Coordinator      |
| ~~~     | ~~~                     | Ms Verity Henson (nee Savidge) | Trial Coordinator      |
| ~~~     | ~~~                     | Mr Robert Hollister            | Data Manager           |
| ~~~     | ~~~                     | Ms Laura Sims                  | Data Manager           |
| ~~~     | ~~~                     | Mrs Lucie Wheeler              | Administrator          |
| ~~~     | ~~~                     | Miss Mary Simmonds             | Radiographer           |
| ~~~     | ~~~                     | Mrs Sarah Zelle                | Radiographer           |
| ~~~     | ~~~                     | Mrs Sue Cowley                 | Radiographer           |
| ~~~     | ~~~                     | Mrs Sue Yarrow                 | Radiographer           |
| ~~~     | ~~~                     | Ms Dawn Bowers                 | Radiographer           |
| UK      | Bristol: Southmead Hosp | Mr Raj Persad                  | Site PI                |
| ~~~     | ~~~                     | Dr Amarnath Challipalli        | Clinical/Surgical      |
| ~~~     | ~~~                     | Dr Amit Bahl                   | Clinical/Surgical      |
| ~~~     | ~~~                     | Dr Chris Herbert               | Clinical/Surgical      |
| ~~~     | ~~~                     | Dr Mark Beresford              | Clinical/Surgical      |
| ~~~     | ~~~                     | Dr Paula Wilson                | Clinical/Surgical      |
| ~~~     | ~~~                     | Mr Anthony Koupparis           | Clinical/Surgical      |
| ~~~     | ~~~                     | Mr David Gillatt               | Clinical/Surgical      |
| ~~~     | ~~~                     | Mr Edward Rowe                 | Clinical/Surgical      |
| ~~~     | ~~~                     | Mrs Samantha Clarke            | Point of contact (1st) |
| ~~~     | ~~~                     | Ms Emily Perry                 | Point of contact (1st) |
| ~~~     | ~~~                     | Ms Lyndsey Johnson             | Point of contact (1st) |
| ~~~     | ~~~                     | Ms Marta Cobos-Arrivabene      | Point of contact (1st) |
| ~~~     | ~~~                     | Ms Rebecca Cousins             | Point of contact (1st) |
| ~~~     | ~~~                     | Ms Victoria Garner             | Point of contact (1st) |
| ~~~     | ~~~                     | Ms Carol Brain                 | Point of contact (2nd) |
| ~~~     | ~~~                     | Ms Constance Shiridzinomwa     | Point of contact (2nd) |
| ~~~     | ~~~                     | Ms Kathryn Jones               | Point of contact (2nd) |
| ~~~     | ~~~                     | Mrs Sarah Kirkby               | Research Nurse         |
| ~~~     | ~~~                     | Mrs Suriya Kirkpatrick         | Research Nurse         |
| ~~~     | ~~~                     | Ms Charlotte Phipps            | Research Nurse         |

## INVESTIGATORS AND COLLABORATORS: SITE STAFF

Staff on site delegation logs

| Country | Site                               | Names                      | Role                   |
|---------|------------------------------------|----------------------------|------------------------|
| ~~~     | ~~~                                | Ms Helen Corderoy          | Research Nurse         |
| ~~~     | ~~~                                | Ms Carolyn Smith           | Trial Coordinator      |
| ~~~     | ~~~                                | Ms Kate Alderton           | Trial Coordinator      |
| ~~~     | ~~~                                | Mrs Kerry Richmond-Russell | Data Manager           |
| ~~~     | ~~~                                | Ms Ann Treasure            | Administrator          |
| ~~~     | ~~~                                | Miss Clare Wyatt           | MDT coordinator        |
| ~~~     | ~~~                                | Ms Courtney Manning        | MDT coordinator        |
| ~~~     | ~~~                                | Dr Jon Oxley               | Other                  |
| ~~~     | ~~~                                | Mr Luke Shelton            | Other                  |
| ~~~     | ~~~                                | Mr Mohamed Abd Alazeez     | Other                  |
| ~~~     | ~~~                                | Ms Gail Kemp               | Other                  |
| ~~~     | ~~~                                | Ms Helen Chilcott          | Other                  |
| UK      | Cambridge: Addenbrooke's Hosp      | Dr Yvonne Rimmer           | Site PI                |
| ~~~     | ~~~                                | Dr Cathryn Woodward        | Clinical/Surgical      |
| ~~~     | ~~~                                | Dr Danish Mazhar           | Clinical/Surgical      |
| ~~~     | ~~~                                | Dr Helen Patterson         | Clinical/Surgical      |
| ~~~     | ~~~                                | Dr Luke Hughes-Davies      | Clinical/Surgical      |
| ~~~     | ~~~                                | Dr Ramya Ramanujachar      | Clinical/Surgical      |
| ~~~     | ~~~                                | Dr Richard Benson          | Clinical/Surgical      |
| ~~~     | ~~~                                | Dr Robert Thomas           | Clinical/Surgical      |
| ~~~     | ~~~                                | Dr Sanjay Raj              | Clinical/Surgical      |
| ~~~     | ~~~                                | Dr Simon Russell           | Clinical/Surgical      |
| ~~~     | ~~~                                | Ms Juliette Harnwell       | Point of contact (1st) |
| ~~~     | ~~~                                | Mr Matthew Stone           | Point of contact (2nd) |
| ~~~     | ~~~                                | Miss Vicky Joslin          | Trial Coordinator      |
| ~~~     | ~~~                                | Mrs Vanessa Goss           | Trial Coordinator      |
| ~~~     | ~~~                                | Ms Angelique Laubscher     | Administrator          |
| ~~~     | ~~~                                | Ms Ellie Couch             | Administrator          |
| ~~~     | ~~~                                | Ms Katherine Beesley       | Administrator          |
| ~~~     | ~~~                                | Mrs Sue Foxwell            | MDT coordinator        |
| ~~~     | ~~~                                | Miss Nicola Robinson       | Radiographer           |
| ~~~     | ~~~                                | Mrs Jo Treeby              | Radiographer           |
| ~~~     | ~~~                                | Ms Kathryn Vickery         | Radiographer           |
| UK      | Canterbury: Kent & Canterbury Hosp | Dr Rakesh Raman            | Site PI                |

## INVESTIGATORS AND COLLABORATORS: SITE STAFF

Staff on site delegation logs

| Country | Site | Names                   | Role                   |
|---------|------|-------------------------|------------------------|
| ~~~     | ~~~  | Dr Albert Edwards       | Clinical/Surgical      |
| ~~~     | ~~~  | Dr Alice Rendall        | Clinical/Surgical      |
| ~~~     | ~~~  | Dr Carys Thomas         | Clinical/Surgical      |
| ~~~     | ~~~  | Dr Christos Mikropoulos | Clinical/Surgical      |
| ~~~     | ~~~  | Dr Clary Evans          | Clinical/Surgical      |
| ~~~     | ~~~  | Dr Gemma Hegarty        | Clinical/Surgical      |
| ~~~     | ~~~  | Dr Ilyas Ahmed          | Clinical/Surgical      |
| ~~~     | ~~~  | Dr Ioannis Trigonis     | Clinical/Surgical      |
| ~~~     | ~~~  | Dr Jessica Gough        | Clinical/Surgical      |
| ~~~     | ~~~  | Dr Jessica Little       | Clinical/Surgical      |
| ~~~     | ~~~  | Dr Joao Galante         | Clinical/Surgical      |
| ~~~     | ~~~  | Dr Kannon Nathan        | Clinical/Surgical      |
| ~~~     | ~~~  | Dr Natasha Mithal       | Clinical/Surgical      |
| ~~~     | ~~~  | Dr Patryk Brulinski     | Clinical/Surgical      |
| ~~~     | ~~~  | Dr Rohit Malde          | Clinical/Surgical      |
| ~~~     | ~~~  | Dr Van Sim              | Clinical/Surgical      |
| ~~~     | ~~~  | Mr Arafat Mirza         | Clinical/Surgical      |
| ~~~     | ~~~  | Mrs Laura Kehoe         | Point of contact (1st) |
| ~~~     | ~~~  | Mrs Laura Mould         | Point of contact (1st) |
| ~~~     | ~~~  | Mrs Louise Gladwell     | Point of contact (1st) |
| ~~~     | ~~~  | Mrs Julie Buckley       | Research Nurse         |
| ~~~     | ~~~  | Ms Carolyn Hargreaves   | Research Nurse         |
| ~~~     | ~~~  | Ms Elizabeth Williamson | Research Nurse         |
| ~~~     | ~~~  | Ms Joanne Williams      | Research Nurse         |
| ~~~     | ~~~  | Ms Julie-Ann Davies     | Research Nurse         |
| ~~~     | ~~~  | Ms Michelle Swann       | Research Nurse         |
| ~~~     | ~~~  | Ms Pauline Wood         | Research Nurse         |
| ~~~     | ~~~  | Ms Rachel Ryan          | Research Nurse         |
| ~~~     | ~~~  | Ms Susan Drakeley       | Research Nurse         |
| ~~~     | ~~~  | Sister Denise Crawford  | Research Nurse         |
| ~~~     | ~~~  | Mrs Rachel Larkins      | Trial Coordinator      |
| ~~~     | ~~~  | Ms Bonny Appleby        | Trial Coordinator      |
| ~~~     | ~~~  | Ms Hilary Zurakovsky    | Trial Coordinator      |
| ~~~     | ~~~  | Ms Karen Robinson       | Trial Coordinator      |

## INVESTIGATORS AND COLLABORATORS: SITE STAFF

Staff on site delegation logs

| Country | Site                                | Names                            | Role                   |
|---------|-------------------------------------|----------------------------------|------------------------|
| ~~~     | ~~~                                 | Ms Marian Wood                   | Trial Coordinator      |
| ~~~     | ~~~                                 | Ms Sharon Middleton              | Trial Coordinator      |
| ~~~     | ~~~                                 | Mrs Laura Mould                  | Administrator          |
| ~~~     | ~~~                                 | Ms Lorraine Tasker               | MDT coordinator        |
| ~~~     | ~~~                                 | Miss Katy Taylor                 | Radiographer           |
| ~~~     | ~~~                                 | Miss Natalie Catt                | Radiographer           |
| ~~~     | ~~~                                 | Ms Helen Coppins                 | Radiographer           |
| ~~~     | ~~~                                 | Ms Karen Walker                  | Radiographer           |
| ~~~     | ~~~                                 | Ms Margaret Lipsham              | Radiographer           |
| UK      | Cardiff: University Hosp of Wales   | Mr Krishna Narahari              | Site PI                |
| ~~~     | ~~~                                 | Dr John Staffurth                | Clinical/Surgical      |
| ~~~     | ~~~                                 | Mr Owen Hughes                   | Clinical/Surgical      |
| ~~~     | ~~~                                 | Ms Hin Fan Chan                  | Clinical/Surgical      |
| ~~~     | ~~~                                 | Prof Howard Kynaston             | Clinical/Surgical      |
| ~~~     | ~~~                                 | Prof Malcolm Mason               | Clinical/Surgical      |
| ~~~     | ~~~                                 | Miss Elizabeth Bois (nee Harris) | Point of contact (1st) |
| ~~~     | ~~~                                 | Ms Colette Clements              | Point of contact (1st) |
| ~~~     | ~~~                                 | Mr Kevin Pearse                  | Research Nurse         |
| ~~~     | ~~~                                 | Mrs Clare Jones                  | Research Nurse         |
| ~~~     | ~~~                                 | Mrs Loveness Chikopela           | Research Nurse         |
| ~~~     | ~~~                                 | Mrs Samantha Holliday            | Research Nurse         |
| ~~~     | ~~~                                 | Mrs Helen Clark                  | Data Manager           |
| UK      | Chelmsford: Broomfield Hosp         | Dr Abdel Hamid                   | Site PI                |
| ~~~     | ~~~                                 | Dr Kiran Kancherla               | Clinical/Surgical      |
| ~~~     | ~~~                                 | Dr Priscilla Leone               | Clinical/Surgical      |
| ~~~     | ~~~                                 | Mr Bryan Singizi                 | Point of contact (1st) |
| ~~~     | ~~~                                 | Ms Sian Gibson                   | Point of contact (1st) |
| ~~~     | ~~~                                 | Ms Lauren Perkins                | Point of contact (2nd) |
| ~~~     | ~~~                                 | Ms Mandy Austin                  | Point of contact (2nd) |
| ~~~     | ~~~                                 | Ms Elizabeth Dawson              | Research Nurse         |
| ~~~     | ~~~                                 | Sister Tracey Camburn            | Research Nurse         |
| ~~~     | ~~~                                 | Ms Valerie Ramsay                | Trial Coordinator      |
| ~~~     | ~~~                                 | Mr Christian Barnett             | Data Manager           |
| UK      | Cheltenham: Cheltenham General Hosp | Dr Jo Bowen                      | Site PI                |

## INVESTIGATORS AND COLLABORATORS: SITE STAFF

Staff on site delegation logs

| Country | Site                                  | Names                            | Role                   |
|---------|---------------------------------------|----------------------------------|------------------------|
| ~~~     | ~~~                                   | Dr Audrey Cook                   | Clinical/Surgical      |
| ~~~     | ~~~                                   | Dr Chris Shimell                 | Clinical/Surgical      |
| ~~~     | ~~~                                   | Dr Colin Binks                   | Clinical/Surgical      |
| ~~~     | ~~~                                   | Dr Peter Jenkins                 | Clinical/Surgical      |
| ~~~     | ~~~                                   | Dr Roger Owen                    | Clinical/Surgical      |
| ~~~     | ~~~                                   | Dr Sai Jonnada                   | Clinical/Surgical      |
| ~~~     | ~~~                                   | Miss Sarah Beazer                | Point of contact (1st) |
| ~~~     | ~~~                                   | Mr Matthew Tan                   | Point of contact (1st) |
| ~~~     | ~~~                                   | Mrs Julie Allen                  | Point of contact (1st) |
| ~~~     | ~~~                                   | Mrs Kate Trigg-Hogarth           | Point of contact (2nd) |
| ~~~     | ~~~                                   | Miss Amy Skelton                 | Research Nurse         |
| ~~~     | ~~~                                   | Mrs Chris Ford                   | Research Nurse         |
| ~~~     | ~~~                                   | Mrs Elaine Pratten               | Research Nurse         |
| ~~~     | ~~~                                   | Mrs Sue Wronski                  | Research Nurse         |
| ~~~     | ~~~                                   | Mrs Susan Anderson               | Research Nurse         |
| ~~~     | ~~~                                   | Mrs Barbara Broomfield           | Trial Coordinator      |
| ~~~     | ~~~                                   | Mrs Rachel Sayers                | Trial Coordinator      |
| ~~~     | ~~~                                   | Ms Janet Forkes                  | Trial Coordinator      |
| ~~~     | ~~~                                   | Ms Rehana Bakawala               | Trial Coordinator      |
| ~~~     | ~~~                                   | Mr Nigel Johnson                 | Data Manager           |
| ~~~     | ~~~                                   | Mrs Julia Hall                   | Data Manager           |
| ~~~     | ~~~                                   | Mrs Lin Crossley                 | Data Manager           |
| ~~~     | ~~~                                   | Ms Jennifer Healey-Mariano       | Research Asst          |
| ~~~     | ~~~                                   | Miss Eleanor Andrews (nee Moore) | Administrator          |
| UK      | Chester: Countess of Chester Hosp     | Dr Azman Ibrahim                 | Site PI                |
| ~~~     | ~~~                                   | Miss Elizabeth Gallimore         | Point of contact (1st) |
| ~~~     | ~~~                                   | Mrs Sue Green                    | Point of contact (1st) |
| ~~~     | ~~~                                   | Ms Carys Jones                   | Point of contact (1st) |
| ~~~     | ~~~                                   | Ms Jude Prince                   | Point of contact (1st) |
| ~~~     | ~~~                                   | Ms Mary Aldous                   | Research Nurse         |
| ~~~     | ~~~                                   | Ms Denise Archer                 | Data Manager           |
| ~~~     | ~~~                                   | Ms Helen Eccleson                | Data Manager           |
| UK      | Chesterfield: Chesterfield Royal Hosp | Dr Omar Din                      | Site PI                |
| ~~~     | ~~~                                   | Dr Peter Kirkbride               | Clinical/Surgical      |

## INVESTIGATORS AND COLLABORATORS: SITE STAFF

Staff on site delegation logs

| Country | Site                          | Names                           | Role                   |
|---------|-------------------------------|---------------------------------|------------------------|
| ~~~     | ~~~                           | Ms Lucy Smith                   | Clinical/Surgical      |
| ~~~     | ~~~                           | Ms Lesley Stevenson             | Point of contact (1st) |
| ~~~     | ~~~                           | Ms Vittoria Sorice              | Point of contact (1st) |
| ~~~     | ~~~                           | Mrs Nicky Ford                  | Point of contact (2nd) |
| ~~~     | ~~~                           | Mrs Melanie Chrystal            | Research Nurse         |
| ~~~     | ~~~                           | Ms Julie Toms                   | Research Nurse         |
| ~~~     | ~~~                           | Sister Kim Wood                 | Research Nurse         |
| ~~~     | ~~~                           | Ms Alison Redfearn              | Trial Coordinator      |
| ~~~     | ~~~                           | Miss Alexandra Firth            | Data Manager           |
| ~~~     | ~~~                           | Mr John Martindale              | Data Manager           |
| ~~~     | ~~~                           | Mrs Janine Smedley (nee McCabe) | Data Manager           |
| UK      | Colchester: Essex County Hosp | Dr Dakshinamoorthy Muthu Kumar  | Site PI                |
| ~~~     | ~~~                           | Dr Bruce Sizer                  | Clinical/Surgical      |
| ~~~     | ~~~                           | Dr Devy Basu                    | Clinical/Surgical      |
| ~~~     | ~~~                           | Dr Muthar Kumar                 | Clinical/Surgical      |
| ~~~     | ~~~                           | Dr Priscilla Leone              | Clinical/Surgical      |
| ~~~     | ~~~                           | Mr Louies Mabelin               | Point of contact (1st) |
| ~~~     | ~~~                           | Mrs Liz Hunting                 | Point of contact (1st) |
| ~~~     | ~~~                           | Ms Celine Driscoll              | Point of contact (1st) |
| ~~~     | ~~~                           | Ms Lorna Dewar                  | Trial Coordinator      |
| ~~~     | ~~~                           | Mrs Lucy Thorogood              | Data Manager           |
| ~~~     | ~~~                           | Ms Nyssa Barke                  | Administrator          |
| UK      | Cornwall: Royal Cornwall Hosp | Dr Alastair H Thomson           | Site PI                |
| ~~~     | ~~~                           | Dr Aaron Gould                  | Clinical/Surgical      |
| ~~~     | ~~~                           | Dr Duncan Wheatley              | Clinical/Surgical      |
| ~~~     | ~~~                           | Miss Elizabeth Firth            | Point of contact (1st) |
| ~~~     | ~~~                           | Mr Christopher Hocking          | Point of contact (1st) |
| ~~~     | ~~~                           | Ms Anita Steele                 | Point of contact (1st) |
| ~~~     | ~~~                           | Ms Corrine Penhaligon           | Point of contact (1st) |
| ~~~     | ~~~                           | Miss Alice Topps                | Point of contact (2nd) |
| ~~~     | ~~~                           | Ms Catherine Pentecost          | Point of contact (2nd) |
| ~~~     | ~~~                           | Ms Jane Broom                   | Point of contact (2nd) |
| ~~~     | ~~~                           | Ms Sarah Askew                  | Point of contact (2nd) |
| ~~~     | ~~~                           | Mrs Thea Barlow                 | Research Nurse         |

## INVESTIGATORS AND COLLABORATORS: SITE STAFF

Staff on site delegation logs

| Country | Site                                              | Names                 | Role                   |
|---------|---------------------------------------------------|-----------------------|------------------------|
| ~~~     | ~~~                                               | Mrs Thea Barlow       | Research Nurse         |
| ~~~     | ~~~                                               | Ms Emma Duley         | Research Nurse         |
| ~~~     | ~~~                                               | Ms Emma Kent          | Research Nurse         |
| ~~~     | ~~~                                               | Dr Darren Beech       | Trial Coordinator      |
| ~~~     | ~~~                                               | Miss Melissa Poultney | Data Manager           |
| ~~~     | ~~~                                               | Mr Luke Townley       | Data Manager           |
| ~~~     | ~~~                                               | Mr William Pynsent    | Data Manager           |
| ~~~     | ~~~                                               | Ms Kerena Partridge   | Data Manager           |
| ~~~     | ~~~                                               | Mr John Madine        | Research Asst          |
| ~~~     | ~~~                                               | Miss Louise Johns     | Administrator          |
| ~~~     | ~~~                                               | Mrs Kay Pollard       | Administrator          |
| ~~~     | ~~~                                               | Ms Johanna Skewes     | Pharmacist             |
| UK      | Coventry: University Hosp Coventry & Warwickshire | Dr Jane Worlding      | Site PI                |
| ~~~     | ~~~                                               | Dr Andrew Chan        | Clinical/Surgical      |
| ~~~     | ~~~                                               | Dr Andrew Stockdale   | Clinical/Surgical      |
| ~~~     | ~~~                                               | Dr Caroline Humber    | Clinical/Surgical      |
| ~~~     | ~~~                                               | Dr Medy Tsalic        | Clinical/Surgical      |
| ~~~     | ~~~                                               | Dr Yakhub Khan        | Clinical/Surgical      |
| ~~~     | ~~~                                               | Manreet Thind         | Point of contact (1st) |
| ~~~     | ~~~                                               | Mr Albert Mislang     | Point of contact (1st) |
| ~~~     | ~~~                                               | Ms Kerry Geraghty     | Point of contact (1st) |
| ~~~     | ~~~                                               | Manju Sunny           | Point of contact (2nd) |
| ~~~     | ~~~                                               | Mrs Laura Stanley     | Point of contact (2nd) |
| ~~~     | ~~~                                               | Mrs Elaine Simmons    | Research Nurse         |
| ~~~     | ~~~                                               | Mrs Lesley Hayward    | Research Nurse         |
| ~~~     | ~~~                                               | Mrs Rosaleen Laverick | Research Nurse         |
| ~~~     | ~~~                                               | Ms Fiona Tranter      | Research Nurse         |
| ~~~     | ~~~                                               | Ms Kay Sanders        | Research Nurse         |
| ~~~     | ~~~                                               | Ms Su Ngwenya         | Research Nurse         |
| ~~~     | ~~~                                               | Sister Judith Lake    | Research Nurse         |
| ~~~     | ~~~                                               | Mr Pritpal Panesar    | Trial Coordinator      |
| ~~~     | ~~~                                               | Ms Maggie Brown       | Trial Coordinator      |
| ~~~     | ~~~                                               | Miss Emily Steventon  | Data Manager           |
| ~~~     | ~~~                                               | Mrs Sue Elwell        | Data Manager           |



## INVESTIGATORS AND COLLABORATORS: SITE STAFF

Staff on site delegation logs

| Country | Site                           | Names                         | Role                   |
|---------|--------------------------------|-------------------------------|------------------------|
| ~~~     | ~~~                            | Mrs Theresa Griffiths         | Data Manager           |
| ~~~     | ~~~                            | Miss Melanie Sinfield         | Administrator          |
| ~~~     | ~~~                            | Ms Gemma Mansell              | Administrator          |
| ~~~     | ~~~                            | Ms Marie Connor               | MDT coordinator        |
| UK      | Crewe: Leighton Hosp           | Dr Anna Tran                  | Site PI                |
| ~~~     | ~~~                            | Dr James Wylie                | Clinical/Surgical      |
| ~~~     | ~~~                            | Dr John Logue                 | Clinical/Surgical      |
| ~~~     | ~~~                            | Mr P Irwin                    | Clinical/Surgical      |
| ~~~     | ~~~                            | Mr P Javle                    | Clinical/Surgical      |
| ~~~     | ~~~                            | Miss Adele Hough              | Point of contact (1st) |
| ~~~     | ~~~                            | Mrs Caroline Walker           | Point of contact (1st) |
| ~~~     | ~~~                            | Ms Carolyn Mansfield          | Point of contact (1st) |
| ~~~     | ~~~                            | Ms Joanne Hughes              | Point of contact (1st) |
| ~~~     | ~~~                            | Ms Lesley Sumner              | Point of contact (1st) |
| ~~~     | ~~~                            | Ms Rachel Smith               | Point of contact (1st) |
| ~~~     | ~~~                            | Miss Annabel Tomlinson        | Point of contact (2nd) |
| ~~~     | ~~~                            | Mrs Chris Hough               | Research Nurse         |
| ~~~     | ~~~                            | Ms Vanessa Adamson            | Research Nurse         |
| ~~~     | ~~~                            | Mrs Carole Bennion            | Administrator          |
| ~~~     | ~~~                            | Ms Jenny Butler-Barnes        | Other                  |
| UK      | Derby: Royal Derby Hosp        | Dr Prantik Das                | Site PI                |
| ~~~     | ~~~                            | Dr Dakshinamoorthy Muthukumar | Clinical/Surgical      |
| ~~~     | ~~~                            | Dr Prabir Chakraborti         | Clinical/Surgical      |
| ~~~     | ~~~                            | Mr Pugazhenthii Pattu         | Clinical/Surgical      |
| ~~~     | ~~~                            | Ms Dawn Ennis                 | Point of contact (1st) |
| ~~~     | ~~~                            | Ms Sue Marriott               | Research Nurse         |
| ~~~     | ~~~                            | Mr Colin Ward                 | Pharmacist             |
| UK      | Doncaster: Doncaster Royal Inf | Dr Carmel Pezaro              | Site PI                |
| ~~~     | ~~~                            | Dr Catherine Ferguson         | Clinical/Surgical      |
| ~~~     | ~~~                            | Dr Mymoona Alzouebi           | Clinical/Surgical      |
| ~~~     | ~~~                            | Ms Lucy Smith                 | Clinical/Surgical      |
| ~~~     | ~~~                            | Mrs Nicola Wilkinson          | Point of contact (1st) |
| ~~~     | ~~~                            | Ms Georgia Hooton             | Point of contact (2nd) |
| ~~~     | ~~~                            | Miss Jennifer Taylor          | Research Nurse         |

## INVESTIGATORS AND COLLABORATORS: SITE STAFF

Staff on site delegation logs

| Country | Site                           | Names                           | Role                   |
|---------|--------------------------------|---------------------------------|------------------------|
| ~~~     | ~~~                            | Mrs Amy Neal                    | Research Nurse         |
| ~~~     | ~~~                            | Mrs Nicole Jeffcutt             | Research Nurse         |
| ~~~     | ~~~                            | Ms Barbara Burlace              | Research Nurse         |
| ~~~     | ~~~                            | Sister Kim Wood                 | Research Nurse         |
| ~~~     | ~~~                            | Miss Alexandra Firth            | Data Manager           |
| ~~~     | ~~~                            | Mr John Martindale              | Data Manager           |
| ~~~     | ~~~                            | Mrs Janine Smedley (nee McCabe) | Data Manager           |
| ~~~     | ~~~                            | Dr Virgil Sivoglo               | Other                  |
| UK      | Dorchester: Dorset County Hosp | Dr Benjamin Masters             | Site PI                |
| ~~~     | ~~~                            | Mr Naveed Afzal                 | Site PI                |
| ~~~     | ~~~                            | Dr Perric Crellin               | Clinical/Surgical      |
| ~~~     | ~~~                            | Mr Andrew Cornaby               | Clinical/Surgical      |
| ~~~     | ~~~                            | Mr Stephen Andrews              | Clinical/Surgical      |
| ~~~     | ~~~                            | Mrs Josie Goodsell              | Point of contact (1st) |
| ~~~     | ~~~                            | Ms Kate Taylor                  | Point of contact (1st) |
| ~~~     | ~~~                            | Mr Piet Bakker                  | Research Nurse         |
| ~~~     | ~~~                            | Mr Simon Sharpe                 | Research Nurse         |
| ~~~     | ~~~                            | Mrs Jackie Gibbins              | Research Nurse         |
| ~~~     | ~~~                            | Mrs Sally Love                  | Research Nurse         |
| ~~~     | ~~~                            | Ms Beverley Anderson            | Research Nurse         |
| ~~~     | ~~~                            | Ms Sally Breakspear             | Research Nurse         |
| ~~~     | ~~~                            | Ms Sarah Horton                 | Research Nurse         |
| ~~~     | ~~~                            | Ms Stephanie Jones              | Research Nurse         |
| ~~~     | ~~~                            | Ms Tracy Glen                   | Research Nurse         |
| ~~~     | ~~~                            | Mr Andrew Gibbins               | Data Manager           |
| ~~~     | ~~~                            | Mr Andrew Rees                  | Data Manager           |
| ~~~     | ~~~                            | Ms Suzy Wignall                 | Data Manager           |
| UK      | Dudley: Russells Hall Hosp     | Dr Pek Keng-Koh                 | Site PI                |
| ~~~     | ~~~                            | Dr Prakash Ramachandra          | Clinical/Surgical      |
| ~~~     | ~~~                            | Lesley Jones                    | Point of contact (1st) |
| ~~~     | ~~~                            | Sister Kath Harrow              | Point of contact (1st) |
| ~~~     | ~~~                            | Ms Karen McGarry                | Point of contact (2nd) |
| ~~~     | ~~~                            | Mrs Lucy Smith                  | Research Nurse         |
| ~~~     | ~~~                            | Ms Karen Kanyi                  | Research Nurse         |

## INVESTIGATORS AND COLLABORATORS: SITE STAFF

Staff on site delegation logs

| Country | Site                                         | Names                  | Role                   |
|---------|----------------------------------------------|------------------------|------------------------|
| ~~~     | ~~~                                          | Ms Angela Watts        | Other                  |
| UK      | Eastbourne: Eastbourne District General Hosp | Dr Caroline Manetta    | Site PI                |
| ~~~     | ~~~                                          | Dr Duncan Gilbert      | Clinical/Surgical      |
| ~~~     | ~~~                                          | Dr Fiona McKinna       | Clinical/Surgical      |
| ~~~     | ~~~                                          | Mrs Jo-Anne Taylor     | Point of contact (1st) |
| ~~~     | ~~~                                          | Ms Shelley Baumber     | Point of contact (2nd) |
| ~~~     | ~~~                                          | Mrs Kay Jones-Skipper  | Research Nurse         |
| ~~~     | ~~~                                          | Ms Lauren McCrisken    | Research Nurse         |
| ~~~     | ~~~                                          | Ms Amanda Williams     | Trial Coordinator      |
| ~~~     | ~~~                                          | Ms Joanna Howard       | Data Manager           |
| UK      | Edinburgh: Western General Hosp              | Dr Duncan McLaren      | Site PI                |
| ~~~     | ~~~                                          | Mr Param Mariappan     | Clinical/Surgical      |
| ~~~     | ~~~                                          | Ms Susan Forman        | Point of contact (1st) |
| ~~~     | ~~~                                          | Ms Catherine Woods     | Point of contact (2nd) |
| ~~~     | ~~~                                          | Mrs Barbara Mayne      | Research Nurse         |
| ~~~     | ~~~                                          | Ms Lisa Egan           | Research Nurse         |
| ~~~     | ~~~                                          | Ms Kathleen Fiddes     | Trial Coordinator      |
| ~~~     | ~~~                                          | Mr Brian Rogers        | Data Manager           |
| ~~~     | ~~~                                          | Mr David Jeffrey       | Data Manager           |
| ~~~     | ~~~                                          | Ms Alison Clark        | Data Manager           |
| ~~~     | ~~~                                          | Ms Fiona Gardiner      | Data Manager           |
| ~~~     | ~~~                                          | Ms Maria Clarke        | Data Manager           |
| ~~~     | ~~~                                          | Dr Douglas Young       | Other                  |
| UK      | Exeter: Royal Devon & Exeter Hosp            | Dr Rajaguru Srinivasan | Site PI                |
| ~~~     | ~~~                                          | Dr Victoria Ford       | Site PI                |
| ~~~     | ~~~                                          | Dr Denise Sheehan      | Clinical/Surgical      |
| ~~~     | ~~~                                          | Dr John McGrath        | Clinical/Surgical      |
| ~~~     | ~~~                                          | Mr M Crundwell         | Clinical/Surgical      |
| ~~~     | ~~~                                          | Mr Mark Stott          | Clinical/Surgical      |
| ~~~     | ~~~                                          | Mrs Claire Webb        | Point of contact (1st) |
| ~~~     | ~~~                                          | Mrs Ingrid Seath       | Point of contact (1st) |
| ~~~     | ~~~                                          | Ms Ellen Matkins       | Point of contact (1st) |
| ~~~     | ~~~                                          | Ms Jane Piper          | Point of contact (1st) |
| ~~~     | ~~~                                          | Ms Kizzy Baines        | Point of contact (1st) |

## INVESTIGATORS AND COLLABORATORS: SITE STAFF

Staff on site delegation logs

| Country | Site                                                 | Names                | Role                   |
|---------|------------------------------------------------------|----------------------|------------------------|
| ~~~     | ~~~                                                  | Ms Alison Roantree   | Research Nurse         |
| ~~~     | ~~~                                                  | Ms Elizabeth Davey   | Research Nurse         |
| ~~~     | ~~~                                                  | Ms Shannon McGinley  | Trial Coordinator      |
| ~~~     | ~~~                                                  | Mr John Anderson     | Data Manager           |
| ~~~     | ~~~                                                  | Miss Theresa Lawless | Administrator          |
| ~~~     | ~~~                                                  | Ms Katie Timmings    | Radiographer           |
| UK      | Glasgow: Beatson West of Scotland Cancer Centre      | Dr Azmat Sadozye     | Site PI                |
| ~~~     | ~~~                                                  | Dr Abdulla Al-hasso  | Clinical/Surgical      |
| ~~~     | ~~~                                                  | Dr David Dodds       | Clinical/Surgical      |
| ~~~     | ~~~                                                  | Dr Jan Wallace       | Clinical/Surgical      |
| ~~~     | ~~~                                                  | Dr Martin Russell    | Clinical/Surgical      |
| ~~~     | ~~~                                                  | Dr Norma Sidek       | Clinical/Surgical      |
| ~~~     | ~~~                                                  | Dr Rana Mahmood      | Clinical/Surgical      |
| ~~~     | ~~~                                                  | Dr Rob Jones         | Clinical/Surgical      |
| ~~~     | ~~~                                                  | Mrs Ailsa Griffen    | Point of contact (1st) |
| ~~~     | ~~~                                                  | Niall Finnegan       | Point of contact (1st) |
| ~~~     | ~~~                                                  | Ms Chloe Cowan       | Research Nurse         |
| ~~~     | ~~~                                                  | Ms Lorraine Barwell  | Research Nurse         |
| ~~~     | ~~~                                                  | Ms Antonia MacMillan | Trial Coordinator      |
| ~~~     | ~~~                                                  | Ms Sian Shirley      | Trial Coordinator      |
| ~~~     | ~~~                                                  | Ms Claire Lawless    | Data Manager           |
| ~~~     | ~~~                                                  | Ms Elaine Allan      | Administrator          |
| UK      | Glasgow: The New Victoria ACH (Ambulatory Care Hosp) | Dr Abdulla Al-hasso  | Site PI                |
| ~~~     | ~~~                                                  | Dr Jawaher Ansari    | Clinical/Surgical      |
| ~~~     | ~~~                                                  | Mr Naeem Akhtar      | Clinical/Surgical      |
| ~~~     | ~~~                                                  | Mrs Emma Moody       | Point of contact (1st) |
| ~~~     | ~~~                                                  | Ms Louise Humphreys  | Point of contact (1st) |
| ~~~     | ~~~                                                  | Mrs Karen Bell       | Research Nurse         |
| ~~~     | ~~~                                                  | Ms Claudia Turley    | Research Nurse         |
| ~~~     | ~~~                                                  | Ms Donna McWilliam   | Research Nurse         |
| ~~~     | ~~~                                                  | Ms Rebecca O'Neil    | Research Nurse         |
| ~~~     | ~~~                                                  | Ms Suzannah Peck     | Research Nurse         |
| UK      | Guildford: Royal Surrey County Hosp                  | Dr Chee Goh          | Site PI                |
| ~~~     | ~~~                                                  | Dr Aruna Mediseti    | Clinical/Surgical      |

## INVESTIGATORS AND COLLABORATORS: SITE STAFF

Staff on site delegation logs

| Country | Site                                     | Names                     | Role                   |
|---------|------------------------------------------|---------------------------|------------------------|
| ~~~     | ~~~                                      | Dr Jenny Nobes            | Clinical/Surgical      |
| ~~~     | ~~~                                      | Dr Julian Money-Kyrle     | Clinical/Surgical      |
| ~~~     | ~~~                                      | Dr Richard Shaffer        | Clinical/Surgical      |
| ~~~     | ~~~                                      | Dr Robert Laing           | Clinical/Surgical      |
| ~~~     | ~~~                                      | Dr Sara Khaksar           | Clinical/Surgical      |
| ~~~     | ~~~                                      | Dr Teresa Guerrero-Urbano | Clinical/Surgical      |
| ~~~     | ~~~                                      | Mrs Jules Jones           | Point of contact (1st) |
| ~~~     | ~~~                                      | Ms Laura Matthews         | Point of contact (1st) |
| ~~~     | ~~~                                      | Ms Raidah Auladin         | Point of contact (1st) |
| ~~~     | ~~~                                      | Ms Sarah Stone            | Point of contact (1st) |
| ~~~     | ~~~                                      | Mrs Barbara Molony-Oates  | Research Nurse         |
| ~~~     | ~~~                                      | Mrs Caterina Bissa        | Research Nurse         |
| ~~~     | ~~~                                      | Mrs Jane Woods            | Research Nurse         |
| ~~~     | ~~~                                      | Mrs Min Wu                | Trial Coordinator      |
| ~~~     | ~~~                                      | Ms Daisy May Smale        | Trial Coordinator      |
| ~~~     | ~~~                                      | Ms Frances Sidi           | Administrator          |
| ~~~     | ~~~                                      | Miss Weronika Rabsztyń    | Radiographer           |
| ~~~     | ~~~                                      | Mr Fabio Di Maria         | Radiographer           |
| ~~~     | ~~~                                      | Mr Joshua Harding         | Radiographer           |
| ~~~     | ~~~                                      | Mrs Annie Tindall         | Radiographer           |
| ~~~     | ~~~                                      | Ms Ceri Jamieson          | Radiographer           |
| ~~~     | ~~~                                      | Ms Marianne Dabbs         | Radiographer           |
| ~~~     | ~~~                                      | Ms Stephanie Bird         | Radiographer           |
| UK      | Harlow: Princess Alexandra Hosp (Harlow) | Dr Lucinda Melcher        | Site PI                |
| ~~~     | ~~~                                      | Ms Amelia Daniel          | Point of contact (1st) |
| ~~~     | ~~~                                      | Ms Teresa Light           | Point of contact (1st) |
| ~~~     | ~~~                                      | Ms Lily Robinson          | Point of contact (2nd) |
| ~~~     | ~~~                                      | Ms Nikki Staines          | Point of contact (2nd) |
| ~~~     | ~~~                                      | Ms Amanda Lewis           | Research Nurse         |
| ~~~     | ~~~                                      | Ms Joanne Kellaway        | Research Nurse         |
| ~~~     | ~~~                                      | Ms Evelyn Holmes          | Pharmacist             |
| UK      | Hereford: Hereford County Hosp           | Dr Warren Grant           | Site PI                |
| ~~~     | ~~~                                      | Dr Audrey Cook            | Clinical/Surgical      |
| ~~~     | ~~~                                      | Mr Josh Follows           | Point of contact (1st) |

## INVESTIGATORS AND COLLABORATORS: SITE STAFF

Staff on site delegation logs

| Country | Site                     | Names                    | Role                   |
|---------|--------------------------|--------------------------|------------------------|
| ~~~     | ~~~                      | Mrs Janine Jones (Birch) | Point of contact (1st) |
| ~~~     | ~~~                      | Mrs Melanie Evans        | Point of contact (1st) |
| ~~~     | ~~~                      | Miss Lisa King           | Point of contact (2nd) |
| ~~~     | ~~~                      | Miss Sophie Cooper       | Point of contact (2nd) |
| ~~~     | ~~~                      | Ms Sophie Myles          | Point of contact (2nd) |
| ~~~     | ~~~                      | Miss Nicola Williamson   | Research Nurse         |
| ~~~     | ~~~                      | Miss Serrafina Carini    | Research Nurse         |
| ~~~     | ~~~                      | Mrs Susan Anderson       | Research Nurse         |
| ~~~     | ~~~                      | Ms Claire Hughes         | Research Nurse         |
| ~~~     | ~~~                      | Ms Lily Mercer           | Research Nurse         |
| ~~~     | ~~~                      | Ms Janet Forkes          | Trial Coordinator      |
| ~~~     | ~~~                      | Mrs Zara Roberts         | Data Manager           |
| ~~~     | ~~~                      | Mrs Laura Lees           | Administrator          |
| ~~~     | ~~~                      | Mr Andy Hedges           | Pharmacist             |
| UK      | Herts: Mount Vernon Hosp | Dr Peter Ostler          | Site PI                |
| ~~~     | ~~~                      | Prof Peter Hoskin        | Site PI                |
| ~~~     | ~~~                      | Dr Jeanette Dickson      | Clinical/Surgical      |
| ~~~     | ~~~                      | Dr Nicola Anyamene       | Clinical/Surgical      |
| ~~~     | ~~~                      | Dr Robert Hughes         | Clinical/Surgical      |
| ~~~     | ~~~                      | Dr Roberto Alonzi        | Clinical/Surgical      |
| ~~~     | ~~~                      | Miss Lucy Collins        | Point of contact (1st) |
| ~~~     | ~~~                      | Ms Justina Kailey        | Point of contact (1st) |
| ~~~     | ~~~                      | Ms Justina Kailey        | Point of contact (1st) |
| ~~~     | ~~~                      | Ms Lesley Mitchell       | Point of contact (1st) |
| ~~~     | ~~~                      | Ms Sara Abbassi          | Point of contact (2nd) |
| ~~~     | ~~~                      | Ms Jessica Milner        | Research Nurse         |
| ~~~     | ~~~                      | Ms Julia Bici            | Research Nurse         |
| ~~~     | ~~~                      | Miss Aamna Rashid        | Trial Coordinator      |
| ~~~     | ~~~                      | Ms Paulina Kowalewska    | Trial Coordinator      |
| ~~~     | ~~~                      | Ms Suzanne Jenkins       | Trial Coordinator      |
| ~~~     | ~~~                      | Miss Stephanie Stapleton | Data Manager           |
| ~~~     | ~~~                      | Ms Sandra Garrido-Perez  | Other                  |
| UK      | Hull: Castle Hill Hosp   | Mr Matthew Simms         | Site PI                |
| ~~~     | ~~~                      | Dr Faheem Bashir         | Clinical/Surgical      |

## INVESTIGATORS AND COLLABORATORS: SITE STAFF

Staff on site delegation logs

| Country | Site                     | Names                    | Role                   |
|---------|--------------------------|--------------------------|------------------------|
| ~~~     | ~~~                      | Dr Sanjay Dixit          | Clinical/Surgical      |
| ~~~     | ~~~                      | Mrs Julie Rawlings       | Point of contact (1st) |
| ~~~     | ~~~                      | Mrs Diane Clark          | Point of contact (2nd) |
| ~~~     | ~~~                      | Mrs Linzi Bone           | Research Nurse         |
| ~~~     | ~~~                      | Ms Sarah Palmer          | Research Nurse         |
| ~~~     | ~~~                      | Mr Kristian Plowman      | Data Manager           |
| ~~~     | ~~~                      | Mrs Dawn Jones           | Data Manager           |
| ~~~     | ~~~                      | Mrs Rhian Horne          | Pharmacist             |
| UK      | Inverness: Raigmore Hosp | Dr Neil McPhail          | Site PI                |
| ~~~     | ~~~                      | Dr Alison Nicholls       | Clinical/Surgical      |
| ~~~     | ~~~                      | Dr Aristoula Papakostidi | Clinical/Surgical      |
| ~~~     | ~~~                      | Dr Carol Macgregor       | Clinical/Surgical      |
| ~~~     | ~~~                      | Dr David Whillis         | Clinical/Surgical      |
| ~~~     | ~~~                      | Dr Kay Kelly             | Clinical/Surgical      |
| ~~~     | ~~~                      | Mr Sudhir Borgaonkar     | Clinical/Surgical      |
| ~~~     | ~~~                      | Mrs Rachel Mackay        | Point of contact (1st) |
| ~~~     | ~~~                      | Mr Sean Neville          | Research Nurse         |
| ~~~     | ~~~                      | Mrs Anglise Addison      | Research Nurse         |
| ~~~     | ~~~                      | Mrs Georgina Simpson     | Research Nurse         |
| ~~~     | ~~~                      | Mrs Sandra Brown         | Research Nurse         |
| ~~~     | ~~~                      | Ms Morag McNally         | Research Nurse         |
| ~~~     | ~~~                      | Mrs Alison Macdonald     | Data Manager           |
| ~~~     | ~~~                      | Mrs Seonaid Arnott       | Data Manager           |
| ~~~     | ~~~                      | Ms Anna Skene            | Data Manager           |
| ~~~     | ~~~                      | Ms Glenda Sinclair       | Data Manager           |
| ~~~     | ~~~                      | Ms Debbie Lister         | MDT coordinator        |
| ~~~     | ~~~                      | Mr Jude Madeleine        | Pharmacist             |
| ~~~     | ~~~                      | Ms Audrey Campbell       | Pharmacist             |
| ~~~     | ~~~                      | Ms Zoe Urquhart          | Pharmacist             |
| ~~~     | ~~~                      | Mrs Margaret Cormack     | Radiographer           |
| ~~~     | ~~~                      | Mrs Sheena Telfer        | Radiographer           |
| ~~~     | ~~~                      | Mrs Victoria Doughty     | Radiographer           |
| ~~~     | ~~~                      | Mr Steve Colligan        | Other                  |
| UK      | Ipswich: Ipswich Hosp    | Dr Christopher Scrase    | Site PI                |

## INVESTIGATORS AND COLLABORATORS: SITE STAFF

Staff on site delegation logs

| Country | Site                                      | Names                              | Role                   |
|---------|-------------------------------------------|------------------------------------|------------------------|
| ~~~     | ~~~                                       | Dr Ramachandran Venkitaraman       | Clinical/Surgical      |
| ~~~     | ~~~                                       | Mr Paul Ridley                     | Point of contact (1st) |
| ~~~     | ~~~                                       | Ms Susan Upson                     | Point of contact (1st) |
| ~~~     | ~~~                                       | Mrs Amanda Ford                    | Radiographer           |
| ~~~     | ~~~                                       | Mrs Charlotte Etheridge            | Other                  |
| UK      | Kidderminster: Kidderminster General Hosp | Dr Lisa Capaldi                    | Site PI                |
| ~~~     | ~~~                                       | Dr Mark Churn                      | Clinical/Surgical      |
| ~~~     | ~~~                                       | Mrs Helen Tranter                  | Point of contact (1st) |
| ~~~     | ~~~                                       | Mr Jacob Taylor                    | Point of contact (2nd) |
| ~~~     | ~~~                                       | Mrs Julie Wollaston                | Research Nurse         |
| ~~~     | ~~~                                       | Ms Helen Knott                     | Research Nurse         |
| ~~~     | ~~~                                       | Ms Sally Stringer (pr. Davis)      | Research Nurse         |
| ~~~     | ~~~                                       | Ms Linda Higgins                   | Data Manager           |
| UK      | Larbert: Forth Valley Royal Hosp          | Dr Norma Sidek                     | Site PI                |
| ~~~     | ~~~                                       | Dr Martin Russell                  | Clinical/Surgical      |
| ~~~     | ~~~                                       | Mr James Tweedle                   | Clinical/Surgical      |
| ~~~     | ~~~                                       | Mr Seamus Teahan                   | Clinical/Surgical      |
| ~~~     | ~~~                                       | Miss Stephanie Brogan (nee Roddie) | Point of contact (1st) |
| ~~~     | ~~~                                       | Mrs Lynn Prentice                  | Point of contact (1st) |
| ~~~     | ~~~                                       | Mrs Anne Todd                      | Point of contact (2nd) |
| ~~~     | ~~~                                       | Mrs Lesley Symon                   | Point of contact (2nd) |
| ~~~     | ~~~                                       | Mrs Sally Young                    | Research Nurse         |
| ~~~     | ~~~                                       | Ms Susan Erskine                   | MDT coordinator        |
| ~~~     | ~~~                                       | Mrs Maureen Hamill                 | Other                  |
| UK      | Leeds: St James University Hosp (Leeds)   | Dr David Bottomley                 | Site PI                |
| ~~~     | ~~~                                       | Dr Ann Henry                       | Clinical/Surgical      |
| ~~~     | ~~~                                       | Dr Anne Kiltie                     | Clinical/Surgical      |
| ~~~     | ~~~                                       | Dr Carmel Loughrey                 | Clinical/Surgical      |
| ~~~     | ~~~                                       | Dr Catherine Coyle                 | Clinical/Surgical      |
| ~~~     | ~~~                                       | Dr Ian Boon                        | Clinical/Surgical      |
| ~~~     | ~~~                                       | Mr Edmund Breckin                  | Point of contact (1st) |
| ~~~     | ~~~                                       | Mrs Pam Shuttleworth               | Point of contact (1st) |
| ~~~     | ~~~                                       | Ms Beccy Smith                     | Point of contact (1st) |
| ~~~     | ~~~                                       | Mrs Jude Clarke                    | Research Nurse         |



## INVESTIGATORS AND COLLABORATORS: SITE STAFF

Staff on site delegation logs

| Country | Site                           | Names                        | Role                   |
|---------|--------------------------------|------------------------------|------------------------|
| ~~~     | ~~~                            | Ms Emily Davies              | Research Nurse         |
| ~~~     | ~~~                            | Ms Gemma Austin (nee Glover) | Research Nurse         |
| ~~~     | ~~~                            | Ms Claire Pratt              | Trial Coordinator      |
| ~~~     | ~~~                            | Ms Fatima Murad              | Trial Coordinator      |
| ~~~     | ~~~                            | Mr James Goulding            | Administrator          |
| ~~~     | ~~~                            | Ms Eleanor Moore             | Administrator          |
| ~~~     | ~~~                            | Ms Gill Smith                | MDT coordinator        |
| UK      | Leicester: Leicester Royal Inf | Dr Subramanian Vasanthan     | Site PI                |
| ~~~     | ~~~                            | Dr Christopher Kent          | Clinical/Surgical      |
| ~~~     | ~~~                            | Dr Lesley Speed              | Clinical/Surgical      |
| ~~~     | ~~~                            | Mr Leyshon Griffiths         | Clinical/Surgical      |
| ~~~     | ~~~                            | Mr Roger Kockelbergh         | Clinical/Surgical      |
| ~~~     | ~~~                            | Ms Janet Potterton           | Point of contact (1st) |
| ~~~     | ~~~                            | Ms Sallyanne Christmas       | Point of contact (2nd) |
| ~~~     | ~~~                            | Mrs Julia Walker             | Research Nurse         |
| ~~~     | ~~~                            | Ms Jill Cooke                | Research Nurse         |
| ~~~     | ~~~                            | Ms Amy Branson (née Dineen)  | Research Asst          |
| ~~~     | ~~~                            | Ms Amy King                  | Administrator          |
| UK      | Lincoln: Lincoln County Hosp   | Dr Thiagarajan Sreenivasan   | Site PI                |
| ~~~     | ~~~                            | Dr Karin Baria               | Clinical/Surgical      |
| ~~~     | ~~~                            | Dr Miguel Panades            | Clinical/Surgical      |
| ~~~     | ~~~                            | Mr Ian Mark                  | Clinical/Surgical      |
| ~~~     | ~~~                            | Mr Nazeer Dahar              | Clinical/Surgical      |
| ~~~     | ~~~                            | Mr Pallon Daruwala           | Clinical/Surgical      |
| ~~~     | ~~~                            | Mrs Olesya Francis           | Point of contact (1st) |
| ~~~     | ~~~                            | Ms Kathryn Hoare             | Point of contact (1st) |
| ~~~     | ~~~                            | Ms Rachel Newton             | Point of contact (1st) |
| ~~~     | ~~~                            | Mr Andrew Sloan              | Point of contact (2nd) |
| ~~~     | ~~~                            | Mr Simon Archer              | Research Nurse         |
| ~~~     | ~~~                            | Ms Claire Key                | Research Nurse         |
| ~~~     | ~~~                            | Ms Helen Ginnelly            | Research Nurse         |
| ~~~     | ~~~                            | Ms Sarah Coombs              | Research Nurse         |
| ~~~     | ~~~                            | Miss Samantha Bateman        | Data Manager           |
| ~~~     | ~~~                            | Mrs Jane Hall                | Radiographer           |

## INVESTIGATORS AND COLLABORATORS: SITE STAFF

Staff on site delegation logs

| Country | Site                                       | Names                       | Role                   |
|---------|--------------------------------------------|-----------------------------|------------------------|
| ~~~     | ~~~                                        | Mrs Maryanne Okubanjo       | Radiographer           |
| ~~~     | ~~~                                        | Ms Carol Lockwood           | Radiographer           |
| ~~~     | ~~~                                        | Ms Amy Cunningham           | Other                  |
| UK      | Liverpool: Royal Liverpool University Hosp | Dr Zafar Malik              | Site PI                |
| ~~~     | ~~~                                        | Dr Peter Robson             | Clinical/Surgical      |
| ~~~     | ~~~                                        | Miss Lynsey Dean            | Point of contact (1st) |
| ~~~     | ~~~                                        | Mr Thomas Rogers            | Point of contact (1st) |
| ~~~     | ~~~                                        | Miss Katy Treherne          | Research Nurse         |
| ~~~     | ~~~                                        | Ms Nicola Bermingham        | Research Nurse         |
| ~~~     | ~~~                                        | Ms Pauline Pilkington       | Research Nurse         |
| ~~~     | ~~~                                        | Ms Heather Rogers           | Other                  |
| UK      | London: Charing Cross Hosp                 | Dr Alison Falconer          | Site PI                |
| ~~~     | ~~~                                        | Dr May Stancliffe           | Clinical/Surgical      |
| ~~~     | ~~~                                        | Dr Sathish Harinarayanan    | Clinical/Surgical      |
| ~~~     | ~~~                                        | Dr Simon Stewart            | Clinical/Surgical      |
| ~~~     | ~~~                                        | Mr Ross Dalton-Short        | Point of contact (1st) |
| ~~~     | ~~~                                        | Mr Steve Edwards            | Point of contact (1st) |
| ~~~     | ~~~                                        | Ms Sarah Rezkallah          | Point of contact (1st) |
| ~~~     | ~~~                                        | Ms Sue McInerney            | Point of contact (2nd) |
| ~~~     | ~~~                                        | Nebah Hassan                | Point of contact (2nd) |
| ~~~     | ~~~                                        | Ms Anne-Maree Thoi          | Research Nurse         |
| ~~~     | ~~~                                        | Ms Ibiyemi Sadare (Olaleye) | Research Nurse         |
| ~~~     | ~~~                                        | Ms Amy Ford                 | Trial Coordinator      |
| ~~~     | ~~~                                        | Ms Bindu Chikkamuniyappa    | Trial Coordinator      |
| ~~~     | ~~~                                        | Ms Gillian Hornzee          | Trial Coordinator      |
| ~~~     | ~~~                                        | Miss Anna Westrop           | Administrator          |
| ~~~     | ~~~                                        | Mr Bhavesh Pratap           | Administrator          |
| ~~~     | ~~~                                        | Ms Sophia Magwaro           | Radiographer           |
| ~~~     | ~~~                                        | Ms Amie Bourke              | Other                  |
| UK      | London: Croydon University Hosp            | Mr Babbin John              | Site PI                |
| ~~~     | ~~~                                        | Dr Adham Hijab              | Clinical/Surgical      |
| ~~~     | ~~~                                        | Dr Alison Tree              | Clinical/Surgical      |
| ~~~     | ~~~                                        | Dr Miguel Ferreira          | Clinical/Surgical      |
| ~~~     | ~~~                                        | Dr Priyanka Patel           | Clinical/Surgical      |

## INVESTIGATORS AND COLLABORATORS: SITE STAFF

Staff on site delegation logs

| Country | Site                        | Names                       | Role                   |
|---------|-----------------------------|-----------------------------|------------------------|
| ~~~     | ~~~                         | Dr Robert Huddart           | Clinical/Surgical      |
| ~~~     | ~~~                         | Mr Matthew Perry            | Clinical/Surgical      |
| ~~~     | ~~~                         | Mr Nasr Arsanious           | Clinical/Surgical      |
| ~~~     | ~~~                         | Ms Claire Crowley           | Clinical/Surgical      |
| ~~~     | ~~~                         | Ms Ibiyemi Sadare (Olaleye) | Point of contact (1st) |
| ~~~     | ~~~                         | Mrs Yvonne Campbell         | Point of contact (2nd) |
| ~~~     | ~~~                         | Ms Shaki Balogun            | Point of contact (2nd) |
| ~~~     | ~~~                         | Mrs Ann Payne               | Research Nurse         |
| ~~~     | ~~~                         | Ms Anne Haldeos             | Research Nurse         |
| ~~~     | ~~~                         | Ms Cheryl Batish            | Research Nurse         |
| ~~~     | ~~~                         | Ms Christine Springall      | Research Nurse         |
| ~~~     | ~~~                         | Ms Jane Thompson            | Research Nurse         |
| ~~~     | ~~~                         | Sister Jane Thomson         | Research Nurse         |
| ~~~     | ~~~                         | Mrs Maria Serra             | Research Asst          |
| ~~~     | ~~~                         | Ms Jackie Pach              | Administrator          |
| ~~~     | ~~~                         | Ms Sheefa Ahamadali         | MDT coordinator        |
| ~~~     | ~~~                         | Dr Andriana Michaelidou     | Other                  |
| ~~~     | ~~~                         | Mr Mohammed Nawrozzadeh     | Other                  |
| ~~~     | ~~~                         | Ms Emma Dunne               | Other                  |
| UK      | London: Guy's Hosp (London) | Dr Stephen Morris           | Site PI                |
| ~~~     | ~~~                         | Dr Kannon Nathan            | Clinical/Surgical      |
| ~~~     | ~~~                         | Dr Ronald Beaney            | Clinical/Surgical      |
| ~~~     | ~~~                         | Dr Sarah Harris             | Clinical/Surgical      |
| ~~~     | ~~~                         | Dr Simon Hughes             | Clinical/Surgical      |
| ~~~     | ~~~                         | Dr Teresa Guerrero-Urbano   | Clinical/Surgical      |
| ~~~     | ~~~                         | Ms Gabriella Assante        | Point of contact (1st) |
| ~~~     | ~~~                         | Ms Jessica Rashid           | Point of contact (1st) |
| ~~~     | ~~~                         | Ms Katie Jones              | Point of contact (1st) |
| ~~~     | ~~~                         | Ms Viviana Aya              | Point of contact (1st) |
| ~~~     | ~~~                         | Miss Lorna Bower            | Research Nurse         |
| ~~~     | ~~~                         | Mr Brendan Hore             | Trial Coordinator      |
| ~~~     | ~~~                         | Mr Greg Kuenzig             | Trial Coordinator      |
| ~~~     | ~~~                         | Mrs Vesna Hogan             | Trial Coordinator      |
| ~~~     | ~~~                         | Ms Gabriella Assante        | Trial Coordinator      |

## INVESTIGATORS AND COLLABORATORS: SITE STAFF

Staff on site delegation logs

| Country | Site                         | Names                    | Role                   |
|---------|------------------------------|--------------------------|------------------------|
| ~~~     | ~~~                          | Ms Isabel Grau           | Trial Coordinator      |
| ~~~     | ~~~                          | Mr Hussain Gordon        | Research Asst          |
| ~~~     | ~~~                          | Miss Lisa-Jane Conway    | Radiographer           |
| ~~~     | ~~~                          | Mr Philip Reynolds       | Radiographer           |
| ~~~     | ~~~                          | Ms Sally Donaghey        | Radiographer           |
| ~~~     | ~~~                          | Bali Rooprai             | Other                  |
| ~~~     | ~~~                          | Mrs Dawn Nunney          | Other                  |
| UK      | London: Hammersmith Hosp     | Dr Stephen Mangar        | Site PI                |
| ~~~     | ~~~                          | Dr Simon Stewart         | Clinical/Surgical      |
| ~~~     | ~~~                          | Mr Ross Dalton-Short     | Point of contact (1st) |
| ~~~     | ~~~                          | Mr Steve Edwards         | Point of contact (1st) |
| ~~~     | ~~~                          | Ms Sarah Rezkallah       | Point of contact (1st) |
| ~~~     | ~~~                          | Ms Bindu Chikkamuniyappa | Point of contact (2nd) |
| ~~~     | ~~~                          | Nebah Hassan             | Point of contact (2nd) |
| ~~~     | ~~~                          | Ms Anne-Maree Thoi       | Research Nurse         |
| ~~~     | ~~~                          | Miss Anna Westrop        | Administrator          |
| ~~~     | ~~~                          | Ms Sophia Magwaro        | Radiographer           |
| UK      | London: North Middlesex Hosp | Dr Nishi Gupta           | Site PI                |
| ~~~     | ~~~                          | Dr Farhad Neave          | Clinical/Surgical      |
| ~~~     | ~~~                          | Dr Jackie Newby          | Clinical/Surgical      |
| ~~~     | ~~~                          | Dr Lucinda Melcher       | Clinical/Surgical      |
| ~~~     | ~~~                          | Dr Stephen Karp          | Clinical/Surgical      |
| ~~~     | ~~~                          | Miss Sagal Kullane       | Point of contact (1st) |
| ~~~     | ~~~                          | Ms Judy Hill             | Research Nurse         |
| ~~~     | ~~~                          | Miss Chloe Van Someren   | Data Manager           |
| ~~~     | ~~~                          | Mr Tom Caumont           | Data Manager           |
| ~~~     | ~~~                          | Ms Hanna Azirar          | Data Manager           |
| ~~~     | ~~~                          | Ms Tina Macavoy          | MDT coordinator        |
| UK      | London: Royal Free Hosp      | Dr Sarah Needleman       | Site PI                |
| ~~~     | ~~~                          | Dr Katherine Pigott      | Clinical/Surgical      |
| ~~~     | ~~~                          | Dr Maria Vilarino-Varela | Clinical/Surgical      |
| ~~~     | ~~~                          | Dr Nicola Rosenfelder    | Clinical/Surgical      |
| ~~~     | ~~~                          | Ms Alexandra Gore        | Point of contact (1st) |
| ~~~     | ~~~                          | Ms Claire Jarvis         | Point of contact (1st) |

## INVESTIGATORS AND COLLABORATORS: SITE STAFF

Staff on site delegation logs

| Country | Site                                | Names                        | Role                   |
|---------|-------------------------------------|------------------------------|------------------------|
| ~~~~    | ~~~~                                | Ms Hannah Powell             | Point of contact (1st) |
| ~~~~    | ~~~~                                | Mrs Kaliyane Ramtohol        | Research Nurse         |
| ~~~~    | ~~~~                                | Ms Angela McCadden           | Research Nurse         |
| ~~~~    | ~~~~                                | Ms Juniebel Cooke            | Research Nurse         |
| ~~~~    | ~~~~                                | Ms Lynda Annan               | Research Nurse         |
| ~~~~    | ~~~~                                | Ms Sara Fawcitt              | Research Nurse         |
| ~~~~    | ~~~~                                | Ms Sylvia Grieve             | Research Nurse         |
| ~~~~    | ~~~~                                | Miss Emma Douch              | Trial Coordinator      |
| ~~~~    | ~~~~                                | Ms Naomi Anderson            | Data Manager           |
| UK      | London: Royal Marsden Hosp (London) | Dr Vincent Khoo              | Site PI                |
| ~~~~    | ~~~~                                | Dr Alison Tree               | Clinical/Surgical      |
| ~~~~    | ~~~~                                | Dr Liam Welsh                | Clinical/Surgical      |
| ~~~~    | ~~~~                                | Dr Nicholas Van As           | Clinical/Surgical      |
| ~~~~    | ~~~~                                | Miss Holly Hogan             | Point of contact (1st) |
| ~~~~    | ~~~~                                | Miss Jennyfa Ali             | Point of contact (1st) |
| ~~~~    | ~~~~                                | Mr Bernard Siu               | Point of contact (1st) |
| ~~~~    | ~~~~                                | Mrs Sijy Pillai              | Point of contact (1st) |
| ~~~~    | ~~~~                                | Ms Giulia Carlino            | Point of contact (1st) |
| ~~~~    | ~~~~                                | Mr Joseph Montebello         | Point of contact (2nd) |
| ~~~~    | ~~~~                                | Miss Vijitha Vijayakumar     | Research Nurse         |
| ~~~~    | ~~~~                                | Mr Trevor Bott               | Research Nurse         |
| ~~~~    | ~~~~                                | Mrs Debra Townsend-Thorn     | Research Nurse         |
| ~~~~    | ~~~~                                | Mrs Ruth Stafferton          | Research Nurse         |
| ~~~~    | ~~~~                                | Miss Hanna Bryant            | Trial Coordinator      |
| ~~~~    | ~~~~                                | Mr Emmanuel Brown            | Trial Coordinator      |
| ~~~~    | ~~~~                                | Ms Cordelia Grant            | Trial Coordinator      |
| ~~~~    | ~~~~                                | Ms Laillah-Crystal Banda     | Trial Coordinator      |
| ~~~~    | ~~~~                                | Miss Maryam Ali              | Administrator          |
| ~~~~    | ~~~~                                | Mr Chintan Mojindra          | Administrator          |
| ~~~~    | ~~~~                                | Mrs Sarah Storrs             | Administrator          |
| ~~~~    | ~~~~                                | Mr Matthew Olabanji          | Other                  |
| ~~~~    | ~~~~                                | Ms Jennifer Morrison         | Other                  |
| UK      | London: Royal Marsden Hosp (Sutton) | Dr Chris Parker              | Site PI                |
| ~~~~    | ~~~~                                | Dr Ramachandran Venkitaraman | Clinical/Surgical      |

## INVESTIGATORS AND COLLABORATORS: SITE STAFF

Staff on site delegation logs

| Country | Site                                  | Names                       | Role                   |
|---------|---------------------------------------|-----------------------------|------------------------|
| ~~~     | ~~~                                   | Dr Robert Huddart           | Clinical/Surgical      |
| ~~~     | ~~~                                   | Prof Alan Horwich           | Clinical/Surgical      |
| ~~~     | ~~~                                   | Prof David Dearnaley        | Clinical/Surgical      |
| ~~~     | ~~~                                   | Mrs Annie Gao               | Point of contact (1st) |
| ~~~     | ~~~                                   | Ms Louise Murphy            | Point of contact (1st) |
| ~~~     | ~~~                                   | Mr John Marshall            | Trial Coordinator      |
| ~~~     | ~~~                                   | Ms Val Lewington            | Trial Coordinator      |
| UK      | London: St Bartholomews Hosp (London) | Dr Paula Wells              | Site PI                |
| ~~~     | ~~~                                   | Dr Alexandre Kaliski        | Clinical/Surgical      |
| ~~~     | ~~~                                   | Dr Karen Tipples            | Clinical/Surgical      |
| ~~~     | ~~~                                   | Mrs Resmi Jayachandran      | Point of contact (1st) |
| ~~~     | ~~~                                   | Ms Olivia Bolton            | Point of contact (1st) |
| ~~~     | ~~~                                   | Mr Paul Hillman             | Research Nurse         |
| ~~~     | ~~~                                   | Ms Janet Kiff               | Research Nurse         |
| ~~~     | ~~~                                   | Mr Fatjon Dekaj             | Trial Coordinator      |
| ~~~     | ~~~                                   | Mr Alastair Nicholson       | Data Manager           |
| ~~~     | ~~~                                   | Mr Jude Nixon               | Data Manager           |
| ~~~     | ~~~                                   | Ms Janet Oladimeji          | Data Manager           |
| ~~~     | ~~~                                   | Ms Nanette Bech-Nielsen     | Research Asst          |
| ~~~     | ~~~                                   | Mr Oscar Riches             | Radiographer           |
| ~~~     | ~~~                                   | Mrs Samantha Chetiyawardana | Radiographer           |
| ~~~     | ~~~                                   | Dr Dan Smith                | Other                  |
| ~~~     | ~~~                                   | Dr John Conibear            | Other                  |
| ~~~     | ~~~                                   | Dr Kirsty Beaton            | Other                  |
| UK      | London: St Georges Hosp (London)      | Mr Rami Issa                | Site PI                |
| ~~~     | ~~~                                   | Dr Vincent Khoo             | Clinical/Surgical      |
| ~~~     | ~~~                                   | Mr Chris Anderson           | Clinical/Surgical      |
| ~~~     | ~~~                                   | Mr Matthew Perry            | Clinical/Surgical      |
| ~~~     | ~~~                                   | Miss Claire Gilmartin       | Point of contact (1st) |
| ~~~     | ~~~                                   | Miss Serena Dover           | Point of contact (1st) |
| ~~~     | ~~~                                   | Mr Juel Tuazon              | Point of contact (1st) |
| ~~~     | ~~~                                   | Ms Sophie Golden            | Point of contact (1st) |
| ~~~     | ~~~                                   | Miss Jesusa Toledo          | Research Nurse         |
| ~~~     | ~~~                                   | Mr Robert Varro             | Research Nurse         |

## INVESTIGATORS AND COLLABORATORS: SITE STAFF

Staff on site delegation logs

| Country | Site                            | Names                    | Role                   |
|---------|---------------------------------|--------------------------|------------------------|
| ~~~     | ~~~                             | Ms Helen Tighe           | Research Nurse         |
| ~~~     | ~~~                             | Ms Jane Gregg            | Research Nurse         |
| ~~~     | ~~~                             | Mr Mark Quarrell         | Trial Coordinator      |
| ~~~     | ~~~                             | Ms Chandni Patel         | Trial Coordinator      |
| ~~~     | ~~~                             | Ms Deirdre Daly          | Data Manager           |
| ~~~     | ~~~                             | Miss Titilayo Oni        | Administrator          |
| ~~~     | ~~~                             | Ms Debbie Rolfe          | Pharmacist             |
| UK      | London: St Marys Hosp (London)  | Dr Simon Stewart         | Site PI                |
| ~~~     | ~~~                             | Mr Mark Caballes         | Point of contact (1st) |
| ~~~     | ~~~                             | Mrs Manisha Joshi        | Point of contact (1st) |
| ~~~     | ~~~                             | Ms Emily Russell         | Point of contact (1st) |
| ~~~     | ~~~                             | Ms Stephanie Ivie        | Point of contact (1st) |
| ~~~     | ~~~                             | Ms Anne-Maree Thoi       | Research Nurse         |
| ~~~     | ~~~                             | Mr Farhan Naim           | Trial Coordinator      |
| ~~~     | ~~~                             | Ms Byiravey Pathmanathan | Trial Coordinator      |
| ~~~     | ~~~                             | Ms Gillian Hornzee       | Trial Coordinator      |
| ~~~     | ~~~                             | Ms Joy Liau              | Trial Coordinator      |
| ~~~     | ~~~                             | Mr Vikram Bohra          | Data Manager           |
| ~~~     | ~~~                             | Ms Laura Custins         | Data Manager           |
| ~~~     | ~~~                             | Miss Anna Westrop        | Administrator          |
| ~~~     | ~~~                             | Mr Anup Patel            | Administrator          |
| ~~~     | ~~~                             | Ms Anna Tippins          | MDT coordinator        |
| ~~~     | ~~~                             | Ms Sophia Magwaro        | Radiographer           |
| UK      | London: University College Hosp | Dr Heather Payne         | Site PI                |
| ~~~     | ~~~                             | Dr Reena Davda           | Site PI                |
| ~~~     | ~~~                             | Dr Ajay Aggarwal         | Clinical/Surgical      |
| ~~~     | ~~~                             | Dr Anita Mitra           | Clinical/Surgical      |
| ~~~     | ~~~                             | Dr David Woolf           | Clinical/Surgical      |
| ~~~     | ~~~                             | Dr Jonathan Teh          | Clinical/Surgical      |
| ~~~     | ~~~                             | Dr Julia Hall            | Clinical/Surgical      |
| ~~~     | ~~~                             | Dr Rachel Khong          | Clinical/Surgical      |
| ~~~     | ~~~                             | Mr Thomas Amoaten        | Point of contact (1st) |
| ~~~     | ~~~                             | Ms Nicole Bonsu          | Point of contact (1st) |
| ~~~     | ~~~                             | Ms Patricia Danaswamy    | Point of contact (1st) |

## INVESTIGATORS AND COLLABORATORS: SITE STAFF

Staff on site delegation logs

| Country | Site                                             | Names                   | Role                   |
|---------|--------------------------------------------------|-------------------------|------------------------|
| ~~~     | ~~~                                              | Ms Suzy Lowi            | Point of contact (1st) |
| ~~~     | ~~~                                              | Ms Didem Agdiran        | Point of contact (2nd) |
| ~~~     | ~~~                                              | Ms Helene Zilkha        | Point of contact (2nd) |
| ~~~     | ~~~                                              | Ms Samantha Whinn       | Point of contact (2nd) |
| ~~~     | ~~~                                              | Ms Annelies Gillesen    | Research Nurse         |
| ~~~     | ~~~                                              | Mr Richard Merrick      | Trial Coordinator      |
| ~~~     | ~~~                                              | Mrs Roshni Goel         | Data Manager           |
| ~~~     | ~~~                                              | Ms Natasha Aslam        | Data Manager           |
| ~~~     | ~~~                                              | Ms Zainab Butt          | Radiographer           |
| UK      | London: Whipps Cross University Hosp             | Mr James Green          | Site PI                |
| ~~~     | ~~~                                              | Dr David Woolf          | Clinical/Surgical      |
| ~~~     | ~~~                                              | Dr Paula Wells          | Clinical/Surgical      |
| ~~~     | ~~~                                              | Mr John Hines           | Clinical/Surgical      |
| ~~~     | ~~~                                              | Mr John Peters          | Clinical/Surgical      |
| ~~~     | ~~~                                              | Mr Simon Holden         | Clinical/Surgical      |
| ~~~     | ~~~                                              | Mr Timothy Philp        | Clinical/Surgical      |
| ~~~     | ~~~                                              | Mrs Resmi Jayachandran  | Point of contact (1st) |
| ~~~     | ~~~                                              | Ms Olivia Bolton        | Point of contact (1st) |
| ~~~     | ~~~                                              | Miss Memory Kazingizi   | Research Nurse         |
| ~~~     | ~~~                                              | Mr John O'Neill         | Research Nurse         |
| ~~~     | ~~~                                              | Mr Paul Hillman         | Research Nurse         |
| ~~~     | ~~~                                              | Mr Thompson Olaoni      | Research Nurse         |
| ~~~     | ~~~                                              | Ms Emma Foster          | Research Nurse         |
| ~~~     | ~~~                                              | Ms Linda Dawson-Athey   | Research Nurse         |
| ~~~     | ~~~                                              | Ms Patricia Danaswamy   | Research Nurse         |
| ~~~     | ~~~                                              | Ms Sadaf Zaidi          | Trial Coordinator      |
| ~~~     | ~~~                                              | Ms Nanette Bech-Nielsen | Research Asst          |
| ~~~     | ~~~                                              | Mr Andrew Gillian       | Pharmacist             |
| UK      | Macclesfield: Macclesfield District General Hosp | Mr Richard Brough       | Site PI                |
| ~~~     | ~~~                                              | Mr Adebajji Adeyoju     | Clinical/Surgical      |
| ~~~     | ~~~                                              | Mr Gerald Collins       | Clinical/Surgical      |
| ~~~     | ~~~                                              | Mr Stephen CW Brown     | Clinical/Surgical      |
| ~~~     | ~~~                                              | Mr Waheed Zafar         | Clinical/Surgical      |
| ~~~     | ~~~                                              | Ms Magda Kujawa         | Clinical/Surgical      |



## INVESTIGATORS AND COLLABORATORS: SITE STAFF

Staff on site delegation logs

| Country | Site                      | Names                   | Role                   |
|---------|---------------------------|-------------------------|------------------------|
| ~~~     | ~~~                       | Mrs Pippa Hill          | Point of contact (1st) |
| ~~~     | ~~~                       | Mrs Victoria Adinkra    | Research Nurse         |
| ~~~     | ~~~                       | Ms Barbara Townley      | Research Nurse         |
| ~~~     | ~~~                       | Mr Iain Woodhouse       | Trial Coordinator      |
| ~~~     | ~~~                       | Ms Marilyn McCurrie     | Administrator          |
| ~~~     | ~~~                       | Ms Lisa Hardstaff       | Other                  |
| UK      | Maidstone: Maidstone Hosp | Dr Henry Taylor         | Site PI                |
| ~~~     | ~~~                       | Dr Carys Thomas         | Clinical/Surgical      |
| ~~~     | ~~~                       | Dr Christos Mikropoulos | Clinical/Surgical      |
| ~~~     | ~~~                       | Mr John Donohue         | Clinical/Surgical      |
| ~~~     | ~~~                       | Dr Kathryn Lees         | Clinical/Surgical      |
| ~~~     | ~~~                       | Dr Patryk Brulinski     | Clinical/Surgical      |
| ~~~     | ~~~                       | Dr Sharon Beesley       | Clinical/Surgical      |
| ~~~     | ~~~                       | Mrs Alison Davison      | Point of contact (1st) |
| ~~~     | ~~~                       | Ms Verity Roberts       | Point of contact (1st) |
| ~~~     | ~~~                       | Mrs Ann Phillips        | Research Nurse         |
| ~~~     | ~~~                       | Mrs Jane Murray         | Research Nurse         |
| ~~~     | ~~~                       | Ms Barbara Mercier      | Research Nurse         |
| ~~~     | ~~~                       | Ms Carmel Jope          | Research Nurse         |
| ~~~     | ~~~                       | Ms Lisa Tribe           | Research Nurse         |
| ~~~     | ~~~                       | Ms Sarah Martins        | Research Nurse         |
| ~~~     | ~~~                       | Ms Vivienne Breen       | Research Nurse         |
| ~~~     | ~~~                       | Ms Yvonne Lines         | Trial Coordinator      |
| ~~~     | ~~~                       | Mr Gavin Fossey         | Administrator          |
| ~~~     | ~~~                       | Ms Clare Calvert        | Administrator          |
| ~~~     | ~~~                       | Mr Ian Pamphlett        | Pharmacist             |
| ~~~     | ~~~                       | Dr Pauline Wood         | Radiographer           |
| ~~~     | ~~~                       | Miss Katy Taylor        | Radiographer           |
| ~~~     | ~~~                       | Mr Innocent Neshiri     | Radiographer           |
| ~~~     | ~~~                       | Mrs Heather Dias        | Radiographer           |
| ~~~     | ~~~                       | Ms Jodie Hotine         | Radiographer           |
| ~~~     | ~~~                       | Ms Pavnish Rai          | Radiographer           |
| ~~~     | ~~~                       | Ms Sarah Rezkallah      | Radiographer           |
| ~~~     | ~~~                       | Mr Ifan Jones           | Other                  |

## INVESTIGATORS AND COLLABORATORS: SITE STAFF

Staff on site delegation logs

| Country | Site                      | Names                 | Role                   |
|---------|---------------------------|-----------------------|------------------------|
| ~       | ~                         | Ms Su Burrage         | Other                  |
| UK      | Manchester: Christie Hosp | Dr John Logue         | Site PI                |
| ~       | ~                         | Dr Ananya Choudhury   | Clinical/Surgical      |
| ~       | ~                         | Dr Jacqueline Livsey  | Clinical/Surgical      |
| ~       | ~                         | Dr James Wylie        | Clinical/Surgical      |
| ~       | ~                         | Dr Richard Cowan      | Clinical/Surgical      |
| ~       | ~                         | Dr Ruth Conroy        | Clinical/Surgical      |
| ~       | ~                         | Dr Tony Elliott       | Clinical/Surgical      |
| ~       | ~                         | Miss Amber Hart       | Point of contact (1st) |
| ~       | ~                         | Ms Roonak Nazari      | Point of contact (1st) |
| ~       | ~                         | Ms Sarah-Ellen Smith  | Point of contact (1st) |
| ~       | ~                         | Ms Lucy Worsley       | Point of contact (2nd) |
| ~       | ~                         | Miss Kate O'Connor    | Research Nurse         |
| ~       | ~                         | Mr Damian McCaul      | Research Nurse         |
| ~       | ~                         | Ms Carol Newbery      | Research Nurse         |
| ~       | ~                         | Ms Catherine Redshaw  | Research Nurse         |
| ~       | ~                         | Sister Jackie O'Dwyer | Research Nurse         |
| ~       | ~                         | Sister Viv Thomas     | Research Nurse         |
| ~       | ~                         | Miss Holly White      | Trial Coordinator      |
| ~       | ~                         | Miss Laura Flanagan   | Trial Coordinator      |
| ~       | ~                         | Miss Maria Petsa      | Trial Coordinator      |
| ~       | ~                         | Miss Willemijn Spoor  | Trial Coordinator      |
| ~       | ~                         | Mr Adrian Fallaize    | Trial Coordinator      |
| ~       | ~                         | Mr Ekugbe Onoge       | Trial Coordinator      |
| ~       | ~                         | Mr Ian Duncan         | Trial Coordinator      |
| ~       | ~                         | Ms Joanne Oliver      | Trial Coordinator      |
| ~       | ~                         | Ms Viviana Carpio     | Trial Coordinator      |
| ~       | ~                         | Miss Sarah Green      | Data Manager           |
| ~       | ~                         | Mr Ian Bottomley      | Data Manager           |
| ~       | ~                         | Miss Kim Fair         | Administrator          |
| ~       | ~                         | Mrs Sue Davison       | Administrator          |
| ~       | ~                         | Mr Jonathan Buchan    | MDT coordinator        |
| ~       | ~                         | Ms Catherine Harris   | Other                  |
| ~       | ~                         | Ms Cathryn Jones      | Other                  |

## INVESTIGATORS AND COLLABORATORS: SITE STAFF

Staff on site delegation logs

| Country | Site                                      | Names                    | Role                   |
|---------|-------------------------------------------|--------------------------|------------------------|
| UK      | Manchester: Withington Hosp               | Mr Vijay Sangar          | Site PI                |
| ~~~     | ~~~                                       | Dr James Wylie           | Clinical/Surgical      |
| ~~~     | ~~~                                       | Mr Vijay Ramani          | Clinical/Surgical      |
| ~~~     | ~~~                                       | Ms Heena Mistry          | Point of contact (1st) |
| ~~~     | ~~~                                       | Ms Linda Bailey          | Point of contact (1st) |
| ~~~     | ~~~                                       | Ms Lindsay Piper         | Point of contact (1st) |
| ~~~     | ~~~                                       | Ms Molly Bennett         | Point of contact (1st) |
| ~~~     | ~~~                                       | Ms Kathryn Slevin        | Point of contact (2nd) |
| ~~~     | ~~~                                       | Miss Anna Gipson         | Research Nurse         |
| ~~~     | ~~~                                       | Miss Fiona McCarth       | Research Nurse         |
| ~~~     | ~~~                                       | Mrs Helen Haydock        | Research Nurse         |
| ~~~     | ~~~                                       | Ms Fiona McCartin        | Research Nurse         |
| ~~~     | ~~~                                       | Ms Kathryn Fellows       | Research Nurse         |
| ~~~     | ~~~                                       | Ms Sarah Liptrott        | Research Nurse         |
| ~~~     | ~~~                                       | Ms Thobekile Mthethwa    | Research Nurse         |
| ~~~     | ~~~                                       | Ms Annie Duffy           | Trial Coordinator      |
| ~~~     | ~~~                                       | Ms Sarah Sahin           | Trial Coordinator      |
| ~~~     | ~~~                                       | Ms Rebecca Corless       | Data Manager           |
| ~~~     | ~~~                                       | Ms Lillian Partington    | Pharmacist             |
| ~~~     | ~~~                                       | Dr Jonathan Tuck         | Other                  |
| ~~~     | ~~~                                       | Dr WF Knox               | Other                  |
| UK      | Middlesbrough: James Cook University Hosp | Dr Clive Peedell         | Site PI                |
| ~~~     | ~~~                                       | Dr David Wilson          | Clinical/Surgical      |
| ~~~     | ~~~                                       | Dr Devadasan Shakespeare | Clinical/Surgical      |
| ~~~     | ~~~                                       | Dr Hans Van der Voet     | Clinical/Surgical      |
| ~~~     | ~~~                                       | Dr John Hardman          | Clinical/Surgical      |
| ~~~     | ~~~                                       | Dr Julia McBride         | Clinical/Surgical      |
| ~~~     | ~~~                                       | Mr David Chadwick        | Clinical/Surgical      |
| ~~~     | ~~~                                       | Ms Rita Mohan            | Point of contact (1st) |
| ~~~     | ~~~                                       | Mr Keith Harland         | Point of contact (2nd) |
| ~~~     | ~~~                                       | Mrs Alison Barnes        | Research Nurse         |
| ~~~     | ~~~                                       | Mrs Carol Long           | Research Nurse         |
| ~~~     | ~~~                                       | Ms Lorraine Atkinson     | Research Nurse         |
| ~~~     | ~~~                                       | Sister Patricia McClurey | Research Nurse         |

## INVESTIGATORS AND COLLABORATORS: SITE STAFF

Staff on site delegation logs

| Country | Site                      | Names                     | Role                   |
|---------|---------------------------|---------------------------|------------------------|
| ~~~     | ~~~                       | Mrs Alison Chilvers       | Trial Coordinator      |
| ~~~     | ~~~                       | Ms Alison Chilvers        | Trial Coordinator      |
| ~~~     | ~~~                       | Ms Sarah McAuliffe        | Trial Coordinator      |
| ~~~     | ~~~                       | Ms Lynne Naylor           | Administrator          |
| ~~~     | ~~~                       | Ms Sarah Barnbrooke       | MDT coordinator        |
| ~~~     | ~~~                       | Mrs Paula Robson          | Radiographer           |
| ~~~     | ~~~                       | Ms Emma Thompson          | Radiographer           |
| ~~~     | ~~~                       | Ms Caroline Brownless     | Other                  |
| UK      | Newcastle: Freeman Hosp   | Dr Ian Pedley             | Site PI                |
| ~~~     | ~~~                       | Dr John Frew              | Clinical/Surgical      |
| ~~~     | ~~~                       | Dr Rhona McMenemin        | Clinical/Surgical      |
| ~~~     | ~~~                       | Dr Trevor Roberts         | Clinical/Surgical      |
| ~~~     | ~~~                       | Miss Janine Tate          | Point of contact (1st) |
| ~~~     | ~~~                       | Mr Jonathan Stoddart      | Point of contact (1st) |
| ~~~     | ~~~                       | Ms Jayashree Walker       | Trial Coordinator      |
| ~~~     | ~~~                       | Miss Danielle Riseborough | Data Manager           |
| ~~~     | ~~~                       | Miss Katy Lambert         | Data Manager           |
| ~~~     | ~~~                       | Miss Emma Stockley        | Radiographer           |
| ~~~     | ~~~                       | Mr Chris Barron           | Radiographer           |
| ~~~     | ~~~                       | Ms Bridget Workman        | Other                  |
| UK      | Newport: Royal Gwent Hosp | Mr Jim Wilson             | Site PI                |
| ~~~     | ~~~                       | Mr Adam Carter            | Clinical/Surgical      |
| ~~~     | ~~~                       | Mr Adam Cox               | Clinical/Surgical      |
| ~~~     | ~~~                       | Mr Syhed Rahman           | Clinical/Surgical      |
| ~~~     | ~~~                       | Miss Maxine Nash          | Point of contact (1st) |
| ~~~     | ~~~                       | Mr Simon Hodge            | Research Nurse         |
| ~~~     | ~~~                       | Mrs Debra Barnett         | Research Nurse         |
| ~~~     | ~~~                       | Ms Julie Simpson          | Research Nurse         |
| ~~~     | ~~~                       | Ms Karen Wild             | Research Nurse         |
| ~~~     | ~~~                       | Ms Rachel Williams        | Research Nurse         |
| ~~~     | ~~~                       | Ms S Kearney              | Research Nurse         |
| ~~~     | ~~~                       | Ms Alison Davey           | Trial Coordinator      |
| ~~~     | ~~~                       | Ms Janet Marty            | Trial Coordinator      |
| ~~~     | ~~~                       | Ms Kirstin Davies         | Trial Coordinator      |

## INVESTIGATORS AND COLLABORATORS: SITE STAFF

Staff on site delegation logs

| Country | Site                                       | Names                        | Role                   |
|---------|--------------------------------------------|------------------------------|------------------------|
| ~~~     | ~~~                                        | Ms Lisa Gilby                | Trial Coordinator      |
| ~~~     | ~~~                                        | Mrs Jayne Richards           | Data Manager           |
| ~~~     | ~~~                                        | Mrs Paula Webb               | Data Manager           |
| ~~~     | ~~~                                        | Ms Helene Lavender           | Data Manager           |
| ~~~     | ~~~                                        | Ms Elaine Wall               | Administrator          |
| UK      | Northampton: Northampton General Hosp      | Dr Jenny Branagan            | Site PI                |
| ~~~     | ~~~                                        | Dr Christine Elwell          | Clinical/Surgical      |
| ~~~     | ~~~                                        | Dr Dorai Ramanathan          | Clinical/Surgical      |
| ~~~     | ~~~                                        | Dr Philip Camilleri          | Clinical/Surgical      |
| ~~~     | ~~~                                        | Mrs Ruby Goyena              | Point of contact (1st) |
| ~~~     | ~~~                                        | Ms Maxine Foo                | Point of contact (1st) |
| ~~~     | ~~~                                        | Ms Rachel Tighe (nee Bussey) | Point of contact (1st) |
| ~~~     | ~~~                                        | Jane O'Callaghan             | Point of contact (2nd) |
| ~~~     | ~~~                                        | Ms Andrea Jones              | Point of contact (2nd) |
| ~~~     | ~~~                                        | Mrs Katherine McGrath        | Research Nurse         |
| ~~~     | ~~~                                        | Ms Gillian Dell              | Research Nurse         |
| ~~~     | ~~~                                        | Ms Bronwen Thominson         | Administrator          |
| ~~~     | ~~~                                        | Mrs Elizabeth Tee            | Other                  |
| ~~~     | ~~~                                        | Ms Hazel McBain              | Other                  |
| UK      | Norwich: Norfolk & Norwich University Hosp | Dr Rob Wade                  | Site PI                |
| ~~~     | ~~~                                        | Dr Jenny Nobes               | Clinical/Surgical      |
| ~~~     | ~~~                                        | Dr Joe Ostrowski             | Clinical/Surgical      |
| ~~~     | ~~~                                        | Mr Guarav Kapur              | Clinical/Surgical      |
| ~~~     | ~~~                                        | Mrs Adele Cooper             | Clinical/Surgical      |
| ~~~     | ~~~                                        | Mrs Suzanne Walker           | Clinical/Surgical      |
| ~~~     | ~~~                                        | Ms Karen Heasley             | Clinical/Surgical      |
| ~~~     | ~~~                                        | Ms Cheryl Websdale           | Point of contact (1st) |
| ~~~     | ~~~                                        | Ms Sara Callam               | Point of contact (1st) |
| ~~~     | ~~~                                        | Ms Sarah Turner              | Point of contact (1st) |
| ~~~     | ~~~                                        | Ms Denise Archer             | Point of contact (2nd) |
| ~~~     | ~~~                                        | Dr Jane Beety                | Trial Coordinator      |
| ~~~     | ~~~                                        | Mrs Joanna White             | Trial Coordinator      |
| ~~~     | ~~~                                        | Mrs Sharon Walton            | Trial Coordinator      |
| ~~~     | ~~~                                        | Ms Bridget Shobrook          | Trial Coordinator      |

## INVESTIGATORS AND COLLABORATORS: SITE STAFF

Staff on site delegation logs

| Country | Site                                                 | Names                   | Role                   |
|---------|------------------------------------------------------|-------------------------|------------------------|
| ~~~     | ~~~                                                  | Ms Helen Darby          | Trial Coordinator      |
| ~~~     | ~~~                                                  | Mr Mark Bloomfield      | Data Manager           |
| ~~~     | ~~~                                                  | Mr Richard Birch        | Data Manager           |
| ~~~     | ~~~                                                  | Mrs Katrien Oosterom    | Data Manager           |
| ~~~     | ~~~                                                  | Miss Clare London       | Pharmacist             |
| ~~~     | ~~~                                                  | Miss Gail Healey        | Pharmacist             |
| UK      | Nottingham: Nottingham University Hosps, City Campus | Dr Georgina Walker      | Site PI                |
| ~~~     | ~~~                                                  | Dr Ian Sayers           | Clinical/Surgical      |
| ~~~     | ~~~                                                  | Dr Jamie Mills          | Clinical/Surgical      |
| ~~~     | ~~~                                                  | Dr Santhanam Sundar     | Clinical/Surgical      |
| ~~~     | ~~~                                                  | Miss Leanne Alder       | Point of contact (1st) |
| ~~~     | ~~~                                                  | Ms Hazel Marley         | Point of contact (1st) |
| ~~~     | ~~~                                                  | Ms Cody Jevons          | Point of contact (2nd) |
| ~~~     | ~~~                                                  | Ms Rachael Chivers      | Point of contact (2nd) |
| ~~~     | ~~~                                                  | Miss Lucy Howard        | Research Nurse         |
| ~~~     | ~~~                                                  | Ms Hanna Purves         | Research Nurse         |
| ~~~     | ~~~                                                  | Mrs Catherine Wood      | Administrator          |
| ~~~     | ~~~                                                  | Mrs Carol Gooch         | Radiographer           |
| ~~~     | ~~~                                                  | Miss Camille Hutchinson | Other                  |
| ~~~     | ~~~                                                  | Mr Daniel Kumar         | Other                  |
| ~~~     | ~~~                                                  | Mr Jacob Szolin-Jones   | Other                  |
| UK      | Oldham: Royal Oldham Hosp                            | Dr Jacqueline Livsey    | Site PI                |
| ~~~     | ~~~                                                  | Dr Ruth Conroy          | Site PI                |
| ~~~     | ~~~                                                  | Dr Ananya Choudhury     | Clinical/Surgical      |
| ~~~     | ~~~                                                  | Ms Lyndsay Scarratt     | Point of contact (1st) |
| ~~~     | ~~~                                                  | Ms Dawn Johnstone       | Point of contact (2nd) |
| ~~~     | ~~~                                                  | Ms Joanne Johnson       | Point of contact (2nd) |
| ~~~     | ~~~                                                  | Mr Richard Jones        | Research Nurse         |
| ~~~     | ~~~                                                  | Ms Wendy Cook           | Research Nurse         |
| ~~~     | ~~~                                                  | Mrs Leena Mistry        | Trial Coordinator      |
| ~~~     | ~~~                                                  | Ms Lisa Gill            | Trial Coordinator      |
| UK      | Oxford: Churchill Hosp                               | Dr Philip Camilleri     | Site PI                |
| ~~~     | ~~~                                                  | Dr Ahmad Sabbagh        | Clinical/Surgical      |
| ~~~     | ~~~                                                  | Dr Ami Sabharwal        | Clinical/Surgical      |

## INVESTIGATORS AND COLLABORATORS: SITE STAFF

Staff on site delegation logs

| Country | Site | Names                     | Role                   |
|---------|------|---------------------------|------------------------|
| ~~~     | ~~~  | Dr Anne Kiltie            | Clinical/Surgical      |
| ~~~     | ~~~  | Dr David J Cole           | Clinical/Surgical      |
| ~~~     | ~~~  | Dr Gagan Bhatnagar        | Clinical/Surgical      |
| ~~~     | ~~~  | Dr Gerard Andrade         | Clinical/Surgical      |
| ~~~     | ~~~  | Dr Hiba Al-Chamali        | Clinical/Surgical      |
| ~~~     | ~~~  | Dr Katherine Hyde         | Clinical/Surgical      |
| ~~~     | ~~~  | Dr Michael Skwarski       | Clinical/Surgical      |
| ~~~     | ~~~  | Dr Niki Panakis           | Clinical/Surgical      |
| ~~~     | ~~~  | Dr Raj Jampana            | Clinical/Surgical      |
| ~~~     | ~~~  | Dr Rob Owens              | Clinical/Surgical      |
| ~~~     | ~~~  | Dr Robert Stuart          | Clinical/Surgical      |
| ~~~     | ~~~  | Mr Daniel Ajzensztein     | Clinical/Surgical      |
| ~~~     | ~~~  | Mr Simon Brewster         | Clinical/Surgical      |
| ~~~     | ~~~  | Miss Patrycja Jastrzebska | Point of contact (1st) |
| ~~~     | ~~~  | Miss Weronika Rabsztyn    | Point of contact (1st) |
| ~~~     | ~~~  | Mrs Kerrie Doyle          | Point of contact (1st) |
| ~~~     | ~~~  | Ms Sandra Mukkath         | Point of contact (1st) |
| ~~~     | ~~~  | Ms Sylwia Bekulart        | Point of contact (1st) |
| ~~~     | ~~~  | Mrs Ann Murphy            | Research Nurse         |
| ~~~     | ~~~  | Mrs Anne Butterfield      | Research Nurse         |
| ~~~     | ~~~  | Mrs Jo Wilson             | Research Nurse         |
| ~~~     | ~~~  | Mrs Kerrie Marston        | Research Nurse         |
| ~~~     | ~~~  | Ms Jane Boutflower        | Research Nurse         |
| ~~~     | ~~~  | Ms Phillippa Kyffin       | Research Nurse         |
| ~~~     | ~~~  | Ms Sarah Lawrey           | Research Nurse         |
| ~~~     | ~~~  | Ms Sarah Markus           | Research Nurse         |
| ~~~     | ~~~  | Mr Dave Barber            | Trial Coordinator      |
| ~~~     | ~~~  | Ms Abimbola Aiku          | Trial Coordinator      |
| ~~~     | ~~~  | Mr Matthew Mooney         | Data Manager           |
| ~~~     | ~~~  | Mr Naveen Sankighatta     | Data Manager           |
| ~~~     | ~~~  | Mr Tim Coutts             | Data Manager           |
| ~~~     | ~~~  | Ms Trish Green            | Data Manager           |
| ~~~     | ~~~  | Ms Nicole Langridge       | Administrator          |
| ~~~     | ~~~  | Miss Grace Samkange       | Radiographer           |

## INVESTIGATORS AND COLLABORATORS: SITE STAFF

Staff on site delegation logs

| Country | Site                                     | Names                        | Role                   |
|---------|------------------------------------------|------------------------------|------------------------|
| ~~~     | ~~~                                      | Miss Lisa Durrant            | Radiographer           |
| ~~~     | ~~~                                      | Mrs Sarah Ruane              | Radiographer           |
| ~~~     | ~~~                                      | Ms Weronika Carroll          | Radiographer           |
| ~~~     | ~~~                                      | Ms Sandie Wellman            | Other                  |
| UK      | Peterborough: Peterborough City Hosp     | Dr Abigail Hollingdale       | Site PI                |
| ~~~     | ~~~                                      | Ms Kerrie Cavanagh           | Point of contact (1st) |
| UK      | Peterborough: Peterborough District Hosp | Dr Debbie Gregory            | Site PI                |
| ~~~     | ~~~                                      | Dr Charlotte Ingle           | Clinical/Surgical      |
| ~~~     | ~~~                                      | Dr Richard Benson            | Clinical/Surgical      |
| ~~~     | ~~~                                      | Ms Elisa Barter              | Clinical/Surgical      |
| ~~~     | ~~~                                      | Ms Paula-Joanne Rooney       | Research Nurse         |
| ~~~     | ~~~                                      | Ms Susan Allen               | Trial Coordinator      |
| ~~~     | ~~~                                      | Miss Steph Lawrence          | Administrator          |
| UK      | Plymouth: Derriford Hosp                 | Mr Henry Sells               | Site PI                |
| ~~~     | ~~~                                      | Dr Esther McLarty            | Clinical/Surgical      |
| ~~~     | ~~~                                      | Dr Salvatore Natale          | Clinical/Surgical      |
| ~~~     | ~~~                                      | Dr Sarah Pascoe              | Clinical/Surgical      |
| ~~~     | ~~~                                      | Mr John Christopher Hammonds | Clinical/Surgical      |
| ~~~     | ~~~                                      | Mr Paul McInerney            | Clinical/Surgical      |
| ~~~     | ~~~                                      | Mr Keith Purcell             | Point of contact (1st) |
| ~~~     | ~~~                                      | Ms Lyn Cogley                | Point of contact (1st) |
| ~~~     | ~~~                                      | Miss Emma Bishop             | Point of contact (2nd) |
| ~~~     | ~~~                                      | Ms Sharah Tyner              | Point of contact (2nd) |
| ~~~     | ~~~                                      | Ms Victoria yates            | Point of contact (2nd) |
| ~~~     | ~~~                                      | Ms Maria Brennan             | Research Nurse         |
| UK      | Poole: Poole Hosp                        | Dr Joe Davies                | Site PI                |
| ~~~     | ~~~                                      | Dr Perric Crellin            | Clinical/Surgical      |
| ~~~     | ~~~                                      | Dr Sathish Harinarayanan     | Clinical/Surgical      |
| ~~~     | ~~~                                      | Dr Sue Brock                 | Clinical/Surgical      |
| ~~~     | ~~~                                      | Mrs Louise Heckford          | Point of contact (1st) |
| ~~~     | ~~~                                      | Ms Sophie Rix                | Point of contact (1st) |
| ~~~     | ~~~                                      | Mr Neal Beamish              | Point of contact (2nd) |
| ~~~     | ~~~                                      | Mr Roger Wheelwright         | Research Nurse         |
| ~~~     | ~~~                                      | Ms Amanda Iskender           | Research Nurse         |



## INVESTIGATORS AND COLLABORATORS: SITE STAFF

Staff on site delegation logs

| Country | Site                             | Names                    | Role                   |
|---------|----------------------------------|--------------------------|------------------------|
| ~~~     | ~~~                              | Ms Elizabeth Clarke      | Research Nurse         |
| ~~~     | ~~~                              | Ms Hilary Blaney         | Research Nurse         |
| ~~~     | ~~~                              | Ms Sandy Pressdee        | Research Nurse         |
| ~~~     | ~~~                              | Ms Seonaid Wright        | Research Nurse         |
| ~~~     | ~~~                              | Mrs Josie Goodsell       | Trial Coordinator      |
| ~~~     | ~~~                              | Miss Elizabeth Woodward  | Data Manager           |
| ~~~     | ~~~                              | Miss Nichola Downs       | Data Manager           |
| ~~~     | ~~~                              | Ms Sally Gillespie       | Data Manager           |
| ~~~     | ~~~                              | Ms Sara Orford           | Data Manager           |
| ~~~     | ~~~                              | Ms Teresa Coffin         | Administrator          |
| ~~~     | ~~~                              | Miss Felicity Clapp      | Radiographer           |
| UK      | Portsmouth: Queen Alexandra Hosp | Dr Maja Uherek           | Site PI                |
| ~~~     | ~~~                              | Dr Yoodhvir Nagar        | Site PI                |
| ~~~     | ~~~                              | Dr Azarel Virgo          | Clinical/Surgical      |
| ~~~     | ~~~                              | Dr Ghassan Khoury        | Clinical/Surgical      |
| ~~~     | ~~~                              | Dr Kudingila Madhava     | Clinical/Surgical      |
| ~~~     | ~~~                              | Ms Mila Roca             | Point of contact (1st) |
| ~~~     | ~~~                              | Mrs Jennifer Hale        | Point of contact (2nd) |
| ~~~     | ~~~                              | Mrs Tracey Dobson        | Point of contact (2nd) |
| ~~~     | ~~~                              | Ms Anna Stephenson       | Point of contact (2nd) |
| ~~~     | ~~~                              | Mrs Angie Harris-Burland | Research Nurse         |
| ~~~     | ~~~                              | Mrs Wendy Stacey         | Research Nurse         |
| ~~~     | ~~~                              | Ms Lorna Meadows         | Administrator          |
| ~~~     | ~~~                              | Ms Catrin Watkinson      | Pharmacist             |
| ~~~     | ~~~                              | Ms Kathy Blight          | Pharmacist             |
| UK      | Preston: Royal Preston Hosp      | Dr Alison Birtle         | Site PI                |
| ~~~     | ~~~                              | Dr Marcus Wise           | Clinical/Surgical      |
| ~~~     | ~~~                              | Dr Omi Parikh            | Clinical/Surgical      |
| ~~~     | ~~~                              | Ms Catherine Walmsley    | Point of contact (1st) |
| ~~~     | ~~~                              | Ms Zainab Chauhan        | Point of contact (2nd) |
| ~~~     | ~~~                              | Miss Rose Ellard         | Research Nurse         |
| ~~~     | ~~~                              | Mr Billy Hefferon        | Research Nurse         |
| ~~~     | ~~~                              | Mrs Claire Searle        | Research Nurse         |
| ~~~     | ~~~                              | Mrs Sandra Curtis        | Research Nurse         |

## INVESTIGATORS AND COLLABORATORS: SITE STAFF

Staff on site delegation logs

| Country | Site                            | Names                           | Role                   |
|---------|---------------------------------|---------------------------------|------------------------|
| ~~~     | ~~~                             | Ms Stephanie Cornthwaite        | Research Nurse         |
| ~~~     | ~~~                             | Mr Nathan Fish                  | Data Manager           |
| ~~~     | ~~~                             | Ms Helen Spickett               | Data Manager           |
| UK      | Reading: Royal Berkshire Hosp   | Dr Paul Rogers                  | Site PI                |
| ~~~     | ~~~                             | Dr Richard B Brown              | Clinical/Surgical      |
| ~~~     | ~~~                             | Mr Stephen Parr                 | Point of contact (1st) |
| ~~~     | ~~~                             | Ms Emma Vowell                  | Point of contact (1st) |
| ~~~     | ~~~                             | Ms Jane Atkinson                | Point of contact (1st) |
| ~~~     | ~~~                             | Mrs Christina Lewis             | Point of contact (2nd) |
| ~~~     | ~~~                             | Mrs Wioletta Kowalczyk-Williams | Research Nurse         |
| ~~~     | ~~~                             | Ms Allison Hunt                 | Research Nurse         |
| ~~~     | ~~~                             | Ms Helen Purdon                 | Research Nurse         |
| ~~~     | ~~~                             | Ms Kristy Coomber               | Research Nurse         |
| ~~~     | ~~~                             | Ms Debbie Cartwright            | Trial Coordinator      |
| UK      | Redditch: Alexandra Hosp        | Dr Lisa Capaldi                 | Site PI                |
| ~~~     | ~~~                             | Dr Joanna Hamilton              | Clinical/Surgical      |
| ~~~     | ~~~                             | Mrs Alison Harrison             | Point of contact (1st) |
| ~~~     | ~~~                             | Mrs Hayley Hodson               | Point of contact (2nd) |
| ~~~     | ~~~                             | Mrs Sarah Moss                  | Research Nurse         |
| ~~~     | ~~~                             | Mrs Wendy Featherstone          | Research Nurse         |
| ~~~     | ~~~                             | Ms Andrea Isaew                 | Research Nurse         |
| ~~~     | ~~~                             | Ms Jeanette Knapp               | Research Nurse         |
| ~~~     | ~~~                             | Ms Margaret Hindle              | MDT coordinator        |
| UK      | Romford: Queen's Hosp (Romford) | Dr Maria Martinou               | Site PI                |
| ~~~     | ~~~                             | Dr Stephanie Gibbs              | Site PI                |
| ~~~     | ~~~                             | Prof Saad Tahir                 | Site PI                |
| ~~~     | ~~~                             | Dr Ramachandran Subramaniam     | Clinical/Surgical      |
| ~~~     | ~~~                             | Mr Anand Kelkar                 | Clinical/Surgical      |
| ~~~     | ~~~                             | Mr Mohammad Tanvir Vandal       | Clinical/Surgical      |
| ~~~     | ~~~                             | Mr Sandeep Gujral               | Clinical/Surgical      |
| ~~~     | ~~~                             | Mr Neale O'Brien                | Point of contact (1st) |
| ~~~     | ~~~                             | Thi Vu                          | Point of contact (1st) |
| ~~~     | ~~~                             | Mr Revanth Jannapureddy         | Point of contact (2nd) |
| ~~~     | ~~~                             | Ms Tina Mills-Baldock           | Research Nurse         |

## INVESTIGATORS AND COLLABORATORS: SITE STAFF

Staff on site delegation logs

| Country | Site                               | Names                           | Role                   |
|---------|------------------------------------|---------------------------------|------------------------|
| UK      | Salford: Salford Royal Hosp        | Mr Alastair Nicholson           | Data Manager           |
|         |                                    | Prof Noel Clarke                | Site PI                |
|         |                                    | Dr Anna Tran                    | Clinical/Surgical      |
|         |                                    | Dr Richard Cowan                | Clinical/Surgical      |
|         |                                    | Mr Chris Betts                  | Clinical/Surgical      |
|         |                                    | Mr David Shackley               | Clinical/Surgical      |
|         |                                    | Mr Kieran O'Flynn               | Clinical/Surgical      |
|         |                                    | Mr Maurice Lau                  | Clinical/Surgical      |
|         |                                    | Mr Tony Elliott                 | Clinical/Surgical      |
|         |                                    | Miss Kay Goulden                | Point of contact (1st) |
|         |                                    | Mrs Siny George                 | Point of contact (1st) |
|         |                                    | Ms Cellins Vinod                | Point of contact (1st) |
|         |                                    | Ms Catherine Redshaw            | Research Nurse         |
|         |                                    | Ms Helen Farrell                | Research Nurse         |
|         |                                    | Ms Rachael Allen                | Research Nurse         |
|         |                                    | Ms Soney Dharmaprasad           | Research Nurse         |
|         |                                    | Sister Jill Youd                | Research Nurse         |
|         |                                    | Sister Melanie Taylor           | Research Nurse         |
|         |                                    | Sister Sarah Kirk               | Research Nurse         |
|         |                                    | Mr Garry Stevenson              | Trial Coordinator      |
|         |                                    | Mrs Chloe-Anne Thompson         | Data Manager           |
|         |                                    | Mrs Christine Farnworth         | Data Manager           |
|         |                                    | Miss Danielle Platt             | Administrator          |
|         |                                    | Mr Oliver Wadsworth             | Administrator          |
|         |                                    | Ms Karen Richardson             | Administrator          |
|         |                                    | Ms Leah Harter                  | Administrator          |
|         |                                    | Ms Malan Kaushal                | Administrator          |
|         |                                    | Mrs Amanda Cordwell             | MDT coordinator        |
|         |                                    | Ms Amanda Bowmer                | MDT coordinator        |
|         |                                    | Mrs Claire Duncan (nee Keatley) | Pharmacist             |
|         |                                    | Ms Anne Marie Lydon             | Other                  |
| UK      | Salisbury: Salisbury District Hosp | Dr Adityanarayan Bhatnagar      | Site PI                |
|         |                                    | Mr Allister Campbell            | Clinical/Surgical      |
|         |                                    | Mr Gregor McIntosh              | Clinical/Surgical      |

## INVESTIGATORS AND COLLABORATORS: SITE STAFF

Staff on site delegation logs

| Country | Site                                | Names                           | Role                   |
|---------|-------------------------------------|---------------------------------|------------------------|
| ~~~     | ~~~                                 | Mr Mohammed El-Saghir           | Clinical/Surgical      |
| ~~~     | ~~~                                 | Mr Peter Guy                    | Clinical/Surgical      |
| ~~~     | ~~~                                 | Mrs Lehentha Mattocks           | Point of contact (1st) |
| ~~~     | ~~~                                 | Mrs Catherine Reed              | Research Nurse         |
| ~~~     | ~~~                                 | Mrs Sarah Bunn                  | Research Nurse         |
| ~~~     | ~~~                                 | Ms Julie Attlee                 | Research Nurse         |
| ~~~     | ~~~                                 | Ms Ruth Fennelly                | Trial Coordinator      |
| ~~~     | ~~~                                 | Mrs Sophia Strong-Sheldrake     | Administrator          |
| ~~~     | ~~~                                 | Ms Julie Gwilt                  | Administrator          |
| ~~~     | ~~~                                 | Ms Gemma Tedd                   | MDT coordinator        |
| ~~~     | ~~~                                 | Mrs Brenda Murphy               | Pharmacist             |
| UK      | Scunthorpe: Scunthorpe General Hosp | Dr Sanjay Dixit                 | Site PI                |
| ~~~     | ~~~                                 | Mrs Sue Spencer                 | Point of contact (1st) |
| ~~~     | ~~~                                 | Ms Kathleen Dent                | Point of contact (1st) |
| ~~~     | ~~~                                 | Ms Sandra Pearson               | Point of contact (1st) |
| ~~~     | ~~~                                 | Ms Dorota Potoczna              | Point of contact (2nd) |
| ~~~     | ~~~                                 | Mrs Karen Martin                | Research Nurse         |
| ~~~     | ~~~                                 | Ms Jo Towse                     | Data Manager           |
| ~~~     | ~~~                                 | Ms Nikita Whotton               | Data Manager           |
| ~~~     | ~~~                                 | Ms Marion Hood                  | Administrator          |
| UK      | Sheffield: Weston Park Hosp         | Dr Catherine Ferguson           | Site PI                |
| ~~~     | ~~~                                 | Dr Jessica Tay                  | Site PI                |
| ~~~     | ~~~                                 | Dr Jackie Martin                | Clinical/Surgical      |
| ~~~     | ~~~                                 | Dr Katie Bowen                  | Clinical/Surgical      |
| ~~~     | ~~~                                 | Dr Peter Kirkbride              | Clinical/Surgical      |
| ~~~     | ~~~                                 | Ms Rachael Clarke               | Point of contact (1st) |
| ~~~     | ~~~                                 | Sister Kim Wood                 | Research Nurse         |
| ~~~     | ~~~                                 | Mrs Kate Gibbins                | Trial Coordinator      |
| ~~~     | ~~~                                 | Miss Alexandra Firth            | Data Manager           |
| ~~~     | ~~~                                 | Mr John Martindale              | Data Manager           |
| ~~~     | ~~~                                 | Mrs Janine Smedley (nee McCabe) | Data Manager           |
| ~~~     | ~~~                                 | Ms Su Clark                     | Data Manager           |
| ~~~     | ~~~                                 | Ms Catherine Spalton            | Research Asst          |
| ~~~     | ~~~                                 | Ms Suzanne Smith                | Administrator          |

## INVESTIGATORS AND COLLABORATORS: SITE STAFF

Staff on site delegation logs

| Country | Site                              | Names                      | Role                   |
|---------|-----------------------------------|----------------------------|------------------------|
| UK      | Shrewsbury: Royal Shrewsbury Hosp | Dr Narayanan Srihari       | Site PI                |
| ~~~     | ~~~                               | Mr Ravi Prashant           | Clinical/Surgical      |
| ~~~     | ~~~                               | Mr Sanal Jose              | Point of contact (1st) |
| ~~~     | ~~~                               | Ms Emma Bates              | Point of contact (1st) |
| ~~~     | ~~~                               | Ms Indukala Chennattukungu | Point of contact (1st) |
| ~~~     | ~~~                               | Ms Joanna Clancy           | Point of contact (1st) |
| ~~~     | ~~~                               | Mrs Hayley Hughes          | Research Nurse         |
| ~~~     | ~~~                               | Mrs Sunita Kurian-Downer   | Research Nurse         |
| ~~~     | ~~~                               | Ms Elena Michael           | Research Nurse         |
| ~~~     | ~~~                               | Ms Karen Nicholas          | Research Nurse         |
| ~~~     | ~~~                               | Ms Sally Potts             | Research Nurse         |
| ~~~     | ~~~                               | Ms Vanessa Cross           | Research Nurse         |
| ~~~     | ~~~                               | Sister Helen Moore         | Research Nurse         |
| ~~~     | ~~~                               | Mrs Marion Adams           | Trial Coordinator      |
| ~~~     | ~~~                               | Miss Suzanne Pope          | Data Manager           |
| ~~~     | ~~~                               | Mrs Sandra Smith           | Data Manager           |
| ~~~     | ~~~                               | Mrs Harpreet Singh         | Administrator          |
| ~~~     | ~~~                               | Mrs Emma Weaver            | Radiographer           |
| UK      | Slough: Wexham Park Hosp          | Dr Nicola Dallas           | Site PI                |
| ~~~     | ~~~                               | Dr Helen O'Donnell         | Clinical/Surgical      |
| ~~~     | ~~~                               | Dr M Laniado               | Clinical/Surgical      |
| ~~~     | ~~~                               | Dr Richard B Brown         | Clinical/Surgical      |
| ~~~     | ~~~                               | Dr Shahid Sharif           | Clinical/Surgical      |
| ~~~     | ~~~                               | Mr Omer Karim              | Clinical/Surgical      |
| ~~~     | ~~~                               | Miss Nicky Barnes          | Point of contact (1st) |
| ~~~     | ~~~                               | Miss Nicole Kader          | Point of contact (2nd) |
| ~~~     | ~~~                               | Ms Ana Sierra Pala         | Point of contact (2nd) |
| ~~~     | ~~~                               | Mrs Victoria Robinson      | Research Nurse         |
| ~~~     | ~~~                               | Ms Alison Sears            | Research Nurse         |
| ~~~     | ~~~                               | Ms Jayne Litchfield        | Research Nurse         |
| ~~~     | ~~~                               | Sister Ann Jackson         | Research Nurse         |
| ~~~     | ~~~                               | Sister Catherine Smith     | Research Nurse         |
| ~~~     | ~~~                               | Mrs Julie-Ann Sinclair     | Data Manager           |
| ~~~     | ~~~                               | Ms Sana Mahmood            | Pharmacist             |

## INVESTIGATORS AND COLLABORATORS: SITE STAFF

Staff on site delegation logs

| Country | Site                                  | Names                      | Role                   |
|---------|---------------------------------------|----------------------------|------------------------|
| ~~~     | ~~~                                   | Dr Ali Abbas               | Other                  |
| UK      | Somerset: Musgrove Park Hosp          | Dr Emma Gray               | Site PI                |
| ~~~     | ~~~                                   | Dr Faith McMeekin          | Clinical/Surgical      |
| ~~~     | ~~~                                   | Dr John Boardman           | Clinical/Surgical      |
| ~~~     | ~~~                                   | Dr John Graham             | Clinical/Surgical      |
| ~~~     | ~~~                                   | Dr Joseph Jelski           | Clinical/Surgical      |
| ~~~     | ~~~                                   | Dr Manivannan Periasamy    | Clinical/Surgical      |
| ~~~     | ~~~                                   | Dr Manjusha Keni           | Clinical/Surgical      |
| ~~~     | ~~~                                   | Dr Mary Tighe              | Clinical/Surgical      |
| ~~~     | ~~~                                   | Dr Mohini Varughese        | Clinical/Surgical      |
| ~~~     | ~~~                                   | Mr Surayne Segaran         | Clinical/Surgical      |
| ~~~     | ~~~                                   | Ms Jeanette Bowes-Cavanagh | Clinical/Surgical      |
| ~~~     | ~~~                                   | Miss Rebecca Brown         | Point of contact (1st) |
| ~~~     | ~~~                                   | Mrs Sue Mahoney            | Point of contact (1st) |
| ~~~     | ~~~                                   | Ms Alison Whitcher         | Point of contact (1st) |
| ~~~     | ~~~                                   | Ms Sara Green              | Point of contact (1st) |
| ~~~     | ~~~                                   | Mr Tamlyn Russell          | Point of contact (2nd) |
| ~~~     | ~~~                                   | Mrs Maria Zietz            | Point of contact (2nd) |
| ~~~     | ~~~                                   | Ms Jayne Foot              | Point of contact (2nd) |
| ~~~     | ~~~                                   | Ms Alison Chedham          | Research Nurse         |
| ~~~     | ~~~                                   | Ms Angela Locke            | Research Nurse         |
| ~~~     | ~~~                                   | Ms Martha Wrigley          | Research Nurse         |
| ~~~     | ~~~                                   | Mrs Michelle Farrar        | Trial Coordinator      |
| ~~~     | ~~~                                   | Ms Flora Darch             | Trial Coordinator      |
| ~~~     | ~~~                                   | Ms Christine Webster       | Data Manager           |
| ~~~     | ~~~                                   | Mrs Sarah Wiggins          | Administrator          |
| ~~~     | ~~~                                   | Ms Jan Ashcroft            | Administrator          |
| ~~~     | ~~~                                   | Ms Rebecca Wallbutton      | Administrator          |
| ~~~     | ~~~                                   | Mr Simon Goldsworthy       | Radiographer           |
| ~~~     | ~~~                                   | Miss Odunayo Kalejaiye     | Other                  |
| ~~~     | ~~~                                   | Ms Elizabeth Ruzala        | Other                  |
| UK      | Southampton: Southampton General Hosp | Dr Catherine Heath         | Site PI                |
| ~~~     | ~~~                                   | Dr Alec Paschalis          | Clinical/Surgical      |
| ~~~     | ~~~                                   | Dr Mark Noble              | Clinical/Surgical      |

## INVESTIGATORS AND COLLABORATORS: SITE STAFF

Staff on site delegation logs

| Country | Site                               | Names                         | Role                   |
|---------|------------------------------------|-------------------------------|------------------------|
| ~~~     | ~~~                                | Dr Victoria McFarlane         | Clinical/Surgical      |
| ~~~     | ~~~                                | Ms Anna Stephenson            | Point of contact (1st) |
| ~~~     | ~~~                                | Ms Annelise Haskell           | Point of contact (1st) |
| ~~~     | ~~~                                | Ms Fabiola Morales-Azofra     | Point of contact (1st) |
| ~~~     | ~~~                                | Ms Lucy Galloway              | Point of contact (1st) |
| ~~~     | ~~~                                | Ms Malavika Ganabady          | Point of contact (1st) |
| ~~~     | ~~~                                | Ms Carina Mundy               | Research Nurse         |
| ~~~     | ~~~                                | Ms Kirsty Cumming             | Research Nurse         |
| ~~~     | ~~~                                | Ms Naomi James                | Research Nurse         |
| ~~~     | ~~~                                | Mrs Julie Kennedy             | Trial Coordinator      |
| ~~~     | ~~~                                | Mrs Julie Patrick             | Trial Coordinator      |
| ~~~     | ~~~                                | Mrs Susan Morton              | Trial Coordinator      |
| ~~~     | ~~~                                | Ms Shauna Wakefield           | Trial Coordinator      |
| ~~~     | ~~~                                | Ms Julie Abab                 | Administrator          |
| ~~~     | ~~~                                | Ms Julie Gwilt                | Administrator          |
| ~~~     | ~~~                                | Ms Leanne Reader              | Administrator          |
| ~~~     | ~~~                                | Mrs Lisa Taylor               | MDT coordinator        |
| UK      | Southend: Southend University Hosp | Dr David Tsang                | Site PI                |
| ~~~     | ~~~                                | Dr Abby Cyriac                | Clinical/Surgical      |
| ~~~     | ~~~                                | Dr Imtiaz Ahmed               | Clinical/Surgical      |
| ~~~     | ~~~                                | Dr Jan Prejbisz               | Clinical/Surgical      |
| ~~~     | ~~~                                | Dr Olivia Chan                | Clinical/Surgical      |
| ~~~     | ~~~                                | Mrs Tracey Davies             | Point of contact (1st) |
| ~~~     | ~~~                                | Ms Sheila Reece               | Research Nurse         |
| ~~~     | ~~~                                | Ms Sue Bowman                 | Trial Coordinator      |
| ~~~     | ~~~                                | Ms Heather Shires             | Administrator          |
| ~~~     | ~~~                                | Ms Katrina Maitland           | Other                  |
| UK      | Stockport: Stepping Hill Hosp      | Dr John Logue                 | Site PI                |
| ~~~     | ~~~                                | Mr WA Brough                  | Site PI                |
| ~~~     | ~~~                                | Mr Gerald Collins             | Clinical/Surgical      |
| ~~~     | ~~~                                | Mr Richard Brough             | Clinical/Surgical      |
| ~~~     | ~~~                                | Mr Elliott Wiss               | Point of contact (1st) |
| ~~~     | ~~~                                | Ms Sarah Connolly nee McKenna | Point of contact (1st) |
| ~~~     | ~~~                                | Ms Sarah Smallwood            | Point of contact (1st) |

## INVESTIGATORS AND COLLABORATORS: SITE STAFF

Staff on site delegation logs

| Country | Site                                 | Names                    | Role                   |
|---------|--------------------------------------|--------------------------|------------------------|
| ~~~     | ~~~                                  | Ms Sheila Hodgkinson     | Point of contact (1st) |
| ~~~     | ~~~                                  | Mrs Tricia Coughlan      | Point of contact (2nd) |
| ~~~     | ~~~                                  | Ms Emma Goodwin          | Point of contact (2nd) |
| ~~~     | ~~~                                  | Mrs Helen Haydock        | Research Nurse         |
| ~~~     | ~~~                                  | Ms Christina Gilmour     | Research Nurse         |
| ~~~     | ~~~                                  | Ms Eleanor Anscombe      | Research Nurse         |
| ~~~     | ~~~                                  | Ms Sam Corcoran          | Research Nurse         |
| ~~~     | ~~~                                  | Ms Jill Taylor           | Data Manager           |
| ~~~     | ~~~                                  | Ms Tracie Cocks          | Data Manager           |
| ~~~     | ~~~                                  | Ms Pat Clitheroe         | Administrator          |
| ~~~     | ~~~                                  | Mrs Carol Rotherham      | MDT coordinator        |
| ~~~     | ~~~                                  | Mr John Kilmartin        | Pharmacist             |
| ~~~     | ~~~                                  | Ms Lucy Orrell           | Pharmacist             |
| ~~~     | ~~~                                  | Ms Susan Graham          | Pharmacist             |
| ~~~     | ~~~                                  | Dr Umi Hatimy            | Other                  |
| UK      | Stoke: Royal Stoke University Hosp   | Dr Salil Vengalil        | Site PI                |
| ~~~     | ~~~                                  | Dr Fawzi Adab            | Clinical/Surgical      |
| ~~~     | ~~~                                  | Dr Kathirvelu Dhinakaran | Clinical/Surgical      |
| ~~~     | ~~~                                  | Dr Rajanee Bhana         | Clinical/Surgical      |
| ~~~     | ~~~                                  | Mrs Angela Peake         | Point of contact (1st) |
| ~~~     | ~~~                                  | Ms Georgia Thomasson     | Point of contact (1st) |
| ~~~     | ~~~                                  | Miss Elizabeth Sellars   | Point of contact (2nd) |
| ~~~     | ~~~                                  | Ms Katrina Parkinson     | Point of contact (2nd) |
| ~~~     | ~~~                                  | Mrs Angela Ward          | Research Nurse         |
| ~~~     | ~~~                                  | Mrs Marion Evans         | Research Nurse         |
| ~~~     | ~~~                                  | Ms Alison Myatt          | Research Nurse         |
| ~~~     | ~~~                                  | Ms Jenny Walton          | Research Nurse         |
| ~~~     | ~~~                                  | Ms Julie Storer          | Data Manager           |
| ~~~     | ~~~                                  | Ms Rowena Smith          | Radiographer           |
| UK      | Sutton-in-Ashfield: King's Mill Hosp | Dr Eliot Chadwick        | Site PI                |
| ~~~     | ~~~                                  | Dr Alastair McCabe       | Clinical/Surgical      |
| ~~~     | ~~~                                  | Dr Daniel Saunders       | Clinical/Surgical      |
| ~~~     | ~~~                                  | Dr Georgina Walker       | Clinical/Surgical      |
| ~~~     | ~~~                                  | Dr Jun Lim               | Clinical/Surgical      |



## INVESTIGATORS AND COLLABORATORS: SITE STAFF

Staff on site delegation logs

| Country | Site                        | Names                         | Role                   |
|---------|-----------------------------|-------------------------------|------------------------|
| ~~~     | ~~~                         | Dr Santhanam Sundar           | Clinical/Surgical      |
| ~~~     | ~~~                         | Mr Dominic Nash               | Point of contact (1st) |
| ~~~     | ~~~                         | Ms Susan Smith                | Point of contact (1st) |
| ~~~     | ~~~                         | Miss Jamie-Rae Burgoyne       | Data Manager           |
| ~~~     | ~~~                         | Mr Steve Haigh                | Pharmacist             |
| ~~~     | ~~~                         | Mrs Samantha Boam             | Pharmacist             |
| ~~~     | ~~~                         | Ms Keri Hollis                | Pharmacist             |
| ~~~     | ~~~                         | Ms Lyndsey Munson             | Pharmacist             |
| ~~~     | ~~~                         | Ms Lynne Wade                 | Pharmacist             |
| ~~~     | ~~~                         | Dr Shafiq Gill                | Other                  |
| UK      | Swansea: Singleton Hosp     | Dr Mau-Don Phan               | Site PI                |
| ~~~     | ~~~                         | Dr Delia Pudney               | Clinical/Surgical      |
| ~~~     | ~~~                         | Miss Ellen Tait               | Point of contact (1st) |
| ~~~     | ~~~                         | Miss Nicola Lemon             | Point of contact (1st) |
| ~~~     | ~~~                         | Ms Bethan Williams            | Point of contact (1st) |
| ~~~     | ~~~                         | Ms Emily Harris (n. Marchant) | Point of contact (1st) |
| ~~~     | ~~~                         | Ms Elizabeth Evans            | Point of contact (2nd) |
| ~~~     | ~~~                         | Ms Maria Johnstone            | Point of contact (2nd) |
| ~~~     | ~~~                         | Mrs Alex Franklin             | Research Nurse         |
| ~~~     | ~~~                         | Ms Alison Stretch             | Research Nurse         |
| ~~~     | ~~~                         | Mr Lewis Jones                | Trial Coordinator      |
| ~~~     | ~~~                         | Ms Rachael Spence             | Radiographer           |
| UK      | Swindon: Great Western Hosp | Dr Omar Khan                  | Site PI                |
| ~~~     | ~~~                         | Dr David J Cole               | Clinical/Surgical      |
| ~~~     | ~~~                         | Dr Shiroma De Silva-Minor     | Clinical/Surgical      |
| ~~~     | ~~~                         | Ms Suzannah Pegler            | Point of contact (1st) |
| ~~~     | ~~~                         | Ms Abbie Poole                | Point of contact (2nd) |
| ~~~     | ~~~                         | Mr Vivian Zinyemba            | Research Nurse         |
| ~~~     | ~~~                         | Mrs Debbie Palmer             | Research Nurse         |
| ~~~     | ~~~                         | Ms Ania Jones                 | Research Nurse         |
| ~~~     | ~~~                         | Ms Cerila Parajes             | Research Nurse         |
| ~~~     | ~~~                         | Ms Ellen Starling             | Research Nurse         |
| ~~~     | ~~~                         | Sister Helen Winter           | Research Nurse         |
| ~~~     | ~~~                         | Sister Jan Dodge              | Research Nurse         |

## INVESTIGATORS AND COLLABORATORS: SITE STAFF

Staff on site delegation logs

| Country | Site                                 | Names                      | Role                   |
|---------|--------------------------------------|----------------------------|------------------------|
| ~~~     | ~~~                                  | Sister Tracey Sargent      | Research Nurse         |
| ~~~     | ~~~                                  | Mrs Sarah Grayland         | Research Asst          |
| ~~~     | ~~~                                  | Mr Tim Owen                | Administrator          |
| ~~~     | ~~~                                  | Mrs Rebecca Belcher        | Administrator          |
| ~~~     | ~~~                                  | Ms Becky Taylor            | Administrator          |
| UK      | Torbay: Torbay District General Hosp | Dr Anna Lydon              | Site PI                |
| ~~~     | ~~~                                  | Dr Erica Watts             | Clinical/Surgical      |
| ~~~     | ~~~                                  | Dr Jorg Michels            | Clinical/Surgical      |
| ~~~     | ~~~                                  | Dr Rajaguru Srinivasan     | Clinical/Surgical      |
| ~~~     | ~~~                                  | Mr Jon Buckley             | Point of contact (1st) |
| ~~~     | ~~~                                  | Mrs Michele Allison        | Point of contact (1st) |
| ~~~     | ~~~                                  | Mrs Shelley Chamberlain    | Point of contact (1st) |
| ~~~     | ~~~                                  | Miss Linda Welsh           | Point of contact (2nd) |
| ~~~     | ~~~                                  | Mrs Donna Cuffe            | Research Nurse         |
| ~~~     | ~~~                                  | Mrs Elaine Vandecandalaere | Research Nurse         |
| ~~~     | ~~~                                  | Ms Catherine Brookman      | Research Nurse         |
| ~~~     | ~~~                                  | Ms Helen Greedus           | Research Nurse         |
| ~~~     | ~~~                                  | Ms Ingrid Koehler          | Research Nurse         |
| ~~~     | ~~~                                  | Ms Lorraine Thornton       | Research Nurse         |
| ~~~     | ~~~                                  | Miss Claire Fairfax        | Administrator          |
| ~~~     | ~~~                                  | Miss Hannah Griffin        | Administrator          |
| ~~~     | ~~~                                  | Miss Stacey Davies         | Administrator          |
| ~~~     | ~~~                                  | Ms Julia Pym               | Administrator          |
| ~~~     | ~~~                                  | Mr Martyn Blundell         | Pharmacist             |
| ~~~     | ~~~                                  | Dr Fiona Roberts           | Other                  |
| UK      | Wakefield: Pinderfields Hosp         | Dr Juliette Anderson       | Site PI                |
| ~~~     | ~~~                                  | Dr Ann Henry               | Clinical/Surgical      |
| ~~~     | ~~~                                  | Dr Catherine Coyle         | Clinical/Surgical      |
| ~~~     | ~~~                                  | Dr Chris Fosker            | Clinical/Surgical      |
| ~~~     | ~~~                                  | Dr Nathalie Casanova       | Clinical/Surgical      |
| ~~~     | ~~~                                  | Dr Peter Dickinson         | Clinical/Surgical      |
| ~~~     | ~~~                                  | Dr Sree Rodda              | Clinical/Surgical      |
| ~~~     | ~~~                                  | Mr Philip Weston           | Clinical/Surgical      |
| ~~~     | ~~~                                  | Mr Rohit Chahal            | Clinical/Surgical      |

## INVESTIGATORS AND COLLABORATORS: SITE STAFF

Staff on site delegation logs

| Country | Site                                      | Names                          | Role                   |
|---------|-------------------------------------------|--------------------------------|------------------------|
| ~~~     | ~~~                                       | Mr Subramanian Kanaga Sundaram | Clinical/Surgical      |
| ~~~     | ~~~                                       | Mr Subramanian Kanaga-Sundaram | Clinical/Surgical      |
| ~~~     | ~~~                                       | Mr Jim Anderson                | Point of contact (1st) |
| ~~~     | ~~~                                       | Mr Stephen Littler             | Point of contact (1st) |
| ~~~     | ~~~                                       | Mr Jonathan Slack              | Point of contact (2nd) |
| ~~~     | ~~~                                       | Ms Beverley Taylor             | Point of contact (2nd) |
| ~~~     | ~~~                                       | Ms Barbara Burlace             | Research Nurse         |
| ~~~     | ~~~                                       | Ms Janine Heeley               | Administrator          |
| ~~~     | ~~~                                       | Ms Julie Ball                  | Administrator          |
| ~~~     | ~~~                                       | Mr Richard Bowers              | Pharmacist             |
| ~~~     | ~~~                                       | Ms Louise Benton               | Pharmacist             |
| UK      | Warwick: Warwick Hosp                     | Dr Andrew Chan                 | Site PI                |
| ~~~     | ~~~                                       | Dr Andrew Stockdale            | Clinical/Surgical      |
| ~~~     | ~~~                                       | Mr Ashley Johnson-Rollings     | Point of contact (1st) |
| ~~~     | ~~~                                       | Mrs Tina Gamble                | Point of contact (1st) |
| ~~~     | ~~~                                       | Ms Donna Walsh                 | Point of contact (1st) |
| ~~~     | ~~~                                       | Ms Jo Williams                 | Point of contact (2nd) |
| ~~~     | ~~~                                       | Mrs Elaine Simmons             | Research Nurse         |
| ~~~     | ~~~                                       | Mrs Helen Millage              | Research Nurse         |
| ~~~     | ~~~                                       | Ms Eilish O'Neill              | Research Nurse         |
| ~~~     | ~~~                                       | Ms Kerrie Webb                 | Research Nurse         |
| ~~~     | ~~~                                       | Ms Lyn Hartwell                | Research Nurse         |
| ~~~     | ~~~                                       | Mrs Theresa Griffiths          | Data Manager           |
| ~~~     | ~~~                                       | Mrs Julia Jones                | Pharmacist             |
| ~~~     | ~~~                                       | Ms Judith Chettle              | Pharmacist             |
| UK      | Weston-Super-Mare: Weston General Hosp    | Dr Serena Hilman               | Site PI                |
| ~~~     | ~~~                                       | Dr Symeon Eleftheriadis        | Clinical/Surgical      |
| ~~~     | ~~~                                       | Dr Tom Wells                   | Clinical/Surgical      |
| ~~~     | ~~~                                       | Mr Harvey Dymond               | Point of contact (1st) |
| ~~~     | ~~~                                       | Mr Hugh Lloyd-Jones            | Research Nurse         |
| ~~~     | ~~~                                       | Mr John Anderson               | Administrator          |
| UK      | Wirral: Clatterbridge Centre for Oncology | Dr Isabel Syndikus             | Site PI                |
| ~~~     | ~~~                                       | Dr Helen Innes                 | Clinical/Surgical      |
| ~~~     | ~~~                                       | Dr John Littler                | Clinical/Surgical      |

## INVESTIGATORS AND COLLABORATORS: SITE STAFF

Staff on site delegation logs

| Country | Site                          | Names                 | Role                   |
|---------|-------------------------------|-----------------------|------------------------|
| ~~~     | ~~~                           | Dr Shaun Tolan        | Clinical/Surgical      |
| ~~~     | ~~~                           | Mrs Kathryn Hughes    | Point of contact (1st) |
| ~~~     | ~~~                           | Mrs Sarah Bennett     | Point of contact (1st) |
| ~~~     | ~~~                           | Mrs Sharon Dunn       | Point of contact (1st) |
| ~~~     | ~~~                           | Ms Alison Kelly       | Point of contact (1st) |
| ~~~     | ~~~                           | Ms Nikki Miller       | Point of contact (1st) |
| ~~~     | ~~~                           | Mr Matthew Stott      | Research Nurse         |
| ~~~     | ~~~                           | Mrs Diane Fildes      | Research Nurse         |
| ~~~     | ~~~                           | Ms Alison Hassall     | Research Nurse         |
| ~~~     | ~~~                           | Ms Gaynor Herbert     | Research Nurse         |
| ~~~     | ~~~                           | Mr Laurie Lomax       | Trial Coordinator      |
| ~~~     | ~~~                           | Mr Chris Nutman       | Data Manager           |
| ~~~     | ~~~                           | Ms Alison Weston      | Data Manager           |
| UK      | Wolverhampton: New Cross Hosp | Dr Ian Sayers         | Site PI                |
| ~~~     | ~~~                           | Dr Ali Samanci        | Clinical/Surgical      |
| ~~~     | ~~~                           | Dr Mark Churn         | Clinical/Surgical      |
| ~~~     | ~~~                           | Dr Pek Keng-Koh       | Clinical/Surgical      |
| ~~~     | ~~~                           | Mr Peter Cooke        | Clinical/Surgical      |
| ~~~     | ~~~                           | Arizoo Mohseeni       | Point of contact (1st) |
| ~~~     | ~~~                           | Miss Renita Pawaroo   | Point of contact (1st) |
| ~~~     | ~~~                           | Mr David Homer        | Point of contact (1st) |
| ~~~     | ~~~                           | Mr Jason Rogers       | Point of contact (2nd) |
| ~~~     | ~~~                           | Mrs Christine Kirk    | Research Nurse         |
| ~~~     | ~~~                           | Mrs Claire Lomas      | Research Nurse         |
| ~~~     | ~~~                           | Mrs Emma Sharman      | Research Nurse         |
| ~~~     | ~~~                           | Mrs Ivanna Baker      | Research Nurse         |
| ~~~     | ~~~                           | Ms Anna Grant         | Trial Coordinator      |
| ~~~     | ~~~                           | Mrs Hazel Spencer     | Data Manager           |
| ~~~     | ~~~                           | Ms Debbie Spruce      | Data Manager           |
| ~~~     | ~~~                           | Mrs Liz Radford       | Research Asst          |
| ~~~     | ~~~                           | Ms Hannah Worthington | Research Asst          |
| ~~~     | ~~~                           | Ms Marian McCormick   | Research Asst          |
| ~~~     | ~~~                           | Ms Jenny Chatfield    | Administrator          |
| ~~~     | ~~~                           | Ms Vanda Carter       | Other                  |

## INVESTIGATORS AND COLLABORATORS: SITE STAFF

Staff on site delegation logs

| Country | Site                                 | Names                      | Role                   |
|---------|--------------------------------------|----------------------------|------------------------|
| UK      | Worcester: Worcestershire Royal Hosp | Dr Lisa Capaldi            | Site PI                |
| ~~~     | ~~~                                  | Dr Jo Bowen                | Clinical/Surgical      |
| ~~~     | ~~~                                  | Dr Kamalnayan Gupta        | Clinical/Surgical      |
| ~~~     | ~~~                                  | Mr Jacob Taylor            | Point of contact (1st) |
| ~~~     | ~~~                                  | Mrs Amanda Holdsworth      | Point of contact (1st) |
| ~~~     | ~~~                                  | Ms Jayne Tyler             | Point of contact (1st) |
| ~~~     | ~~~                                  | Mrs Dagmara Bak            | Point of contact (2nd) |
| ~~~     | ~~~                                  | Mrs Hayley Hodson          | Point of contact (2nd) |
| ~~~     | ~~~                                  | Mrs Kristy Cleary          | Research Nurse         |
| ~~~     | ~~~                                  | Mrs Helen Tranter          | Trial Coordinator      |
| ~~~     | ~~~                                  | Ms Janet Forkes            | Trial Coordinator      |
| ~~~     | ~~~                                  | Mrs Patricia Rimell        | Data Manager           |
| ~~~     | ~~~                                  | Ms Sue Davies              | Data Manager           |
| ~~~     | ~~~                                  | Miss Kate Ledger           | Research Asst          |
| ~~~     | ~~~                                  | Ms Jennifer Healey-Mariano | Research Asst          |
| ~~~     | ~~~                                  | Mr Hugh Morrow             | Pharmacist             |
| ~~~     | ~~~                                  | Mrs Ann White              | Pharmacist             |
| ~~~     | ~~~                                  | Mrs Monica Gauntlett       | Pharmacist             |
| ~~~     | ~~~                                  | Ms Alison Rosoman          | Pharmacist             |
| ~~~     | ~~~                                  | Ms Heather Perry           | Pharmacist             |
| UK      | Worthing: Worthing Hosp              | Dr Ashok Nikapota          | Site PI                |
| ~~~     | ~~~                                  | Dr David Bloomfield        | Clinical/Surgical      |
| ~~~     | ~~~                                  | Dr George Plataniotis      | Clinical/Surgical      |
| ~~~     | ~~~                                  | Miss Raquel Gomez-Marcos   | Point of contact (1st) |
| ~~~     | ~~~                                  | Ms Chloe Hoskins           | Point of contact (1st) |
| ~~~     | ~~~                                  | Ms Marian Flynn-Batham     | Point of contact (1st) |
| ~~~     | ~~~                                  | Ms Sarah Rippin            | Point of contact (1st) |
| ~~~     | ~~~                                  | Mr Tan Tsawayo             | Point of contact (2nd) |
| ~~~     | ~~~                                  | Mrs Sarah Funnell          | Point of contact (2nd) |
| ~~~     | ~~~                                  | Miss Paula Wakelen         | Research Nurse         |
| ~~~     | ~~~                                  | Ms Dawn Crowe (nee Hughes) | Research Nurse         |
| ~~~     | ~~~                                  | Ms Jeanette Gilbert        | Research Nurse         |
| ~~~     | ~~~                                  | Ms Linda Folkes            | Research Nurse         |
| ~~~     | ~~~                                  | Ms Nikki Turner            | Research Nurse         |

## INVESTIGATORS AND COLLABORATORS: SITE STAFF

Staff on site delegation logs

| Country | Site                         | Names                 | Role                   |
|---------|------------------------------|-----------------------|------------------------|
| ~~~     | ~~~                          | Ms Sally Moore        | Research Nurse         |
| ~~~     | ~~~                          | Mr Matthew Smith      | Trial Coordinator      |
| ~~~     | ~~~                          | Ms Celia Gonzalez     | Pharmacist             |
| UK      | Wycombe: Wycombe Hosp        | Dr Katherine Hyde     | Site PI                |
| ~~~     | ~~~                          | Dr Ami Sabharwal      | Clinical/Surgical      |
| ~~~     | ~~~                          | Dr Andrew Weaver      | Clinical/Surgical      |
| ~~~     | ~~~                          | Dr Joanne Brady       | Clinical/Surgical      |
| ~~~     | ~~~                          | Dr Niki Panakis       | Clinical/Surgical      |
| ~~~     | ~~~                          | Dr Philip Camilleri   | Clinical/Surgical      |
| ~~~     | ~~~                          | Dr Thinn Pwint        | Clinical/Surgical      |
| ~~~     | ~~~                          | Prof Andrew Protheroe | Clinical/Surgical      |
| ~~~     | ~~~                          | Dr Janice Carpenter   | Point of contact (1st) |
| ~~~     | ~~~                          | Mrs Anita Cserbane    | Point of contact (1st) |
| ~~~     | ~~~                          | Mrs Alice Ngumo       | Point of contact (2nd) |
| ~~~     | ~~~                          | Ms Emma Hogbin        | Research Nurse         |
| ~~~     | ~~~                          | Ms Hazel Wynn         | Research Nurse         |
| ~~~     | ~~~                          | Ms Sarah Manyangadze  | Research Nurse         |
| ~~~     | ~~~                          | Mrs Manisha Joshi     | Data Manager           |
| ~~~     | ~~~                          | Miss Claire Fernandez | Research Asst          |
| ~~~     | ~~~                          | Ms Susan McLain-Smith | Research Asst          |
| ~~~     | ~~~                          | Mr Rahul Kurup        | Administrator          |
| ~~~     | ~~~                          | Mr Neil Trew-Smith    | Pharmacist             |
| ~~~     | ~~~                          | Ms Roisin Kavanagh    | Pharmacist             |
| ~~~     | ~~~                          | Mr Neil Trewwsmith    | Other                  |
| UK      | Yeovil: Yeovil District Hosp | Mr Tim Porter         | Site PI                |
| ~~~     | ~~~                          | Dr Emma Gray          | Clinical/Surgical      |
| ~~~     | ~~~                          | Dr Erica Beaumont     | Clinical/Surgical      |
| ~~~     | ~~~                          | Dr Geoffrey Sparrow   | Clinical/Surgical      |
| ~~~     | ~~~                          | Dr Shiyam Kumar       | Clinical/Surgical      |
| ~~~     | ~~~                          | Mrs Joanna Allison    | Point of contact (1st) |
| ~~~     | ~~~                          | Mrs Joanne Macrory    | Point of contact (1st) |
| ~~~     | ~~~                          | Mrs Kerry Rennie      | Point of contact (1st) |
| ~~~     | ~~~                          | Miss Jess Perry       | Point of contact (2nd) |
| ~~~     | ~~~                          | Mr Nigel Beer         | Research Nurse         |

## INVESTIGATORS AND COLLABORATORS: SITE STAFF

Staff on site delegation logs

| Country | Site                     | Names                      | Role                   |
|---------|--------------------------|----------------------------|------------------------|
| ~~~     | ~~~                      | Mrs Lucy Pippard           | Research Nurse         |
| ~~~     | ~~~                      | Ms Shirley Fox             | Research Nurse         |
| ~~~     | ~~~                      | Ms Barbara Williams-Yesson | Trial Coordinator      |
| ~~~     | ~~~                      | Miss Kate Beesley          | Administrator          |
| ~~~     | ~~~                      | Mrs Michelle Kotze         | Administrator          |
| ~~~     | ~~~                      | Miss Claire Barron         | Pharmacist             |
| ~~~     | ~~~                      | Mr David Donaldson         | Pharmacist             |
| ~~~     | ~~~                      | Mrs Tracey Duckett         | Pharmacist             |
| UK      | York: York District Hosp | Dr Joji Joseph             | Site PI                |
| ~~~     | ~~~                      | Dr David Bottomley         | Clinical/Surgical      |
| ~~~     | ~~~                      | Dr Hima Bindu Musunuru     | Clinical/Surgical      |
| ~~~     | ~~~                      | Dr Russ Wilson             | Clinical/Surgical      |
| ~~~     | ~~~                      | Mr Michael Stower          | Clinical/Surgical      |
| ~~~     | ~~~                      | Mr Paul Brittain           | Point of contact (1st) |
| ~~~     | ~~~                      | Mrs Flor Davies            | Point of contact (1st) |
| ~~~     | ~~~                      | Mrs Paula Strider          | Point of contact (1st) |
| ~~~     | ~~~                      | Mrs Claire Brookes         | Point of contact (2nd) |
| ~~~     | ~~~                      | Mr Mark Fearnley           | Research Nurse         |
| ~~~     | ~~~                      | Mrs Jane Balderson         | Research Nurse         |
| ~~~     | ~~~                      | Mrs Jo Ingham              | Research Nurse         |
| ~~~     | ~~~                      | Mrs Lisa Mole              | Research Nurse         |
| ~~~     | ~~~                      | Mrs Nora Youngs            | Research Nurse         |
| ~~~     | ~~~                      | Ms Carol Taylor            | Research Nurse         |
| ~~~     | ~~~                      | Ms Emma Giddings           | Research Nurse         |
| ~~~     | ~~~                      | Ms Fereshteh Fallah        | Research Nurse         |
| ~~~     | ~~~                      | Ms Hilary Campbell         | Research Nurse         |
| ~~~     | ~~~                      | Ms Joanna Todd             | Research Nurse         |
| ~~~     | ~~~                      | Ms Lucy Howard             | Research Nurse         |
| ~~~     | ~~~                      | Mr Andy Holbrook           | Trial Coordinator      |
| ~~~     | ~~~                      | Mrs Srilakshmi Gollapothu  | Data Manager           |
| ~~~     | ~~~                      | Miss Shamila Saleem        | Research Asst          |
| ~~~     | ~~~                      | Mr Louis Thackray          | Research Asst          |
| ~~~     | ~~~                      | Ms Monica Campos           | Research Asst          |
| ~~~     | ~~~                      | Miss Lorna Bowling         | Pharmacist             |

## INVESTIGATORS AND COLLABORATORS: SITE STAFF

Staff on site delegation logs

| Country | Site | Names                 | Role       |
|---------|------|-----------------------|------------|
| ~~~     | ~~~  | Mr John Wightman      | Pharmacist |
| ~~~     | ~~~  | Mr Mark Elliott       | Pharmacist |
| ~~~     | ~~~  | Mr Richard Evans      | Pharmacist |
| ~~~     | ~~~  | Mrs Christine Jakeman | Pharmacist |
| ~~~     | ~~~  | Ms Michelle Donnison  | Pharmacist |
| ~~~     | ~~~  | Ms Rachel Conway      | Pharmacist |
| ~~~     | ~~~  | Ms Sally Harvey       | Pharmacist |
| ~~~     | ~~~  | Ms Sarah Pashley      | Other      |



## **PARTICIPANTS**

Approximately 4,000 people chose to participate in RADICALS. In addition to their care teams, they have been supported by family, friends and other key people. Every person who has participated in the trial is appreciated by the trial team and should be appreciated by the wider public. The findings from clinical trials can change practice for the future, but clinical trials only happen because people find the time and make the effort to support them. Thank you.

MRC

Clinical  
Trials  
Unit

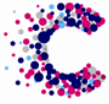

CANCER  
RESEARCH  
UK

Canadian Cancer  
Trials Group  Groupe canadien  
des essais sur le cancer

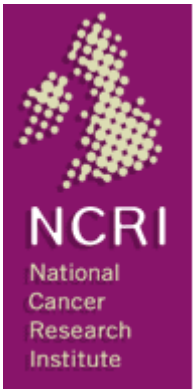

## RADICALS

### Radiotherapy and Androgen Deprivation In Combination After Local Surgery

#### A randomised controlled trial in prostate cancer

**Version:** 7.0  
**Date:** 17<sup>th</sup> February 2020

**MRC CTU ID:** PR10  
**ISRCTN #:** ISRCTN 40814031  
**NCT #:** NCT00541047  
**EUDRACT #:** 2006-000205-34  
**CTA #:** 20363/0402/001-0031  
**MREC #:** 07/Q0501/48

**Authorised by:**  
**Name:** Professor Chris Parker  
**Role:** Chief Investigator  
**Date:** 17<sup>th</sup> February 2020  
**Signature:**

A handwritten signature in black ink, appearing to read 'C Parker', enclosed in a white rectangular box.

**Name:** Professor Matthew Sydes  
**Role:** Trial Statistician/Project Lead  
**Date:**  
**Signature:**

## GENERAL INFORMATION

This document was constructed using the MRC CTU Protocol Template Version 7.0. It describes the RADICALS trial, coordinated by the Medical Research Council (MRC) Clinical Trials Unit (CTU) at University College London (UCL), and provides information about procedures for entering patients into it. The protocol should not be used as an aide-memoire or guide for the treatment of other patients. Every care has been taken in drafting this protocol, but corrections or amendments may be necessary. These will be circulated to the registered investigators in the trial, but sites entering patients for the first time are advised to contact the trial team to confirm they have the most up-to-date version.

## COMPLIANCE

The trial will be conducted in compliance with the approved protocol, the Declaration of Helsinki 1996, the principles of Good Clinical Practice (GCP) as laid down by the ICH topic E6 (R2), Commission Clinical Trials Directive 2005/28/EC\* with the implementation in national legislation in the UK by Statutory Instrument 2004/1031 and subsequent amendments, General Data Protection Regulation and the UK Data Protection Act 2018 (DPA number: Z6364106), and the UK Policy Framework for Health and Social Care Research.

\*Until the Clinical Trials Regulation EU No 536/2014 becomes applicable, the trial will be conducted in accordance with the Clinical Trials Directive as implemented in the UK statutory instrument. When the directive is repealed on the day of entry into application of the Clinical Trial Regulation the trial will work towards implementation of the Regulation (536/2014) following any transition period.

International sites will comply with the principles of GCP as laid down by the ICH topic E6 (R2) and other applicable national regulations.

## SPONSOR

UCL is the trial Sponsor and has delegated responsibility for the overall management of the trial to the MRC CTU at UCL. Queries relating to UCL sponsorship of this trial should be addressed to Professor Mahesh Parmar, MRC CTU at UCL Director, MRC CTU at UCL, Institute of Clinical Trials & Methodology, 90 High Holborn 2nd Floor, London, WC1V 6LJ.

The Canadian Cancer Trials Group (CCTG) (previously NCIC Clinical Trials Group) have been delegated certain Sponsor activities and functions for Canadian sites.

## FUNDING

|                   |                                                                                                                                                                                          |
|-------------------|------------------------------------------------------------------------------------------------------------------------------------------------------------------------------------------|
| Funders in UK:    | Clinical Trials Advisory Awards Committee (on behalf of Cancer Research UK)<br>Grant Reference Number: C7829/A6381<br>Medical Research Council<br>Grant Reference Number: MC_UU_12023/28 |
| Funder in Canada: | Canadian Cancer Society – Research Institute<br>Grant Reference Number: 704970                                                                                                           |

## **AUTHORISATIONS AND APPROVALS**

This trial was approved by the Royal Free & Medical School Research Ethics Committee and is part of the UK National Cancer Research Network (NCRN) research network portfolio.

The following persons are authorised to sign the final protocol and protocol amendments for the sponsor: Professor Chris Parker (Chief Investigator) and Professor Matthew Sydes (Trial Statistician/Project Lead).

## **TRIAL REGISTRATION**

This trial has been registered with the ClinicalTrials.gov Clinical Trials Register, where it is identified as NCT00541047.

## **CLINICAL CENTRES**

RADICALS is open to accredited centres in Cancer Research Networks across the UK. It is also open at centres in Canada (in collaboration with the Canadian Cancer Trials Group), Denmark and Ireland.

### **SAE REPORTING**

Within 24 hours of becoming aware of an SAE, please fax a completed SAE form to the MRC CTU at UCL on:  
**Fax: +44 (0) 20 7670 4818** or via email to **[mrcctu.radicals@ucl.ac.uk](mailto:mrcctu.radicals@ucl.ac.uk)**

## INFORMATION FOR MRC INVESTIGATORS

### SCIENTIFIC APPROVAL

The RADICALS trial has been scientifically approved by the Clinical Trials Awards and Advisory Committee (CTAAC) of Cancer Research UK and is thus part of the NCRN/NCRI portfolio of prostate cancer trials.

### ETHICS APPROVAL

Royal Free Hospital Research Ethics Committee. Ref: 07/Q0501/48, 23<sup>rd</sup> April 2007

### REGULATORY APPROVAL

CTA reference 20363/0402/001-0031, 27<sup>th</sup> April 2007

### FINANCE

No payments will be made to centres because approaches are standard, and no free or discounted drugs are provided. This trial is NRCN adopted and therefore UK NCRN nurse time will be available to support the study.

### CHIEF INVESTIGATOR/MEDICAL EXPERT

Professor Chris Parker      Royal Marsden Hospital & Institute of Cancer Research, Sutton,  
SM2 5PT  
T: + 44 (0)208 661 3425 E: Chris.Parker@icr.ac.uk

### TRIAL ADMINISTRATION

Please direct all queries to the Trial Manager at MRC CTU at UCL in the first instance; clinical queries will be passed to the Chief Investigator via the Trial Manager.

### COORDINATING UNIT

|                                       |              |                           |
|---------------------------------------|--------------|---------------------------|
| MRC Clinical Trials Unit at UCL       | Switchboard: | 020 7670 4700             |
| 90 High Holborn 2 <sup>nd</sup> Floor | Fax:         | 020 7670 4818             |
| London                                | Email:       | mrcctu.radicals@ucl.ac.uk |
| WC1V 6LJ                              |              |                           |
| UK                                    |              |                           |

### MRC CTU AT UCL STAFF

|                          |                   |           |
|--------------------------|-------------------|-----------|
| Trial Manager:           | Holly Pickering   | extn 4636 |
| Data Manager:            | Christos Maniatis | extn 4838 |
| Clinical Project Manager | Silivia Forcat    | extn 4825 |
| Statistician:            | Adrian Cook       | extn 4639 |
| Project Lead:            | Matthew Sydes     | extn 4798 |

For full details of all trial committees, please see [Appendix A](#)

NB: throughout this document, "MRC CTU at UCL" is generally abbreviated to "CTU".

## INFORMATION FOR CCTG INVESTIGATORS

### SCIENTIFIC APPROVAL

Canadian Cancer Trials Group (CCTG)

### FINANCE

The rate of per case funding is the standard per case funding amount for each patient enrolled at each centre. For more information please see:

[http://www.ctg.queensu.ca/trials/generic\\_forms\\_public/centre\\_funding.pdf](http://www.ctg.queensu.ca/trials/generic_forms_public/centre_funding.pdf)

### CCTG CHIEF INVESTIGATORS/MEDICAL EXPERTS

Charles Catton  
Princess Margaret Hospital, Toronto, Canada  
T :+1-416-946-2000  
E :charles.catton@rmp.uhn.on.ca

Fred Saad  
Montreal University, Montreal, Canada  
T:+1-514-890-8000 ext 27466  
E: fredsaad@videotron.ca

### CCTG STAFF

|                                 |                 |                                                                             |
|---------------------------------|-----------------|-----------------------------------------------------------------------------|
| CCTG Study Coordinator:         | Cathy Davidson  | E: <a href="mailto:cdavidson@ctg.queensu.ca">cdavidson@ctg.queensu.ca</a>   |
| CCTG Clinical Trials Assistant: | Amy Hawkins     | E: <a href="mailto:ahawkins@ctg.queensu.ca">ahawkins@ctg.queensu.ca</a>     |
| Senior Investigator:            | Wendy Parulekar | E: <a href="mailto:wparulekar@ctg.queensu.ca">wparulekar@ctg.queensu.ca</a> |
| T: +1 613-533-6430              |                 |                                                                             |
| F: +1 613-533-2941              |                 |                                                                             |

### SAE NOTIFICATION

Report to the CCTG Central Office by telephone and/or fax within 24 hours of the event.  
SAEs must be reported on the Serious Adverse Event Form.

**Tel: 613-533-4630 Fax: 613-533-2941**

## CONTENTS

|                                                                                                             |           |
|-------------------------------------------------------------------------------------------------------------|-----------|
| <b>GENERAL INFORMATION</b> .....                                                                            | <b>II</b> |
| <b>INFORMATION FOR MRC INVESTIGATORS</b> .....                                                              | <b>IV</b> |
| <b>INFORMATION FOR CCTG INVESTIGATORS</b> .....                                                             | <b>V</b>  |
| <b>CONTENTS</b> .....                                                                                       | <b>1</b>  |
| <b>ABBREVIATIONS AND GLOSSARY</b> .....                                                                     | <b>5</b>  |
| <b>TRIAL SUMMARY</b> .....                                                                                  | <b>7</b>  |
| <b>1 BACKGROUND</b> .....                                                                                   | <b>14</b> |
| 1.1 INTRODUCTION .....                                                                                      | 14        |
| 1.2 RATIONALE AND OBJECTIVES.....                                                                           | 14        |
| 1.3 THE CASE FOR A TRIAL OF IMMEDIATE VERSUS EARLY SALVAGE TREATMENT AFTER RADICAL PROSTATECTOMY.....       | 14        |
| 1.4 THE CASE FOR A TRIAL OF HORMONE THERAPY DURATION IN MEN RECEIVING RADIOTHERAPY POST-PROSTATECTOMY ..... | 15        |
| 1.5 OTHER ONGOING RELEVANT STUDIES AND TRIALS.....                                                          | 17        |
| 1.5.1 RADICALS-RT.....                                                                                      | 17        |
| 1.5.2 RADICALS-HD .....                                                                                     | 17        |
| 1.5.3 Other trials.....                                                                                     | 17        |
| 1.6 RISKS AND BENEFITS .....                                                                                | 18        |
| 1.7 CONCLUSIONS.....                                                                                        | 18        |
| <b>3 SELECTION OF CENTRES AND CLINICIANS</b> .....                                                          | <b>19</b> |
| <b>2 SELECTION OF PATIENTS</b> .....                                                                        | <b>20</b> |
| 2.1 INVESTIGATIONS PRIOR TO EACH RANDOMISATION.....                                                         | 21        |
| <b>3 RANDOMISATION &amp; ENROLMENT</b> .....                                                                | <b>22</b> |
| 3.1 TRIAL RANDOMISATION OPTIONS.....                                                                        | 22        |
| 3.1.1 RADICALS-RT: Radiotherapy Timing Randomisation .....                                                  | 22        |
| 3.1.2 RADICALS-HD: Hormone Duration Randomisation .....                                                     | 22        |
| 3.2 RANDOMISATION CONTACTS .....                                                                            | 22        |
| 3.3 CO-ENROLMENT GUIDELINES .....                                                                           | 22        |
| <b>4 TREATMENT OF PATIENTS</b> .....                                                                        | <b>23</b> |
| 4.1 GUIDANCE FOR RADICALS-RT.....                                                                           | 23        |
| 4.1.1 Early post-op radiotherapy.....                                                                       | 23        |
| 4.1.2 Deferred radiotherapy.....                                                                            | 23        |
| 4.1.3 Radiotherapy technique .....                                                                          | 23        |
| 4.2 GUIDANCE FOR RADICALS-HD .....                                                                          | 26        |
| 4.2.1 RT alone .....                                                                                        | 26        |
| 4.2.2 Short-term hormone therapy plus RT .....                                                              | 27        |
| 4.3 PROTOCOL TREATMENT DISCONTINUATION .....                                                                | 27        |

|            |                                                    |           |
|------------|----------------------------------------------------|-----------|
| <b>4.4</b> | <b>ACCOUNTABILITY AND UNUSED DRUGS.....</b>        | <b>28</b> |
| <b>4.5</b> | <b>MEASURES OF COMPLIANCE AND ADHERENCE.....</b>   | <b>28</b> |
| <b>4.6</b> | <b>NON-TRIAL TREATMENT .....</b>                   | <b>28</b> |
| 4.6.1      | Medications permitted/not permitted .....          | 28        |
| 4.6.2      | Data on concomitant medication.....                | 28        |
| <b>4.7</b> | <b>CO-ENROLMENT GUIDELINES .....</b>               | <b>28</b> |
| <b>5</b>   | <b>ASSESSMENTS AND FOLLOW-UP .....</b>             | <b>29</b> |
| <b>5.1</b> | <b>CASE REPORT FORM TIMINGS.....</b>               | <b>29</b> |
| <b>5.2</b> | <b>PROCEDURES FOR ASSESSING EFFICACY.....</b>      | <b>29</b> |
| 5.2.1      | PSA measurements.....                              | 29        |
| 5.2.2      | Efficacy parameters.....                           | 29        |
| <b>5.3</b> | <b>PROCEDURES FOR ASSESSING SAFETY .....</b>       | <b>30</b> |
| <b>5.4</b> | <b>OTHER ASSESSMENTS .....</b>                     | <b>30</b> |
| 5.4.1      | Patient reported outcomes .....                    | 30        |
| 5.4.2      | Health economics .....                             | 30        |
| <b>5.5</b> | <b>EARLY STOPPING OF FOLLOW-UP .....</b>           | <b>30</b> |
| <b>5.6</b> | <b>LOSS TO FOLLOW-UP .....</b>                     | <b>30</b> |
| <b>5.7</b> | <b>PATIENT TRANSFERS .....</b>                     | <b>31</b> |
| 5.7.1      | Mortality data from Electronic Health Records..... | 31        |
| <b>5.8</b> | <b>END OF TRIAL .....</b>                          | <b>31</b> |
| <b>6</b>   | <b>STATISTICAL CONSIDERATIONS .....</b>            | <b>33</b> |
| <b>6.1</b> | <b>METHOD OF RANDOMISATION.....</b>                | <b>33</b> |
| <b>6.2</b> | <b>OUTCOME MEASURES .....</b>                      | <b>33</b> |
| 6.2.1      | Primary outcome measure - RADICALS-RT.....         | 33        |
| 6.2.2      | Primary outcome measure – RADICALS-HD .....        | 33        |
| 6.2.3      | Secondary outcome measures .....                   | 34        |
| 6.2.4      | Early reporting of biochemical outcomes .....      | 34        |
| <b>6.3</b> | <b>SAMPLE SIZE .....</b>                           | <b>34</b> |
| 6.3.1      | Basic assumptions .....                            | 34        |
| 6.3.2      | RADICALS-RT sample size .....                      | 35        |
| 6.3.3      | RADICALS-HD sample size.....                       | 35        |
| 6.3.4      | Overall sample size.....                           | 37        |
| 6.3.5      | Pilot phase .....                                  | 37        |
| <b>6.4</b> | <b>INTERIM MONITORING AND ANALYSES .....</b>       | <b>37</b> |
| <b>6.5</b> | <b>STATISTICAL ANALYSIS PLAN.....</b>              | <b>38</b> |
| <b>6.6</b> | <b>INDIVIDUAL PATIENT DATA META-ANALYSIS.....</b>  | <b>38</b> |
| 6.6.1      | RADICALS-RT.....                                   | 38        |
| 6.6.2      | RADICALS-HD .....                                  | 38        |
| <b>7</b>   | <b>QUALITY ASSURANCE AND CONTROL.....</b>          | <b>39</b> |
| <b>7.1</b> | <b>COMPLIANCE .....</b>                            | <b>39</b> |
| <b>7.2</b> | <b>RADIOTHERAPY QUALITY ASSURANCE.....</b>         | <b>39</b> |
| <b>7.3</b> | <b>MONITORING AND AUDIT .....</b>                  | <b>39</b> |
| <b>7.4</b> | <b>SOURCE DATA.....</b>                            | <b>39</b> |
| 7.4.1      | Data Handling .....                                | 40        |
| <b>7.5</b> | <b>PROTOCOL DEVIATIONS.....</b>                    | <b>40</b> |



|             |                                                                  |           |
|-------------|------------------------------------------------------------------|-----------|
| <b>8</b>    | <b>SAFETY REPORTING</b> .....                                    | <b>41</b> |
| <b>8.1</b>  | <b>DEFINITIONS</b> .....                                         | <b>41</b> |
| <b>8.2</b>  | <b>CLARIFICATIONS</b> .....                                      | <b>41</b> |
| 8.2.1       | Medicinal Products.....                                          | 42        |
| 8.2.2       | Adverse Events .....                                             | 42        |
| <b>8.3</b>  | <b>DISEASE RELATED EVENTS AND ELECTIVE HOSPITALISATION</b> ..... | <b>42</b> |
| 8.3.1       | Institution Responsibilities .....                               | 42        |
| 8.3.2       | Investigator Responsibilities.....                               | 43        |
| 8.3.3       | Investigator Assessment.....                                     | 43        |
| <b>8.4</b>  | <b>CTU RESPONSIBILITIES</b> .....                                | <b>45</b> |
| <b>9</b>    | <b>ETHICAL CONSIDERATIONS</b> .....                              | <b>47</b> |
| <b>10</b>   | <b>ANCILLARY STUDIES</b> .....                                   | <b>48</b> |
| <b>10.1</b> | <b>PATIENT-REPORTED OUTCOMES</b> .....                           | <b>48</b> |
| <b>10.2</b> | <b>HEALTH ECONOMICS</b> .....                                    | <b>48</b> |
| <b>10.3</b> | <b>TRANSLATIONAL RESEARCH</b> .....                              | <b>48</b> |
| <b>11</b>   | <b>APPROVALS AND INDEMNITY</b> .....                             | <b>49</b> |
| <b>11.1</b> | <b>ETHICS APPROVALS</b> .....                                    | <b>49</b> |
| <b>11.2</b> | <b>REGULATORY APPROVAL</b> .....                                 | <b>49</b> |
| <b>11.3</b> | <b>INDEMNITY</b> .....                                           | <b>49</b> |
| <b>12</b>   | <b>TRIAL COMMITTEES</b> .....                                    | <b>50</b> |
| <b>12.1</b> | <b>TRIAL MANAGEMENT GROUP (TMG)</b> .....                        | <b>50</b> |
| <b>12.2</b> | <b>TRIAL STEERING COMMITTEE (TSC)</b> .....                      | <b>50</b> |
| <b>12.3</b> | <b>INDEPENDENT DATA MONITORING COMMITTEE (IDMC)</b> .....        | <b>50</b> |
| <b>12.4</b> | <b>ENDPOINT REVIEW COMMITTEE (ERC)</b> .....                     | <b>50</b> |
| <b>12.5</b> | <b>QUALITY OF LIFE SUBGROUP</b> .....                            | <b>50</b> |
| <b>12.6</b> | <b>RADIOTHERAPY QUALITY ASSURANCE SUBGROUP</b> .....             | <b>50</b> |
| <b>12.7</b> | <b>PATHOLOGY QUALITY ASSURANCE SUBGROUP</b> .....                | <b>50</b> |
| <b>12.8</b> | <b>TRANSLATIONAL STUDIES GROUP</b> .....                         | <b>51</b> |
| <b>13</b>   | <b>PUBLICATION AND DISSEMINATION OF RESULTS</b> .....            | <b>52</b> |
| <b>14</b>   | <b>PROTOCOL AMENDMENTS</b> .....                                 | <b>53</b> |
| <b>14.1</b> | <b>PROTOCOL</b> .....                                            | <b>53</b> |
| 14.1.1      | Amendments made to Protocol version 1.0 March 2007 .....         | 53        |
| 14.1.2      | Amendments made to Protocol version 1.1 June 2007 .....          | 53        |
| 14.1.3      | Amendments made to Protocol version 2.0 January 2008 .....       | 53        |
| 14.1.4      | Amendments made to Protocol version 2.2 December 2008.....       | 54        |
| 14.1.5      | Amendments made to Protocol version 3.0 October 2009 .....       | 54        |
| 14.1.6      | Amendments made to Protocol version 4.0 June 2011 .....          | 56        |
| 14.1.7      | Amendments made to Protocol Version 5.0 March 2014.....          | 56        |
| 14.1.8      | Amendments made to Protocol Version 6.0 December 2018 .....      | 57        |
| <b>14.2</b> | <b>APPENDICES</b> .....                                          | <b>58</b> |
| 14.2.1      | Amendments made to Appendix A version 1.0 March 2007 .....       | 58        |
| 14.2.2      | Amendments made to Appendix B version 1.0 March 2007 .....       | 58        |
| 14.2.3      | Amendments made to Appendix A version 1.0 June 2007 .....        | 59        |

14.2.4 Amendments made to Appendix B version 1.1 June 2007 .....59

14.2.5 Amendments made to Appendix A version 2.0 January 2008 .....59

14.2.6 Amendments made to Appendix A version 2.2 December 2008 .....59

14.2.7 Amendments made to Appendix B version 2.1 December 2008 .....59

14.2.8 Amendments made to Appendix A version 3.0 October 2009.....59

14.2.9 Amendments made to Appendix B version 3.0 October 2009.....59

14.2.10 Amendments made to Appendix A version 4.0 June 2011 .....60

14.2.11 Amendments made to Appendices version 5.0 March 2014 .....60

**15 REFERENCES..... 61**

## ABBREVIATIONS AND GLOSSARY

| Abbreviation | Expansion                                                  |
|--------------|------------------------------------------------------------|
| AD           | Androgen Deprivation                                       |
| AE           | Adverse event                                              |
| AP           | Anterior/Posterior                                         |
| AR           | Adverse reaction                                           |
| ARO          | Academic Radiation Oncology                                |
| BAUS         | British Association of Urological Surgeons                 |
| CCTG         | Canadian Cancer Trials Group                               |
| CF           | Consent form                                               |
| CI           | Chief Investigator                                         |
| CI           | Confidence Interval                                        |
| CRF          | Case Report Form                                           |
| CT           | Computerised Tomography                                    |
| CTA          | Clinical Trials Authorisation                              |
| CTAAC        | Clinical Trials Awards and Advisory Committee              |
| CTCAE        | Common Terminology Criteria for Adverse Events             |
| CTG          | Clinical Trials Group                                      |
| CTU          | Clinical Trials Unit                                       |
| CTV          | Clinical Target Volume                                     |
| DCF          | Data Clarification Form                                    |
| DMC          | Data Monitoring Committee                                  |
| DSS          | Disease Specific Survival                                  |
| EORTC        | European Organisation for Research and Treatment of Cancer |
| EPC          | Early Prostate Cancer                                      |
| ERC          | Endpoint Review Committee                                  |
| EU           | European Union                                             |
| EudraCT      | European Union Drug Regulatory Agency Clinical Trial       |
| FBC          | Full Blood Count                                           |
| FFDM         | Freedom from distant metastasis                            |
| FFTF         | Freedom From Treatment Failure                             |
| GCP          | Good Clinical Practice                                     |
| GnRHa        | Gonadotrophin releasing hormone analogue                   |
| GRO          | General Registrar's Office                                 |
| GS           | Gleason Score                                              |
| HE           | Health Economics                                           |
| HR           | Hazard Ratio                                               |
| HT           | Hormone Therapy                                            |
| IB           | Investigator's Brochure                                    |
| ICH          | International Conference of Harmonisation                  |
| IDMC         | Independent Data Monitoring Committee                      |
| IMP          | Investigational Medicinal Products                         |
| IRB          | Institutional Review Board                                 |
| ISRCTN       | International standard randomised controlled trial number  |
| JCOG         | Japanese Clinical Oncology Group                           |
| LHRH         | Luteinising Hormone-Releasing Hormone                      |

|             |                                                                          |
|-------------|--------------------------------------------------------------------------|
| LR          | Left/Right                                                               |
| LREC        | Local Research Ethics Committee                                          |
| LTHT        | Long Term Hormone Therapy                                                |
| MFS         | Metastasis free survival                                                 |
| MHRA        | Medicines and Healthcare Regulatory Authority                            |
| MLC         | Multi-leaf Collimation                                                   |
| MRC         | Medical Research Council                                                 |
| MRI         | Magnetic Resonance Imaging                                               |
| NCIC CTG    | NCIC Clinical Trials Group                                               |
| NCRI        | National Cancer Research Institute                                       |
| NCRN        | National Cancer Research Network                                         |
| NHS         | National Health Service                                                  |
| NHSCR       | National Health Service Central Register                                 |
| ONS         | Office for National Statistics                                           |
| PFS         | Progression Free Survival                                                |
| PI          | Principal Investigator                                                   |
| PIS         | Patient information Sheet                                                |
| PSA         | Prostate Specific Antigen                                                |
| PTV         | Planning Target Volume                                                   |
| QA          | Quality Assurance                                                        |
| QL          | Quality of life                                                          |
| RADICALS    | Radiotherapy and Androgen Deprivation In Combination After Local Surgery |
| RADICALS-RT | RADICALS Radiotherapy Timing Randomisation                               |
| RADICALS-HD | RADICALS Hormone Duration Randomisation                                  |
| RCT         | Randomised Controlled Trial                                              |
| RP          | Radical Prostatectomy                                                    |
| RT          | Radiotherapy                                                             |
| RTOG        | Radiation Therapy Oncology Group                                         |
| SAE         | Serious adverse event                                                    |
| SAR         | Serious adverse reaction                                                 |
| SF12        | Short Form 12                                                            |
| SI          | Superior/Inferior                                                        |
| SmPC        | Summary of Product Characteristics                                       |
| SOP         | Standard operating procedures                                            |
| SPC         | Summary of product characteristics                                       |
| SSA         | Site specific assessment                                                 |
| STHT        | Short Term Hormone Therapy                                               |
| SUSAR       | Suspected unexpected serious adverse reaction                            |
| SV          | Seminal Vesicle                                                          |
| SWOG        | South West Oncology Group                                                |
| tds         | Three times daily                                                        |
| TMG         | Trial Management Group                                                   |
| TSC         | Trial Steering Committee                                                 |
| TROG        | Trans-Tasman Radiation Oncology Group                                    |
| UAR         | Unexpected adverse reaction                                              |

## TRIAL SUMMARY

| SUMMARY INFORMATION TYPE | SUMMARY DETAILS                                                                                                                                                                                                                                                                                                                                                                                                                                                                                                                                                                                                                                                                                                                                                                                                                                                                                                                                                                                                                                                                                                                                                                                                                                                                                                                                                                                                                                                                                                                                                                                |
|--------------------------|------------------------------------------------------------------------------------------------------------------------------------------------------------------------------------------------------------------------------------------------------------------------------------------------------------------------------------------------------------------------------------------------------------------------------------------------------------------------------------------------------------------------------------------------------------------------------------------------------------------------------------------------------------------------------------------------------------------------------------------------------------------------------------------------------------------------------------------------------------------------------------------------------------------------------------------------------------------------------------------------------------------------------------------------------------------------------------------------------------------------------------------------------------------------------------------------------------------------------------------------------------------------------------------------------------------------------------------------------------------------------------------------------------------------------------------------------------------------------------------------------------------------------------------------------------------------------------------------|
| [Acronym or short title] | RADICALS                                                                                                                                                                                                                                                                                                                                                                                                                                                                                                                                                                                                                                                                                                                                                                                                                                                                                                                                                                                                                                                                                                                                                                                                                                                                                                                                                                                                                                                                                                                                                                                       |
| Long Title of Trial      | Radiotherapy and Androgen Deprivation in Combination After Local Surgery: A randomised controlled trial in prostate cancer                                                                                                                                                                                                                                                                                                                                                                                                                                                                                                                                                                                                                                                                                                                                                                                                                                                                                                                                                                                                                                                                                                                                                                                                                                                                                                                                                                                                                                                                     |
| Version                  | 7.0                                                                                                                                                                                                                                                                                                                                                                                                                                                                                                                                                                                                                                                                                                                                                                                                                                                                                                                                                                                                                                                                                                                                                                                                                                                                                                                                                                                                                                                                                                                                                                                            |
| Date                     | 17 <sup>th</sup> February 2020                                                                                                                                                                                                                                                                                                                                                                                                                                                                                                                                                                                                                                                                                                                                                                                                                                                                                                                                                                                                                                                                                                                                                                                                                                                                                                                                                                                                                                                                                                                                                                 |
| MRC CTU at UCL ID        | PR10                                                                                                                                                                                                                                                                                                                                                                                                                                                                                                                                                                                                                                                                                                                                                                                                                                                                                                                                                                                                                                                                                                                                                                                                                                                                                                                                                                                                                                                                                                                                                                                           |
| ISRCTN #                 | 40814031                                                                                                                                                                                                                                                                                                                                                                                                                                                                                                                                                                                                                                                                                                                                                                                                                                                                                                                                                                                                                                                                                                                                                                                                                                                                                                                                                                                                                                                                                                                                                                                       |
| NCT #                    | NCT00541047                                                                                                                                                                                                                                                                                                                                                                                                                                                                                                                                                                                                                                                                                                                                                                                                                                                                                                                                                                                                                                                                                                                                                                                                                                                                                                                                                                                                                                                                                                                                                                                    |
| EudraCT #                | 2006-000205-34                                                                                                                                                                                                                                                                                                                                                                                                                                                                                                                                                                                                                                                                                                                                                                                                                                                                                                                                                                                                                                                                                                                                                                                                                                                                                                                                                                                                                                                                                                                                                                                 |
| CTA #                    | 20363/0402/001-0031                                                                                                                                                                                                                                                                                                                                                                                                                                                                                                                                                                                                                                                                                                                                                                                                                                                                                                                                                                                                                                                                                                                                                                                                                                                                                                                                                                                                                                                                                                                                                                            |
| MREC #                   | 07/Q0501/48                                                                                                                                                                                                                                                                                                                                                                                                                                                                                                                                                                                                                                                                                                                                                                                                                                                                                                                                                                                                                                                                                                                                                                                                                                                                                                                                                                                                                                                                                                                                                                                    |
| Study Design             | <p>RADICALS is an international, multi-centre, open-labelled, randomised controlled trial in prostate cancer. It is a trial with two separate randomisations for overlapping patient groups.</p> <p>One randomisation was performed within 22 weeks after radical prostatectomy (<b>RADICALS-RT</b> or the <b>Radiotherapy Timing Randomisation</b>; see section 4 for eligibility criteria). In this, patients were randomised between early post-operative radiotherapy and deferred post-operative radiotherapy (for PSA failure).</p> <p>The other randomisation was performed shortly before the administration of post-operative radiotherapy and concerns the addition of hormone therapy (<b>RADICALS-HD</b> or the <b>Hormone Duration Randomisation</b>). In this, patients were randomised between radiotherapy with no hormone therapy, radiotherapy with short-term hormone therapy or radiotherapy with long-term hormone therapy. Randomisation between all three arms was encouraged but patients could be randomised just between short-term and long-term hormone therapy or just between short-term hormone therapy and no hormone therapy.</p> <p>Patients joining the RADICALS-RT were encouraged to join RADICALS-HD (if and when they had RT) but were not required to do so. Patients were required to consent separately to each randomisation. Patients who had not taken part in RADICALS-RT could still enter RADICALS-HD alone if post-operative radiotherapy was clinically indicated, either early post-surgery or in the deferred setting for PSA failure.</p> |
| Setting                  | Participants were recruited from hospitals in the UK, Canada, Denmark and Ireland.                                                                                                                                                                                                                                                                                                                                                                                                                                                                                                                                                                                                                                                                                                                                                                                                                                                                                                                                                                                                                                                                                                                                                                                                                                                                                                                                                                                                                                                                                                             |

| SUMMARY INFORMATION TYPE                  | SUMMARY DETAILS                                                                                                                                                                                                                                                                                                                                                                                                                                                                                                                                                                                                                                                                                                                                                                                                                                                                                                                                                                                                                                                                                                              |
|-------------------------------------------|------------------------------------------------------------------------------------------------------------------------------------------------------------------------------------------------------------------------------------------------------------------------------------------------------------------------------------------------------------------------------------------------------------------------------------------------------------------------------------------------------------------------------------------------------------------------------------------------------------------------------------------------------------------------------------------------------------------------------------------------------------------------------------------------------------------------------------------------------------------------------------------------------------------------------------------------------------------------------------------------------------------------------------------------------------------------------------------------------------------------------|
| <b>Type of Participants to be Studied</b> | Patients with non-metastatic adenocarcinoma of the prostate who have had a radical prostatectomy were eligible for RADICALS. Patients at increased risk of post-operative recurrence (see section 4) were eligible for RADICALS-RT. Patients who were due to receive post-operative RT were eligible for the Hormone Duration Randomisation.                                                                                                                                                                                                                                                                                                                                                                                                                                                                                                                                                                                                                                                                                                                                                                                 |
| <b>Ancillary Studies/Substudies</b>       | Tissue samples were collected and will be considered for future translational projects, subject to funding applications.                                                                                                                                                                                                                                                                                                                                                                                                                                                                                                                                                                                                                                                                                                                                                                                                                                                                                                                                                                                                     |
| <b>Sponsor</b>                            | University College London (previously MRC)                                                                                                                                                                                                                                                                                                                                                                                                                                                                                                                                                                                                                                                                                                                                                                                                                                                                                                                                                                                                                                                                                   |
| <b>Legal Representative in Europe</b>     | UCL Research Limited, Dublin, Ireland                                                                                                                                                                                                                                                                                                                                                                                                                                                                                                                                                                                                                                                                                                                                                                                                                                                                                                                                                                                                                                                                                        |
| <b>Interventions to be Compared</b>       | There are two interventions, radiotherapy and hormone therapy. See <a href="#">Figures 1, 2 and 3</a> .                                                                                                                                                                                                                                                                                                                                                                                                                                                                                                                                                                                                                                                                                                                                                                                                                                                                                                                                                                                                                      |
| <b>Study Hypothesis</b>                   | <p>RADICALS-RT: That the use of early post-operative radiotherapy would improve long-term clinical outcomes after radical prostatectomy</p> <p>RADICALS-HD: That the use of hormone therapy would improve long-term clinical outcomes in men receiving post-operative radiotherapy after radical prostatectomy, and that long-term hormone therapy would be more effective than short-term hormone therapy</p>                                                                                                                                                                                                                                                                                                                                                                                                                                                                                                                                                                                                                                                                                                               |
| <b>Primary Outcome Measure(s)</b>         | <p>RADICALS-RT:<br/>Freedom-from-distant-metastasis (FFDM)</p> <p>RADICALS-HD:<br/>Metastasis-free-survival (MFS)</p>                                                                                                                                                                                                                                                                                                                                                                                                                                                                                                                                                                                                                                                                                                                                                                                                                                                                                                                                                                                                        |
| <b>Secondary Outcome Measure(s)</b>       | <ul style="list-style-type: none"> <li>• Disease-specific survival (DSS) (RADICALS-RT only)</li> <li>• Freedom from treatment failure: PSA progression when on androgen deprivation</li> <li>• Freedom from distant metastasis (FFDM) (HD only)</li> <li>• Clinical progression-free survival (PFS): Clinical progression of prostate cancer or initiation of non-protocol hormone therapy or death from prostate cancer.</li> <li>• Overall survival (OS): Death from any cause</li> <li>• Non-protocol hormone therapy: Initiation of hormone therapy other than that randomised</li> <li>• Treatment toxicity: Incidence of severe toxicity or serious adverse events. Radiotherapy treatment planning data is required to understand the cause of treatment toxicity.</li> <li>• Patient reported outcomes: See <a href="#">Section 13.1</a> for details</li> <li>• Freedom from biochemical progression: Where a biochemical progression event is defined as a PSA level of <math>\geq 0.4</math>ng/ml following radiotherapy or a PSA level of <math>&gt; 2.0</math>ng/ml regardless of prior radiotherapy.</li> </ul> |
| <b>Randomisation</b>                      | 1:1 (RT) +/- 1:1:1 (HD)                                                                                                                                                                                                                                                                                                                                                                                                                                                                                                                                                                                                                                                                                                                                                                                                                                                                                                                                                                                                                                                                                                      |

| SUMMARY INFORMATION TYPE                    | SUMMARY DETAILS                                                                                                                                                                                                                                                                                                                                        |
|---------------------------------------------|--------------------------------------------------------------------------------------------------------------------------------------------------------------------------------------------------------------------------------------------------------------------------------------------------------------------------------------------------------|
| <b>Number of Participants to be Studied</b> | A total of 1396 patients were recruited into RADICALS-RT and 2840 patients into the RADICALS-HD. Many patients contributed to both randomisations. Patients were permitted to be randomised between two of the three arms in RADICALS-HD. For more details refer to <a href="#">Section 9</a> . The trial completed recruitment on 30th December 2016. |
| <b>Duration</b>                             | Trial outcomes for RADICALS-RT and HD are planned to be assessed in 2022.                                                                                                                                                                                                                                                                              |
| <b>Funder</b>                               | CRUK and MRC (UK)<br>CCTG (Canada)                                                                                                                                                                                                                                                                                                                     |
| <b>Chief Investigator</b>                   | Professor Chris Parker                                                                                                                                                                                                                                                                                                                                 |

## TRIAL SCHEMA

### RADICALS-RT: RADIOTHERAPY TIMING RANDOMISATION

See [Figure 1](#)

- Early post-operative RT to prostate bed
- Deferred RT: RT to prostate bed given in the event of PSA failure.

The radiotherapy to be used is defined in the protocol by the RADICALS Radiotherapy Subgroup. It will use standard techniques and the dose-fractionation schedules will be 66 Gy in 33 fractions over 6.5 weeks or 52.5Gy in 20 fractions over 4 weeks. For more details refer to [Section 6.1](#).

**Figure 1: RADICALS-RT**

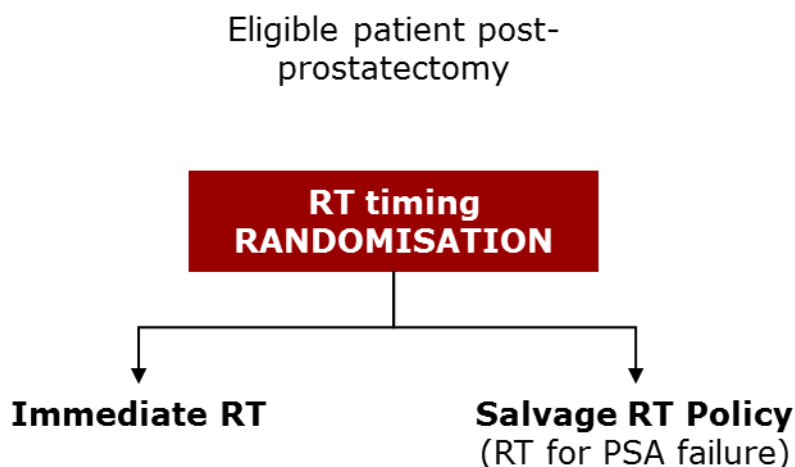

### RADICALS-HD: HORMONE DURATION RANDOMISATION

See [Figure 2](#)

- No hormone therapy with RT
- Short-term hormone therapy (6 months) commencing shortly before RT
- Long-term hormone therapy (24 months) commencing shortly before RT

Hormone therapy may be either LHRH agonist or bicalutamide 150mg daily. For more details refer to [Section 6.2](#). For Canadian patients, hormonal therapy will consist of LHRH analogue therapy (in addition to antiandrogen for tumour flare, if desired) as bicalutamide monotherapy is not approved for use in Canada.

It is preferable to randomise patients between all three arms in RADICALS-HD but it is permissible to randomise patients between two of the three arms (see [Figure 3](#)). Patients can be randomised between:

- RT + no hormone therapy vs RT + 6m hormone therapy vs RT + 24m hormone therapy
- RT + no hormone therapy vs RT + 6m hormone therapy
- RT + 6m hormone therapy vs RT + 24m hormone therapy

**Figure 2: Hormone Duration Randomisation**

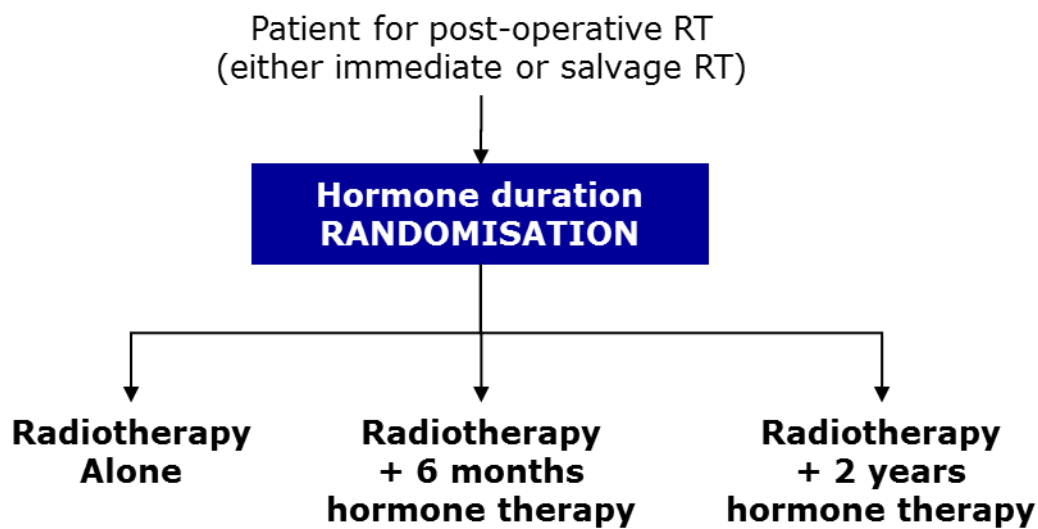



**Figure 3: Two- and three-arm Hormone Duration Randomisations**

Three-arm randomisation  
(preferable)

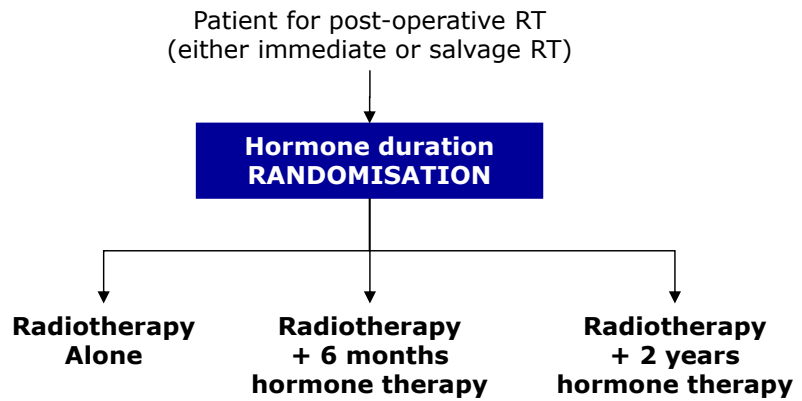

Two-arm randomisation  
(none vs \_short)

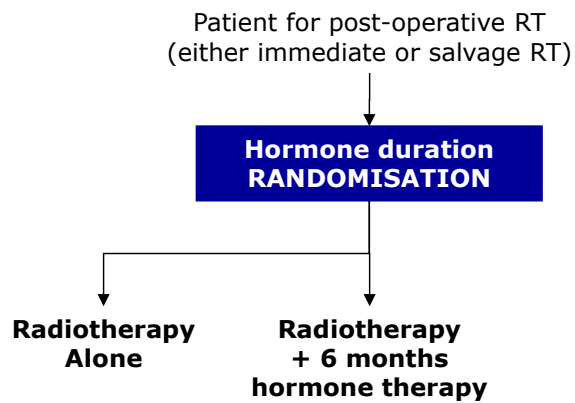

Two-arm randomisation  
(short vs long)

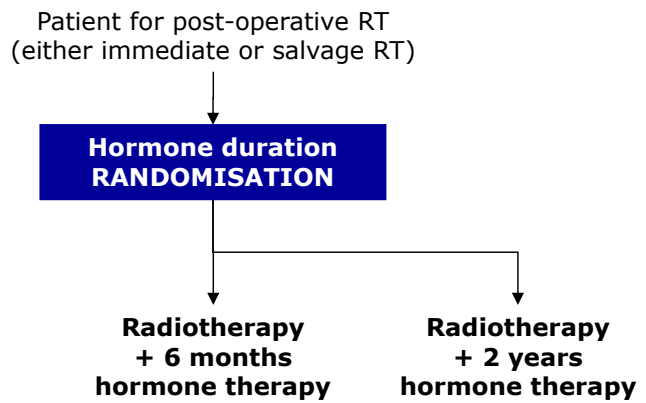

## OUTCOME MEASURES

### RADICALS-RT

**Primary:** Freedom from distant metastasis (any distant metastasis or prostate cancer death)

**Secondary:** Disease-specific survival (i.e. death due to prostate cancer)  
Freedom from treatment failure  
Clinical progression-free survival  
Overall survival  
Non-protocol hormone therapy  
Treatment toxicity  
Patient reported outcomes  
Freedom from biochemical progression

### Artistic Meta-analysis of RADICALS-RT

The proposed outcomes of interest for the ARTISTIC meta-analysis (see also sections 2.5.1 and 9.6.1) are as follows:

Event free survival  
Time to start of salvage hormone therapy  
Time free of metastasis  
Prostate cancer specific survival  
Overall survival

### RADICALS-HD

**Primary:** Metastasis free survival (any distant metastasis or death) - please note the change from disease-specific survival.

**Secondary:** Freedom from distant metastasis  
Freedom from treatment failure  
Clinical progression-free survival  
Overall survival  
Non-protocol hormone therapy  
Treatment toxicity  
Patient reported outcomes

## TRIAL DURATION

The trial was originally planned to address these questions over 12-13 years with 5½ to 6½ years of accrual and around 7 years of further Follow-up. The IDMC has advised that overall event rates have been much lower than anticipated. This prompted a change of primary outcome in the RADICALS-RT comparison (changed in protocol V4.0 from disease-specific survival to freedom from distant metastasis). The IDMC subsequently advised that event rates are lower still (without reference to comparative data by arm).

Following updated projections in 2019, the IDMC and TSC also supported the proposal for the change in primary outcome for RADICALS-HD from disease-specific survival to metastasis free survival, based on the findings from the IcECaP study. This proposal was also approved by the trial funder.

The patient group is men with non-metastatic adenocarcinoma of the prostate who have had a radical prostatectomy. Treatment duration within the trial will range from zero months (i.e. a proportion of patients, maybe 60%, allocated to deferred radiotherapy will never need it) to 24 months (for patients allocated long-term hormone therapy). Follow-up is required every 4 months for 2 years, every 6 months from 2 to 5 years and then annually. This broad patient group has a good long-term prognosis and full, long-term Follow-up data are essential to understand the impact of these treatments. For more details refer to [Section 7.1](#).

## ANCILLARY STUDIES/SUBSTUDIES

Patient reported outcomes will be collected to assess sexual function, urinary function, bowel function and general quality of life throughout the course of the trial. For more details refer to [Section 13.1](#).

Health economics will be assessed by patient reported questionnaire. For more details refer to [Section 13.2](#).

The trial is planned to collect prostatectomy specimens for future translational studies in order to identify and validate novel biomarkers of disease recurrence. For more details refer to [Section 13.3](#). The protocol will be amended appropriately to reflect any changes regarding translational studies or a substudy protocol will be developed.

## 1 BACKGROUND

### 1.1 INTRODUCTION

Prostate cancer is the commonest cancer in UK men, with an incidence in 2008 of 37,000 cases (1). Radical prostatectomy is a standard of care for men presenting with localised disease. Conventional practice following surgery has been observation, with additional treatment, such as radiotherapy (RT) or hormone therapy (HT), used in the salvage setting for those who develop recurrent disease. The routine use of post-operative adjuvant therapy has shown benefits for other cancer types, such as breast and colorectal cancer, and is sometimes used in prostate cancer, but has not been well studied. Large randomised trials are needed to evaluate the role of adjuvant therapy following radical prostatectomy.

### 1.2 RATIONALE AND OBJECTIVES

Radical prostatectomy is a common operation. Hospital Episodes Statistics report 4,904 such operations were performed in England in 2010 (2). This is a significant under-estimate because it excludes operations performed outside the NHS. If rates of PSA testing in the UK continue to increase (3), then both the incidence of diagnosed prostate cancer, and the proportion of patients presenting with localised disease, will also rise. Thus, the number of radical prostatectomies performed each year in the UK is set to increase. According to the Institute for Clinical Evaluative Sciences, the number of radical prostatectomies per year in Canada is estimated to be between 5000 and 7000 (4).

Although the number of radical prostatectomies being performed is increasing there is considerable uncertainty over the optimal management strategy for patients that have had a prostatectomy. The two main management questions relate to the timing of radiotherapy and the use of hormone therapy in conjunction with post-operative radiotherapy (5-7). RADICALS will address both of these questions.

### 1.3 THE CASE FOR A TRIAL OF IMMEDIATE VERSUS EARLY SALVAGE TREATMENT AFTER RADICAL PROSTATECTOMY

There are three randomised controlled trials of adjuvant radiotherapy to the prostate bed published to date. EORTC 22911 recruited 1005 patients with pT3 disease post-radical prostatectomy, who were randomised between observation and adjuvant RT (8-9). A statistically significant advantage was seen for adjuvant radiotherapy in terms of biochemical progression-free survival (hazard ratio (HR) 0.49, 95.3% CI 0.41 – 0.59;  $p < 0.0001$ ) with 61% and 41% event-free at 10 years. An advantage was also reported for adjuvant radiotherapy in terms of clinical progression-free survival (HR 0.81, 95% CI 0.65 – 1.01;  $p = 0.054$ ) with 70.3% and 64.8% PFS event-free at 10 years. However, there was no evidence of a difference in overall survival ( $p > 0.1$ ) with 10-year survival rates of 76.9% with adjuvant RT and 80.7% with observation.

The second randomised controlled trial, SWOG 8794 (CCTG PR-2) had a similar design: 425 men with pT3 disease were randomised to either observation or adjuvant radiotherapy to the prostate bed, with median follow-up at the time of analysis of 10.6 years (10). Once again, adjuvant radiotherapy was associated with a statistically significant improvement in biochemical control (HR 0.43 95% CI 0.31, 0.58,  $p < 0.001$ ). At 15 years, there was a statistically significant advantage for adjuvant radiotherapy for metastasis-free survival (HR 0.74 95% CI 0.57, 1.00,  $p = 0.053$ ), and overall survival.

The third trial, the German Radiotherapy Group trial ARO 96-02, randomised 307 men with pT3 disease to either observation or adjuvant RT to the prostate bed (11). We note that 20% of patients never received their allocated RT. At a median follow-up of 3.3 years, analysis by treatment received, rather than by intention to treat, found that adjuvant radiotherapy was associated with improved biochemical control (81% vs 60% event-free at 4 years, HR 0.4,  $p < 0.0001$ ). These early results are consistent with those of EORTC 22911 and SWOG 8794, but ARO 96-02 was not sufficiently powered to address the effect of adjuvant treatment on clinical outcomes such as survival.

Standard practice following radical prostatectomy has evolved since the SWOG 8794 and EORTC 22911 trials were designed in the mid-1980s. In particular, the routine use of sensitive PSA assays means that contemporary patients with an undetectable post-operative PSA level have a lower risk of relapse than in the past and so less scope to benefit from adjuvant treatment. In addition, post-operative biochemical relapse can be detected earlier than clinical relapse was previously, and early detection may lead to an improvement in the efficacy of salvage RT. For both of these reasons, the benefits seen for adjuvant RT in SWOG 8794 and EORTC 22911 should not lead to the general acceptance of treatment in the adjuvant setting. Instead, the results provide a strong rationale for a comparison between adjuvant treatment and the current standard of care, which is observation with early salvage treatment for biochemical failure.

There is no consensus among UK oncologists on whether to use adjuvant or early selective salvage radiotherapy. A survey of 49 UK urological oncologists found that 25 (51%) did, and 24 (49%) did not recommend adjuvant RT for pT3 margin-positive cases (12). In a second survey of 188 UK Oncologists and Urologists there was widespread uncertainty regarding the use both of adjuvant radiotherapy and the mode, timing and duration of hormone therapy (13). This finding highlights the need for randomised studies addressing this issue. In designing the RADICALS trial, another survey was completed by 102 UK and Canadian urologists and oncologists. The responses reported clinicians offering adjuvant radiotherapy to between 0% and 30% of their post-operative patients with a median offering adjuvant radiotherapy to 3% of post-operative patients.

#### **1.4 THE CASE FOR A TRIAL OF HORMONE THERAPY DURATION IN MEN RECEIVING RADIOTHERAPY POST-PROSTATECTOMY**

Several randomised trials have demonstrated that the addition of hormone therapy improves overall survival in men receiving primary radiotherapy for prostate cancer e.g. EORTC 22863 (14), RTOG 86-10 (15), RTOG 85-31 (16), and a trial from Boston (17). However, until recently there were no reported randomised controlled trials addressing the role of hormone therapy in men receiving post-operative radiotherapy.

Three retrospective non-randomised studies have compared the outcome of salvage RT alone versus salvage RT plus short-term (4-6 months) hormone therapy, and have observed improved biochemical control rates with the addition of hormone therapy (18-20).

In 2010, the first results from a randomised trial in this setting, RTOG 96-01, were presented at the ASTRO annual conference (21). The trial recruited 771 patients with PSA failure after radical prostatectomy and randomised them between early salvage RT alone versus early salvage RT plus 2 years of hormone therapy with bicalutamide 150mg daily, with overall survival as the main outcome measure. The overall survival data are immature, but an advantage for adjuvant bicalutamide was reported in terms of freedom from distant metastasis at 7 years (93% vs 87%,  $p < 0.04$ ). The RTOG 96-01 trial (21) does not provide information on the use of short-term hormone therapy.

A further trial, RTOG 85-31 randomised patients with locally advanced prostate cancer between RT alone versus RT plus long-term hormone therapy. Just 139 of the 977 patients in this trial had

previously had a radical prostatectomy, and there are no published data concerning the outcome of this subgroup (16;22).

The Early Prostate Cancer (EPC) Program accrued 4400 men who had radical prostatectomy and were randomised between observation versus 2 years adjuvant bicalutamide 150 mg. At a median follow-up of 7.4 years, there was no evidence of a difference in overall survival, but the data remain immature in this predominantly low-risk population. This very large trial serves to underline that at present there is no proven role for adjuvant hormone therapy alone after radical prostatectomy (23-24). It is important to note that this trial will not answer the questions RADICALS is posing, since the indications for post-operative radiotherapy were not specified, and because salvage treatment was delayed until clinical (rather than biochemical) progression was observed.

A small trial of adjuvant hormone therapy in men with pathologically involved pelvic lymph nodes, EST-3886, was stopped after 98 patients had been accrued because an overall survival advantage for adjuvant treatment was observed (25-26).

One question that has received little or no attention to date is that of the optimum duration of hormone therapy in patients receiving post-operative radiotherapy to the prostate bed. The surveys of UK urological and oncological opinion (12-13), mentioned above, found that the use of hormone therapy was variable, with most urologists recommending radiotherapy alone. Only 35% of urologists and 34% of oncologists were using hormone therapy in combination with radiotherapy. Among those oncologists who used hormone therapy in combination with post-operative RT, short-term hormone therapy (defined as 3 to 12 months) was recommended by 31% of respondents, long-term hormone therapy (defined as >12 months) by 25%, while the remaining 44% used both short-term and long-term hormone therapy depending on the characteristics of the patient. Similarly, in the survey conducted in planning the RADICALS trial, respondents were using none, short-term and long-term hormone therapy for a median (quartiles) of 50% (0%, 90%), 0% (0%, 50%) and 10% (0%, 33%) of their patients receiving adjuvant post-operative radiotherapy and 50% (0%, 90%), 13% (0%, 50%) and 5% (0%, 30%) of their patients receiving salvage post-operative radiotherapy i.e. there is significant variation in clinical practice.

In the context of primary (i.e. not post-operative) RT for prostate cancer, the appropriate duration of hormone therapy was addressed by RTOG 92-02 (27), which randomised 1554 men receiving RT for locally advanced disease between short-term hormone therapy (4 months) and long-term hormone therapy (28 months). Long-term hormone therapy was associated with improved 5-year cause-specific survival (95% vs 91%,  $p=0.006$ ), with no evidence to date of a significant difference in overall survival at 5 years (80% vs 79%,  $p=0.73$ ). Similarly, results were reported from TROG 96-01, the largest randomised trial to date addressing the role of neoadjuvant androgen deprivation prior to RT in predominantly high risk non-metastatic disease (28). The use of 6 months neoadjuvant androgen deprivation reduced the risk of distant progression (HR 0.49, 95% CI 0.31-0.76,  $p=0.001$ ) and death from any cause (HR 0.63, 95% CI 0.48-0.83,  $p=0.0008$ ). The use of 3 months neoadjuvant androgen deprivation did not provide good evidence of a benefit.

The current pattern of UK practice, with no consensus regarding the need for, or duration of, hormone therapy in men receiving post-operative RT, combined with the increasing popularity of radical prostatectomy, provides a strong rationale for a phase III study. RADICALS-HD will investigate the question of RT alone versus RT plus short-term hormone therapy versus RT plus long-term hormone therapy in this setting. The duration of short-term hormone therapy will be 6 months, based on TROG 96-01 (28), and long-term hormone therapy will be for 2 years, based on RTOG 92-02 (27) and RTOG 96-01 (21). Long-term results from RTOG 96-01 were presented at conferences in 2010 and showed favourable outcomes for 2 years ADT over no ADT.

## 1.5 OTHER ONGOING RELEVANT STUDIES AND TRIALS

### 1.5.1 RADICALS-RT

There are two other trials asking complementary questions to RADICALS-RT which were active in Apr-2011. These are the TROG 08.03 RAVES and FNCLCC-GETUG-17/0702 trial, both of which randomise patients between immediate post-op RT and salvage RT for PSA failure. ADT is not given with RT in RAVES whereas 6m ADT is given with RT in GETUG-17. There are differences between these trials and RADICALS-RT, notably the earlier primary outcome measures, but the primary design is sufficiently complementary that combined analyses are planned for long-term outcome measures. This meta-analysis may be performed prior to the main outcome measure analysis of RADICALS-RT, as detailed in section 9.6. The meta-analysis will be based on up-to-date data from all trials. All RADICALS-RT randomised patients will be included in the analyses, which will be performed on an intention-to-treat basis. The meta-analysis will be conducted in stages, as data for each outcome matures, with analyses being carried out when reasonable power to detect treatment differences is achieved. Relevant information, for example accrual and follow-up durations, control arm event rates and patient retention rates, will be sought from each study to finalise the appropriate time point for the analysis of each outcome. Full details will be documented in the ARTISTIC protocol and statistical analysis plan.

### 1.5.2 RADICALS-HD

There are also complementary trials to RADICALS-HD. The EORTC 22043-30041 trial of adjuvant treatment after radical prostatectomy randomises patients between adjuvant radiotherapy alone versus adjuvant radiotherapy plus 12 months of hormone therapy. Combined analyses are planned in the future.

In the early salvage setting, the FNCLCC-GETUG-16/0504 trial compares RT alone versus RT plus 6 months ADT, and the RTOG 05-34 SPPORT trial compares early salvage RT to the prostate bed alone against supplementing this with 4 to 6 months ADT or 4 to 6 months ADT and pelvic RT.

In addition to the trials listed above, it is also pertinent to consider RTOG P-0011, which was originally designed as a 3-arm trial in men at high risk of recurrence following radical prostatectomy, with the randomisation between adjuvant RT, long-term adjuvant hormone therapy (24 months) or RT plus long-term hormone therapy. The trial was modified to a 2-arm trial comparing adjuvant RT +/- hormone therapy to improve recruitment although the trial closed early. The current UK standard of care, namely observation with salvage treatment in the event of PSA failure, was not included in the trial. Similarly, a German study known as AP 26/99 and ARO 00/01 planned to randomise around 900 patients with isolated PSA relapse to early salvage radiotherapy with or without short-term HT (6 months) (29). The trial closed in 2003 because of poor accrual.

Completion of recruitment to RADICALS will be facilitated in the UK by favourable attitudes of UK urologists towards radiotherapy, the centralisation of radical prostate cancer surgery in Cancer Centres, the established multidisciplinary team pattern of working, and the NCRN infrastructure.

### 1.5.3 OTHER TRIALS

In addition to the above trials which have completed recruitment of patients, we note that the Japanese Clinical Oncology Group are running a trial (JCOG 0401) for patients with isolated PSA failure after prostatectomy where patients are randomised to radiotherapy with hormone therapy or hormone therapy alone (30). The target is 200 patients. This trial does not address the key question of the timing of post-operative radiotherapy.

## **1.6 RISKS AND BENEFITS**

The treatments described in this protocol reflect additional treatment given after surgery. Each of the management strategies tested in RADICALS are familiar in clinical practice, therefore the potential adverse effects, risks, hazards and benefits are similar to those which would be experienced in standard practice. It is intended that RADICALS can define the most appropriate strategy for this group of patients, addressing the balance of benefits against risks.

## **1.7 CONCLUSIONS**

In summary, the three existing phase III trials of adjuvant RT against observation listed above (8-11) will be of very limited value in practice, either because they have been superseded by clinical developments or because they are too small. The paucity of randomised trials addressing the optimum duration of hormone therapy in the post-operative setting is an important omission. The popularity of radical prostatectomy, together with current oncological and urological opinion in the UK, Canada and elsewhere, presents an opportunity for a large, randomised trial addressing both the timing of post-operative treatment (early versus deferred) and the duration of hormone therapy (none versus short-term versus long-term) used in addition to prostate bed RT.



### 3 SELECTION OF CENTRES AND CLINICIANS

In order to participate in RADICALS, investigators and centres must be registered with one of the participating groups and must fulfil a set of basic criteria.

#### Each investigator must:

- Regularly undertake treatment of prostate cancer
- Have appropriate experience of conducting trials according to the principles of Good Clinical Practice (GCP)
- Comply with protocol treatment and follow-up schedule
- Maintain a local Trial Master File which will contain essential documents for the conduct of the trial
  
- Submit all trial data in a timely manner and as described in the protocol. Individual centres may be suspended on the recommendation of the Trial Management Group (TMG) if data returns are poor or if trial conduct is violated in other ways
- Notify the trials unit immediately of all Serious Adverse Events (SAEs). The initial SAE report must be promptly followed by detailed written reports
- Comply with Radiotherapy Quality Assurance
- Not disclose any trial data without the approval of the Trial Steering Committee (TSC)
- Retain all trial related documents for 15 years after completion of the trial

#### Each centre must:

- Conduct the trial in compliance with the principles of GCP and applicable regulatory requirements
- Have an adequate number of qualified staff and adequate facilities, for the foreseen duration of the trial, to conduct the trial properly and safely
- Must ensure that all staff assisting with the trial are adequately informed about the protocol and their trial related duties
- Obtain necessary local approvals
- Allow on-site monitoring
- Have PSA test with an assay sensitivity of 0.1ng/ml or lower

For information about additional site registration criteria, trial documentation and local procedures, see local [Appendix B](#).

## 2 SELECTION OF PATIENTS

Patients with non-metastatic adenocarcinoma of the prostate who have had a radical prostatectomy will be eligible for RADICALS. **All patients must fulfil the main entry criteria and the criteria relevant to the randomisation they are taking part in.** Patients who are taking part in RADICALS-RT can also take part in RADICALS-HD when they have radiotherapy. Complete inclusion and exclusion criteria are listed in [Table 1](#).

**Table 1: Patient inclusion and exclusion criteria**

| TRIAL SECTION | INCLUSION                                                                                                                                                                                                                                                                                                                                                                                                                                            | EXCLUSION                                                                                                                                                                                                                                                                                                                                                                                                                                              |
|---------------|------------------------------------------------------------------------------------------------------------------------------------------------------------------------------------------------------------------------------------------------------------------------------------------------------------------------------------------------------------------------------------------------------------------------------------------------------|--------------------------------------------------------------------------------------------------------------------------------------------------------------------------------------------------------------------------------------------------------------------------------------------------------------------------------------------------------------------------------------------------------------------------------------------------------|
| All Patients  | <ul style="list-style-type: none"> <li>• Patient has undergone radical prostatectomy</li> <li>• Prostatic adenocarcinoma</li> <li>• Written informed consent</li> </ul>                                                                                                                                                                                                                                                                              | <ul style="list-style-type: none"> <li>• Bilateral orchidectomy</li> <li>• Prior pelvic RT</li> <li>• Other active malignancy likely to interfere with protocol treatment or follow-up</li> <li>• Known distant metastases from prostate cancer</li> <li>• Pre-operative hormone therapy within previous 6 months</li> <li>• Previous pre-operative hormone therapy for longer than 8 months</li> <li>• Any post-operative hormone therapy*</li> </ul> |
| RADICALS-RT   | <ul style="list-style-type: none"> <li>• Post-operative PSA <math>\leq 0.2</math>ng/ml</li> <li>• Ideally more than 4 weeks and less than 22 weeks after radical prostatectomy<sup>#</sup></li> <li>• One or more of:               <ul style="list-style-type: none"> <li>:: pT3/4</li> <li>:: Gleason 7-10 (biopsy or surgical sample)</li> <li>:: Pre-operative PSA <math>\geq 10</math>ng/ml</li> <li>:: Positive margins</li> </ul> </li> </ul> | <ul style="list-style-type: none"> <li>• Post-operative biochemical failure, defined as EITHER               <ul style="list-style-type: none"> <li>:: two consecutive rises in PSA and final PSA <math>&gt; 0.1</math>ng/ml OR</li> <li>:: three consecutive rises in PSA</li> </ul> </li> <li>• Ideally more than 22 weeks since radical prostatectomy<sup>#</sup></li> </ul>                                                                        |
| RADICALS-HD   | <ul style="list-style-type: none"> <li>• Patient due to receive post-operative RT (early or deferred)</li> </ul>                                                                                                                                                                                                                                                                                                                                     | <ul style="list-style-type: none"> <li>• PSA <math>&gt; 5</math>ng/ml at the time of randomisation</li> </ul>                                                                                                                                                                                                                                                                                                                                          |

<sup>#</sup>Patients randomised to early RT ideally should start trial treatment within 26 weeks after radical prostatectomy

\*Patients joining only the 6 months vs 2 years comparison in RADICALS-HD may begin post-operative hormone therapy prior to randomisation. However, this **MUST** be discussed with trials office before randomisation in this circumstance.

## 2.1 INVESTIGATIONS PRIOR TO EACH RANDOMISATION

All patients must have the following tests prior to randomisation according to the timings in the table below.

**Table 2: Timing of Investigations**

| COMPARISON  | TEST       | TIMING                                                                         |
|-------------|------------|--------------------------------------------------------------------------------|
| RADICALS-RT | Bone scan* | 16 weeks prior to randomisation                                                |
|             | PSA**      | Within 30 days prior to randomisation<br>AND<br>At least 30 days after surgery |
| RADICALS-HD | Bone scan# | 16 weeks prior to randomisation                                                |
|             | PSA**      | Within 30 days prior to randomisation<br>AND<br>At least 30 days after surgery |

\* Bone scan only required if Gleason score  $\geq 8$  and post-operative PSA is detectable. Additional investigations are at the clinician's discretion.

\*\* PSA assay must have a sensitivity of 0.1ng/ml or lower

# Bone scan only required if PSA>2. Additional investigations are at the clinician's discretion.

## 3 RANDOMISATION & ENROLMENT

### 3.1 TRIAL RANDOMISATION OPTIONS

RADICALS is an international, multi-centre, open-labelled, randomised controlled trial. Blinding of treatment allocation in the trial is impracticable and will not be used. RADICALS is a trial with two separate randomisations.

#### 3.1.1 RADICALS-RT: RADIOTHERAPY TIMING RANDOMISATION

This randomisation, ideally performed within 22 weeks after radical prostatectomy (RP), is defined as '**Radiotherapy Timing Randomisation**'. If the patient meets the eligibility criteria (see **Table 1** in **Section 4** and **Appendix A V**), he may be randomised between early radiotherapy and deferred radiotherapy for PSA failure.

#### 3.1.2 RADICALS-HD: HORMONE DURATION RANDOMISATION

This randomisation, normally performed before the administration of post-operative radiotherapy, is defined as '**Hormone Duration Randomisation**'. This means that for patients receiving deferred RT, enrolment to RADICALS-HD may take place months or years after radical prostatectomy (see **Figures 1-3**). Patients entering into this randomisation may have already been in RADICALS-RT or not. Prior to their radiotherapy, patients may be randomised between the following 3 arms: no hormone therapy, short-term hormone therapy and long term hormone therapy. All patients taking part in RADICALS-HD may elect to be randomised between two, rather than all three, arms to facilitate comparisons and trial recruitment.

### 3.2 RANDOMISATION CONTACTS

Randomisation to RADICALS-RT closed in June 2015, randomisation for RADICALS-HD closed in December 2016.

### 3.3 CO-ENROLMENT GUIDELINES

Co-enrolment to other trials is permitted, providing this does not interfere with assessment of RADICALS outcome measures. See **Section 6.7** for further detail.

## 4 TREATMENT OF PATIENTS

### 4.1 GUIDANCE FOR RADICALS-RT

Patients in RADICALS-RT will be allocated to either early post-operative RT or deferred RT. RT will be given as 66Gy in 33 fractions over 6.5 weeks or 52.5Gy in 20 fractions over 4 weeks. Treatment with radiotherapy (or hormone treatment – see [Section 6.2](#)) will commence within 2 months after the randomisation for early RT patients or within 2 months after biochemical failure for deferred RT patients. For information on radiotherapy quality assurance see [Section 10.2](#).

If radiotherapy centres wish to use IMRT, they may do so with the exception of Canadian centres who will need to be credentialed for IMRT before they can use it for their RADICALS patients (full details are available in the Canadian Appendix). The prostate bed dose should be 66Gy in 2Gy fractions or 52.5Gy in 20 fractions. However, if it is intended to use IMRT to treat the pelvic lymph nodes in addition to the prostate bed, then treatment should be given over 33 fractions to a total nodal dose of 52-54Gy. Alternative schedules should be agreed with the RADICALS Trial Management Group.

#### 4.1.1 EARLY POST-OP RADIOTHERAPY

Patients allocated to early radiotherapy to the prostate bed will start treatment within approximately 2 months of entering into RADICALS-RT and ideally within 26 weeks after surgery. Radiotherapy will be according to guidelines given in [Section 6.1.3](#). Patients allocated early post-operative radiotherapy can also enter RADICALS-HD if they wish: this is encouraged. Alternatively, the use of hormones can be decided by the responsible investigator. Radiotherapy will be delayed by 2 months, up to 8 months after surgery, if the patient is due to receive hormone therapy.

#### 4.1.2 DEFERRED RADIOTHERAPY

This is a monitoring policy, with deferred RT to prostate bed given in the event of biochemical failure. PSA will be tested at each follow-up visit (see [Section 7](#)) and more often if rising PSA is detected. Biochemical failure is defined as EITHER two consecutive rising PSA levels and a PSA of greater than 0.1 ng/ml OR three consecutive rising PSA levels. If post-operative biochemical failure is confirmed, patients will receive radiotherapy as described in [Section 6.1.3](#) and should be offered entry to the RADICALS-HD; this is encouraged. Radiotherapy will be delayed by 2 months if the patient is due to receive hormone therapy.

#### 4.1.3 RADIOTHERAPY TECHNIQUE

##### 4.1.3.A RADIATION THERAPY

Radiotherapy to start within approximately 2 months of randomisation. Treatment should be CT planned with the patient supine, with empty rectum and comfortably full bladder. Recommended doses are in [Section 6.1.3.D](#).

##### 4.1.3.B PHYSICAL FACTORS

Megavoltage equipment is required with effective photon energies >6MV. Minimum source-to-axis distance is 100cm. The treatment technique will typically be by a 3-field or 4-field coplanar technique with blocks or multi-leaf collimation (MLC) leaf positions designed for all fields to protect uninvolved structures. Intensity-Modulated Radiation Therapy (IMRT) techniques may be used, subject to the RADICALS Radiotherapy Quality Assurance (RTQA) reviewers' approval.

##### 4.1.3.C TREATMENT VOLUMES GUIDANCE

Please note that the following treatment volumes are for guidance only.

#### [A] PROSTATE BED

**Clinical Target Volume (CTV).** The CTV will include the prostate bed in all patients. The pelvic lymph node regions may also be included at the investigator's discretion. Information which may be used to define the prostate bed CTV include:

- i. Histopathologic information of prostate size and tumour extent to specific boundaries of the surgical resection
- ii. Pre-operative imaging e.g. pelvic CT/MRI studies
- iii. Post-operative anatomy on planning CT scan

The definition of the prostate bed CTV is based on the estimated location of the pre-operative prostate volume plus sites of possible microscopic tumour extension, plus the extent of the surgical bed, and should normally include any surgical clips provided that the normal-tissue dose-constraints are satisfied. The original volume of seminal vesicles (including any residual seminal vesicle tissue post-op) will not be considered target if they were not pathologically involved with tumour, and if the predicted pre-operative risk of seminal vesicle involvement was less than 15% using the Roach formula (% seminal vesicle (SV) involvement risk =  $PSA + 10 \times [GS - 6]$  where GS=Gleason Score. If there was pathologic involvement of the seminal vesicles, or if the predicted risk of involvement was greater than 15%, then the seminal vesicles will be considered target.

:: **Low-risk** = <15% according to the Roach formula

:: **High-risk** = ≥15% according to the Roach formula

**Inferior border:** 5mm cranial to the superior border of the penile bulb

**Anterior border:** As follows:

- i. Caudal (less than 2cm above anastomosis) – posterior aspect of symphysis pubis
- ii. Cranial (more than 2cm above anastomosis) – posterior 1/3 of bladder wall

**Posterior border:** Anterior rectal wall

**Lateral border:** Medial border of obturator internus and levator ani muscles

**Superior border:** As follows:

- i. If SV low-risk and pathologically uninvolved: base of SV
- ii. If SV high risk or pathologically involved: tips of SV
- iii. If SV absent, the superior border should be determined with reference to the estimated position of the pre-operative SV using the longitudinal dimension superiorly from urogenital diaphragm to reflect preoperative size of prostate, together with the position of any surgical clips.

**Prostate bed – Planning Target Volume:** The planning target volume (PTV) will add 1.0 cm in all directions, for day-to-day variation in set up and for CTV motion.

**Prostate bed – Field size:** The maximum unshaped field size in each axis (anterior/posterior (AP), left/right (LR) and superior/inferior (SI)) will typically be between 8.0 and 12.0cm.

#### [B] PELVIC LYMPH NODES

**Clinical Target Volume:** The CTV will include the prostate bed in all patients. The pelvic lymph node regions may also be included at the investigator's discretion. The pelvic nodal

CTV will include the internal iliac/obturator, external iliac, pre-sacral and pre-sciatic nodal regions.

**Pelvic lymph nodes – Planning Target Volume:**

- Inferior border: inferior border of prostate bed PTV
- Lateral borders: pelvic sidewalls
- Anterior border: posterior symphysis
- Posterior border: anterior S2-3 junction
- Superior border: lower 1/3 sacro-iliac (S-I) joints

**Pelvic lymph nodes – field borders:**

Determined by PTV above. Conformal blocks/MLC leaves may be used to shield inferior part of rectum and anus, the base of the penis, and the antero-superior part of the bladder.

**4.1.3.D RADIATION DOSES**

**(A) PROSTATE BED**

Radiotherapy will be given once a day, five sessions a week. The dose shall be prescribed at the intersection of the central rays of the beams. The prescribed dose to the intersection of the central rays of the beams is recommended to be one of the following:

- 66Gy given in 33 fractions over 6.5 weeks
- 52.5Gy given in 20 fractions over 4 weeks

Other schedules should be discussed and approved by the TMG. The minimal dose to the PTV shall not be less than 95% of the prescribed dose; the maximum, not more than 105% of the prescribed dose.

**(B) PELVIC LYMPH NODES**

Radiotherapy will be given once a day, five sessions a week. The dose shall be prescribed at the intersection of the central rays of the beams. The prescribed doses to the intersection of the central rays of the beams will be:

- 46Gy given in 23 fractions over 4.5 weeks

#### 4.1.3.E CRITICAL NORMAL STRUCTURES

The dose-volume objectives are provided in [Tables 3 and 4](#). These are for guidance only.

**Table 3: Dose & Volume Objective: Daily fractions of 2 Gy**

| STRUCTURE | DOSE  | VOLUME OBJECTIVE |
|-----------|-------|------------------|
| Bladder   | 50 Gy | < 80%            |
|           | 60 Gy | < 50%            |
| Rectum    | 30 Gy | < 80%            |
|           | 40 Gy | < 70%            |
|           | 50 Gy | < 60%            |
|           | 60 Gy | < 50%            |
|           | 66 Gy | < 30%            |

**Table 4: Dose & Volume Objective: 52.5Gy in 20 fractions over 4wks**

| STRUCTURE | ISODOSE | VOLUME OBJECTIVE |
|-----------|---------|------------------|
| Bladder   | 40 Gy   | < 80%            |
|           | 48 Gy   | < 50%            |
| Rectum    | 24 Gy   | < 80%            |
|           | 32 Gy   | < 70%            |
|           | 40 Gy   | < 60%            |
|           | 48 Gy   | < 50%            |
|           | 52.5 Gy | < 30%            |

## 4.2 GUIDANCE FOR RADICALS-HD

### 4.2.1 RT ALONE

Patient would be treated with post-operative radiotherapy alone as described in [Section 6.1](#). Radiotherapy should ideally start as soon as possible but within 2 months after randomisation.



#### 4.2.2 SHORT-TERM HORMONE THERAPY PLUS RT

Trial treatment should ideally start as soon as possible but within 2 months after randomisation. Radiotherapy should commence approximately 2 months after starting hormone treatment. Treatment using a gonadotrophin releasing hormone analogue (GnRHa) should be given for 6 months. Because of the possibility of tumour 'flare', an anti-androgen (such as cyproterone acetate 100mg tds) should be used for one week prior to the first GnRHa administration, and continued for a total of 3 weeks. The choice of GnRHa may vary according to local practice (e.g. goserelin, leuprorelin), but in this arm the use of 3-month depot preparations should be avoided. Where possible, one month preparations (e.g. goserelin 3.6mg, leuprorelin 3.75mg) should be used in order to hasten testosterone recovery after the treatment period. Bicalutamide monotherapy 150mg daily or degarelix each for 6 months are acceptable alternatives. For Canadian patients, hormonal therapy will consist of LHRH analogue therapy (in addition to antiandrogen for tumour flare, if desired) because bicalutamide monotherapy is not approved for use.

##### 4.2.2.A DISPENSING HORMONE THERAPY

Centres will use routinely available products (either LHRH agonists or bicalutamide monotherapy) that will be stored and dispensed in the usual way. For Canadian patients, hormonal therapy will consist of LHRH analogue therapy (in addition to antiandrogen for tumour flare, if desired) because bicalutamide monotherapy is not approved for use.

##### 4.2.2.B LONG-TERM HORMONE THERAPY PLUS RT

Trial treatment should ideally start as soon as possible but within 2 months after randomisation. Radiotherapy should commence approximately 2 months after starting hormone treatment. Treatment using a gonadotrophin releasing hormone analogue (GnRHa) should be given for 24 months. Because of the possibility of tumour 'flare', an anti-androgen (such as cyproterone acetate 100mg tds) should be used for one week prior to the first GnRHa administration, and continued for a total of 3 weeks. The choice of GnRHa may vary according to local practice (e.g. goserelin, leuprorelin). In this arm, the use of 3-month depot preparations (e.g. goserelin 10.8mg, leuprorelin 11.25mg) is encouraged in the interests of patient convenience, but 1 month or 2 month depots are acceptable. Bicalutamide monotherapy 150mg daily, or degarelix, for 24 months are acceptable alternatives. In the case of bicalutamide, patients should be considered for prophylactic radiotherapy to bilateral breast buds (8Gy single fraction using orthovoltage radiation) to prevent painful gynaecomastia. For Canadian patients, hormonal therapy will consist of LHRH analogue therapy (in addition to antiandrogen for tumour flare, if desired) because bicalutamide monotherapy is not approved for use.

##### 4.2.2.C DISPENSING HORMONE THERAPY:

Centres will use routinely available products (either LHRH agonists or bicalutamide monotherapy) that will be stored and dispensed in the usual way. For Canadian patients, hormonal therapy will consist of LHRH analogue therapy (in addition to antiandrogen for tumour flare, if desired) because bicalutamide monotherapy is not approved for use.

#### 4.3 PROTOCOL TREATMENT DISCONTINUATION

In consenting to the trial, patients are consenting to trial treatment, trial follow-up and data collection. However, an individual patient may stop treatment early for any of the following reasons:

- Disease Progression
- Unacceptable toxicity or adverse event
- Intercurrent illness that prevents further treatment

- Any change in the patient's condition that justifies the discontinuation of treatment in the clinician's opinion
- Inadequate compliance with the protocol treatment in the judgement of the treating physician
- Withdrawal of consent for treatment by the patient

As the patient's participation in the trial is entirely voluntary, they may choose to discontinue the trial treatment at any time without penalty or loss of benefits to which they are otherwise entitled. Although the patient is not required to give a reason for discontinuing their trial treatment, a reasonable effort should be made to establish this reason while fully respecting the patient's rights.

Patients should remain in the trial for the purpose of follow-up and data analysis (unless the patient withdraws their consent for this). If a patient is withdrawn from follow-up, refer to [Section 6.5](#).

#### 4.4 ACCOUNTABILITY AND UNUSED DRUGS

As all drugs are licensed in the countries in which the trial will be performed, drug accountability measures will not be necessary. Drugs should be obtained as per local practice.

#### 4.5 MEASURES OF COMPLIANCE AND ADHERENCE

Date of treatment, dose, delays and reasons for delays or dose modifications of all study treatment will be recorded on case report forms.

#### 4.6 NON-TRIAL TREATMENT

##### 4.6.1 MEDICATIONS PERMITTED/NOT PERMITTED

No other therapies for other prostate cancer (e.g. bilateral orchidectomy, oestrogens, cytotoxic chemotherapy) are acceptable prior to disease progression. 5-alpha reductase inhibitors, soya, selenium and vitamin E are acceptable non-trial therapies.

##### 4.6.2 DATA ON CONCOMITANT MEDICATION

Concomitant medication relevant to serious adverse events will be recorded on Serious Adverse Event forms.

#### 4.7 CO-ENROLMENT GUIDELINES

Ideally, patients should not be participating in any other clinical trial of prostate cancer treatment when they enter RADICALS. However, there are some planned trials that overlap and fit with RADICALS which patients may join if participation does not interfere with RADICALS or other trials. Similarly, once enrolled, patients should not enter any other trials that will interfere with the RADICALS assessments until the patient has had a treatment failure event reported (see [Section 9.2.2](#)). After this point, the patient may be entered into further studies.

The primary outcome measures of RADICALS are freedom from distant metastasis and disease-specific survival. Therefore, Follow-up to RADICALS must continue and must not be affected by co-enrolment to other studies. It is preferable that the participating group's trials unit should be notified in writing, with details of the trial: trial name, sponsor, randomisation arms, study endpoints and a declaration that RADICALS Follow-up will not be impeded, before a patient is co-enrolled or after randomisation if the patient is already co-enrolled.

## 5 ASSESSMENTS AND FOLLOW-UP

### 5.1 CASE REPORT FORM TIMINGS

Table 5 presents a summary of the timing of the required trial case report forms to be completed by the centre for participating patients.

**Table 5: Summary of timing of case report forms (CRFs)**

| TRIAL CASE REPORT FORMS                                                                       | TIMING FROM RANDOMISATION                                                       |
|-----------------------------------------------------------------------------------------------|---------------------------------------------------------------------------------|
| Baseline Information form (CRF 1a)                                                            | Pre-randomisation                                                               |
| Patient History Form (CRF1b)                                                                  | Pre- or Post-randomisation                                                      |
| Co-morbidity form (CRF 2)                                                                     | Within two weeks prior to randomisation                                         |
| PSA History Log                                                                               | Pre-randomisation                                                               |
| Randomisation forms<br>(CRF 3 = RADICALS-RT and RADICALS-HD )<br>(CRF 4 = RADICALS-HD alone ) | At randomisation                                                                |
| Radiotherapy forms (CRF 5)                                                                    | After administration of radiotherapy                                            |
| Follow-up forms*(CRF 6)                                                                       | Month 4, 8, 12, 16, 20, 24, 30, 36, 42, 48, 54, 60, then annually until year 15 |
| Patient Reported Outcome forms**                                                              | Pre-randomisation, 1, 5 and 10 years                                            |
| Disease Event form (CRF 7)                                                                    | As needed                                                                       |
| Serious adverse event form (CRF 8)                                                            | As needed                                                                       |
| Death Report form (CRF 9)                                                                     | As needed                                                                       |

\*Timed from most recent randomisation

\*\*Patient reported outcomes only reported by patients in RADICALS-RT

### 5.2 PROCEDURES FOR ASSESSING EFFICACY

#### 5.2.1 PSA MEASUREMENTS

PSA will be tested regularly at each follow-up visit and more often if clinically indicated. The assay used must have a sensitivity of 0.1ng/ml or lower.

#### 5.2.2 EFFICACY PARAMETERS

The primary outcome measure is for RADICALS-RT is freedom from distant metastasis. This will be defined as any distant metastasis or death from prostate cancer. Bone scans are not mandated at set times but should be performed as clinically indicated. The primary outcome measure for RADICALS-HD is metastasis free survival, defined as any distant metastasis or death from any cause.

All men should be followed-up for the duration of the trial. With regards to ascertaining causes of death, particular attention will be paid to men who are reported as having died from prostate cancer without previously reporting progression or recurrence, and men who are reported as having died from non-prostate cancer causes after developing hormone refractory disease. There will be a review of causes of death performed independent from allocated trial arm.

### 5.3 PROCEDURES FOR ASSESSING SAFETY

There are no tests in addition to standard practice to assess patient safety. Patients will be seen every 4 months for 2 years, every 6 months from 2 to 5 years, then annually thereafter. Secondary malignancies, toxicities and SAEs will be recorded on CRFs and/or SAE forms which will be monitored by the Independent Data Monitoring Committee (IDMC).

### 5.4 OTHER ASSESSMENTS

#### 5.4.1 PATIENT REPORTED OUTCOMES

Quality of life will be assessed using self-administered questionnaires in the subgroup of patients entered in RADICALS-RT. These questionnaires have approximately 50 questions and are collected pre-randomisation and at 1, 5 and 10 years after randomisation. Further details are given in [Section 13.1](#).

#### 5.4.2 HEALTH ECONOMICS

Data for the health economics substudy will be collected on both CRFs and patient administered questionnaires (EQ-5D). The EQ-5D questionnaire will be completed by the patients together with the patient reported outcome forms at baseline and at 1, 5 and 10 years after randomisation. Further details are given in [Section 13.2](#).

### 5.5 EARLY STOPPING OF FOLLOW-UP

If a patient chooses to discontinue their trial treatment, they should still be followed up providing they are willing; if they do not wish to remain on trial follow-up, however, their decision must be respected and the patient will be withdrawn from the trial completely. The CTU should be informed of this in writing using the appropriate documentation. Patients withdrawing from follow up have a negative impact on a trial's data.

If the medical data collected during the patient's participation in the trial are kept for research and analysis purposes, they can be anonymised if necessary. Consent for future use of stored samples already collected can be refused when leaving the trial early (but this should be discouraged and should follow a discussion).

Patients may change their minds about stopping trial follow-up at any time and re-consent to participation in the trial.

Patients who stop trial follow-up early will not be replaced.

Patients will be followed up in the long-term through usual mechanisms, which may include flagging through national registries.

### 5.6 LOSS TO FOLLOW-UP

Every effort should be made to follow-up all patients who have been randomised. Patients should, if possible, remain under the care of an oncologist or urologist for the duration of the trial. If care of a patient is returned to the primary lead physician, it is the responsibility of the trial investigator who obtained the patient's consent to participate in the trial to ensure that the data collection forms are completed. For participants who stop follow up early, data collected up to the time of withdrawal

from follow up will be kept and included in the analysis unless the participant explicitly withdraws consent for this.

If follow-up visits are no longer possible according to the trial schedule, patients can be followed up by telephone or using information from other healthcare services, e.g. GP practice. These follow-ups should adhere to the timelines specified in the patient's schedule. If information reported on the follow-up CRF is not from a follow-up visit to a RADICALS investigator site please indicate this by completing question 1a on the Follow Up CRF.

Where it applies, the consent of patients should be obtained for their names to be flagged for survival information through national registries, for example NHS Information Centre/Office of National Statistics (ONS) in England/Wales and General Register Office in Scotland, Hospital Episode Statistics (HES). If the clinician moves, appropriate arrangements should be made to arrange for trial follow-up to continue at the centre.

## **5.7 PATIENT TRANSFERS**

For patients moving from the area, every effort should be made for the patient to be followed-up at another participating trial centre and for this trial centre to take over responsibility for the patient. To document the transfer process the main contact person at both the current and receiving hospitals should complete and sign the Patient Transfer Confirmation form. A fully completed form must be returned to the CTU prior to the patient transfer and ideally any data queries for the patient should be completed prior to transfer.

On receipt of the completed transfer form a member of the RADICALS team will confirm the database has been updated and request confirmation of the name of the patient's new Clinician. Photocopies of the following documents may then be sent to the new hospital to complete the transfer and copies must be also retained at the original site for monitoring purposes:

- Consent form
- Completed CRFs
- Any documentation relating to the patient's participation in RADICALS (patient names must be removed from any documentation).

### **5.7.1 MORTALITY DATA FROM ELECTRONIC HEALTH RECORDS**

Death registration data for England and Wales became available to the trial in January 2018, to be updated quarterly thereafter. These will be provided through ONS or an appropriate alternative. This enables regular checking for completeness of the trial database, with specific data chases to sites in the event of unreported deaths becoming known. The data also enables more precise survival estimation, since patients without recent trial follow-up may be assumed to be alive approximately one month before the data extract if death has not been registered. Death registration also enables checking for unreported distant metastases, in the event of a prostate cancer death being registered with ONS but no distant metastases previously recorded in the trial database. Data from other national registers may be used in the future if it becomes available to the trial team.

## **5.8 END OF TRIAL**

All patients will be actively followed according to the trial schedule until end of funding unless the TMG considers appropriate to transition before then to a long-term follow-up stage. During the long-term follow-up stage participants will not be required to make any trial specific visits to the clinic but will be followed-up via retrospective data collection from the sites and national registries for which

consent has been requested as part of the original consent process. During this follow-up period participants will have completed the interventional phase of the study and will not be on any trial mandated regimen so real time SUSAR and SAE reporting will cease but investigators will be asked to report events via national reporting systems such as the MHRA Yellow card system in the UK.

## 6 STATISTICAL CONSIDERATIONS

### 6.1 METHOD OF RANDOMISATION

Randomisation will be performed centrally at the MRC Clinical Trials Unit at UCL using a computer-implemented algorithm. The method of randomisation will be minimisation over a number of clinically important stratification factors with an allocation probability of 80%. Each comparison will have an independent randomisation programme.

### 6.2 OUTCOME MEASURES

RADICALS considers a number of primary and secondary outcome measures; all outcome measures are relevant to both trial randomisations unless otherwise stated. All outcome measures will be timed from the relevant randomisation.

#### 6.2.1 PRIMARY OUTCOME MEASURE - RADICALS-RT

RADICALS-RT was originally designed to detect an absolute improvement of 5% in disease-specific survival at 10-years from 90% to 95% with 80% power. Since the trial was designed in 2006, further information on disease-specific survival in similar patient cohorts has become available from prospective RCTs, including EORTC 22911 (8) and SWOG 8794 (10). These provide useful estimates as they are both clinical trials and recruited partly during the PSA era; such information was not previously available. The results of these trials show that death from causes other than prostate cancer is a major competing risk, with around only one in four deaths being attributed to prostate cancer and a 10-year disease-specific-survival (DSS) of around 94%; this patient cohort is performing much better than had been anticipated originally. With further treatments (e.g. docetaxel) being available and standard of care at the time of relapse and the development of castrate-refractory disease, the time from the development of distant metastasis until death from prostate cancer has lengthened. An absolute improvement of 5% is not a reasonable assumption if these estimates hold true.

However, the role of adjuvant RT remains controversial and a clinical trial is required to resolve this issue. RADICALS-RT will do this. Therefore, focus has turned towards distant metastases, which is an earlier but clinically important and objective outcome measure. The primary outcome measure for RADICALS-RT is now **freedom-from-distant-metastasis**.

Disease-specific survival, therefore, becomes an important secondary outcome measure. At the main analysis of distant metastases, the trial would expect around 41 deaths from prostate cancer and would have 59% power to detect a halving of the risk of prostate cancer death from 6% at 10-years to 3%, ie DSS improves from 94% to 97%. With further follow-up, RADICALS-RT could attain 80% power for DSS after additional 6 years of follow-up (total duration of the trial would be 18.5 years). However, the question of DSS would be addressed sooner through combined analysis with two parallel trials: RAVES and GETUG-17 (see [Section 9.6](#)).

#### 6.2.2 PRIMARY OUTCOME MEASURE – RADICALS-HD

After 2011, when the primary outcome in RADICALS-RT was amended to freedom-from-distant-metastasis, the primary outcome measure in RADICALS-HD was unchanged and remained disease-specific survival (DSS). Causes of death in patients diagnosed with prostate cancer can be difficult to confirm. A reported death from prostate cancer would be expected to be preceded by a report of hormone refractory metastatic prostate cancer. The clinician's discretion should be used to decide if death during treatment is related to prostate cancer. All UK patients will be flagged with the NHS

Central Register (NHSCR) or equivalent for mortality data to support the data collected on the case report forms (CRFs).

Measures such as central flagging ensure that deaths are captured on the database in an accurate and timely manner. However, the number of deaths from prostate cancer in RADICALS-HD patients continued to be very low and it became apparent that neither the 0 vs 6 month or 6 vs 24 month comparisons would accrue sufficient events for analysis within a realistic timeframe. Deaths from other causes also presented a problem for analysis as a competing risk, even though numbers of ‘all cause’ deaths were also lower than expected. It was therefore decided that the primary outcome of RADICALS-HD would now be metastases-free survival (**MFS**).

### 6.2.3 SECONDARY OUTCOME MEASURES

- **Disease-specific-survival** – (RADICALS-RT only)
- **Freedom from treatment failure:** PSA progression when on androgen deprivation
- **Clinical progression-free survival:** Clinical progression of prostate cancer or initiation of non-protocol hormone therapy or death from prostate cancer.
- **Overall survival:** Death from any cause
- **Non-protocol hormone therapy:** Initiation of hormone therapy other than that randomised
- **Treatment toxicity:** Incidence of severe toxicity or serious adverse events. Radiotherapy treatment planning data is required to understand the cause of treatment toxicity.
- **Patient reported outcomes:** See [Section 13.1](#) for details
- **Freedom from biochemical progression:** Where a biochemical progression event is defined as a PSA level of  $\geq 0.4$ ng/ml following radiotherapy or a PSA level of  $> 2.0$ ng/ml regardless of prior radiotherapy.

### 6.2.4 EARLY REPORTING OF BIOCHEMICAL OUTCOMES

In early 2018, based on the number of primary outcome events in the control arm of the RADICALS-RT comparison, the target number of events was not forecast to occur until 2025. This is several years later than originally expected due to the low event rate. Two other randomised controlled trials (RCTs), RAVES and GETUG 17, also address the question of deferred RT and are planning to report in 2018/2019. The ARTISTIC project is a pre-planned individual patient data meta-analysis, combining RAVES, GETUG-17 and RADICALS-RT. The RADICALS TMG therefore agreed, in February 2018, to publish the Freedom from biochemical progression results of RADICAL-RT to coincide with the other two trials, and enable a timely meta-analysis.

## 6.3 SAMPLE SIZE

### 6.3.1 BASIC ASSUMPTIONS

The original sample size calculations were performed using the `-art-` package in Stata 9(31). The sample size re-calculation was performed in Stata 11.1. using version 1.0.8 (date 24mar2010) of `-art-`, including `-artsurv-` for the main calculation and `-artpep-` for variations. In terms of accrual and follow-up, we assume 5½ to 6½ years of recruitment, attaining a constant rate of accrual by 3 years after initiation of the trial in RADICALS-RT; a steady rate of accrual may be reached slightly later in time in RADICALS-HD as the rate may not peak until patients allocated deferred radiotherapy in RADICALS-RT start to experience biochemical failure. After recruitment, we assume a further 7 years of Follow-up. Clinically, we assume that, in RADICALS-RT, we should only be interested in treatment options with an absolute increase in 10-year freedom-from-distant-metastasis of 5%. In RADICALS-HD, we should only be interested in treatment options with an absolute increase in 10-year metastase-free survival of 6%, at least.

The sample sizes have been calculated separately for the two randomisations because of potential variation in the underlying assumptions, an uncertain proportion of patients joining RADICALS-RT



and RADICALS-HD and some uncertainty about accrual rates. A number of scenarios relating to trial recruitment and assumptions have been calculated and are reported elsewhere but are available upon request. Selected scenarios are reported here.

### 6.3.2 RADICALS-RT SAMPLE SIZE

In the patients suitable for this randomisation, the control arm is assumed to be deferred radiotherapy i.e. radiotherapy at PSA relapse.

When the trial was originally designed, there was uncertainty about the likely event rate but it was anticipated that a modest absolute effect in the order of 5% would be required to convince clinicians to adopt adjuvant radiotherapy for all patients. The original sample size calculations anticipated that around 2,600 patients would need to be recruited over 5½ years and followed-up for a further 7 years in order to obtain 80% power to detect an improvement from 70% to 75% or 90% power to detect an improvement from 80% to 85%.

From SWOG 8794 and EORTC 22911, the proportion of patients free of distant metastases at 10 years is estimated to be 90%. We would look to test whether adjuvant RT can improve this to 95% (hazard ratio 0.487), which is seen as the minimum clinically significant improvement required to routinely introduce adjuvant RT to this patient population; this mirrors the size effect observed in SWOG 8794. This is tested using the superiority design. With 80% power, a two-sided 5% significance level, accrual lasting 5½ years (reaching peak accrual rates after 3 years) and a further 7 years of follow-up, we would need to recruit 1,063 patients in order to observe 66 distant metastases events. This sample size assumes that 30% of patients are lost to follow-up and around 30 patients per month randomised from 30 months onward. Therefore, the target sample size will be reduced from 2,600 to around 1,063 patients. This assumes that 30% of patients are lost to follow-up between 5 and 10 years.

If the peak accrual is lower, at around 25 patients per month, accrual would be extended by 1 year, to around 6½ years and around 1,160 patients would be randomised; this should address the question with the same power and in the same overall timescale.

### 6.3.3 RADICALS-HD SAMPLE SIZE

Patients would be suitable for this randomisation if they are planned for post-operative radiotherapy regardless of whether this is the early or deferred setting.

There is some uncertainty in the baseline disease-specific survival (DSS) rate for patients receiving early RT and for patients receiving deferred RT. It is assumed that patients receiving early radiotherapy do at least as well as patients receiving deferred radiotherapy, timed from randomisation to RADICALS-HD. There is also uncertainty over the proportion of early and deferred patients that would join the trial; it is assumed that at least as many patients in the deferred setting will be randomised, if not two to three times more.

Since the trial was designed in 2006, further information on the baseline estimates of disease specific survival have become available from similar patient cohorts, including data from the RTOG 9601, SWOG 8794 and EORTC 22911 trials. These provide useful estimates as they are clinical trials and recruited partly during the PSA era; such information was not previously available when RADICALS-HD was designed.

Sites and patients are encouraged to join the three-way randomisation of no-HT vs STHT vs LTHT in RADICALS-HD as this is the most efficient for the trial. However, it has become apparent that the three-way randomisation is less well supported than either of the two separate potential two-way randomisations: no-HT vs STHT and STHT vs LTHT. These are each clinically important questions and

the trial will address both. It will not be possible to address one of the originally envisaged comparisons: no-HT vs LTHT with any reasonable degree of power, although the comparison will be performed. Therefore, there are two main comparisons in RADICALS-HD:

1. RT-only (no-HT) vs RT + short-term hormone therapy (STHT)
2. RT+ short-term HT (STHT) vs RT + long-term HT (LTHT)

It is assumed that patients who enter RT+STHT vs RT+LTHT comparison have a slightly higher risk of a disease event than patients who enter RT-only vs RT+STHT comparison because the clinician assumes that some HT is required; therefore, their 10 year DSS rate is estimated as being lower.

#### **6.3.3.A COMPARISON: NO-HT VS RT+STHT**

##### **Original power calculations:**

It was estimated that DSS would be 85% at 10 years in patients on the no-HT arm. This superiority trial is testing whether addition of STHT to RT can improve this to 91% (hazard ratio HR=0.58). A total of 1263 patients (128 events) in a comparison of no-HT vs STHT would allow for 80% power to detect an increase of 6% in 10-year DSS with a 3% significance level (accounting for the multiple use patients who join the three-way randomisation). This assumes that 30% of patients are lost to follow-up. Peak accrual would be around 31 patients per month in the comparison of no-HT vs RT+STHT.

If peak accrual is lower, at around 25 patients per month, accrual would be extended by 1 year to around 6.5 years and around 1368 patients would be randomised; this should address the question in the same timescale with the same power.

##### **Updated power calculations:**

The primary outcome measure of RADICALS-HD was amended from DSS to MFS after peer review in 2019 and without any reference to accumulating, comparative data. At this point, recruitment was already completed with 1480 patients in the 0 vs 6 months comparison. It is estimated that MFS will be approximately 80% at 10 years in patients allocated to the no-HT group. The 0 vs 6 months comparison would have over 80% power, with a two-sided 5% alpha, to detect an absolute increase in MFS of 6%, from 80% in the no-HT group to 86% (HR=0.67) in the short-HT group. Approximately 200 MFS events are anticipated for this analysis.

#### **6.3.3.B COMPARISON: RT+STHT VS RT+LTHT**

##### **Original power calculations:**

It was estimated that DSS would be 87% at 10 years in patients on the STHT arm. This is lower than the estimated 91% 10-yr DSS in the research arm (STHT) in the previous comparison if STHT is more effective than no-HT, as we anticipate that higher risk patients will enter the STHT vs LTHT comparison. This superiority trial is testing whether the LTHT can improve disease-specific survival to 93% at 10 years (hazard ratio HR=0.52). A total of 1077 patients (91 events) in a comparison of STHT vs LTHT would allow for 80% power to detect an increase in 10-year DSS of 6% with a 3% significance level (accounting for the multiple use patients who join the three-way randomisation). This assumes that 30% of patients are lost to follow-up.

This could be achieved in 51/2 years with 26 patients randomised each month from 30 months onwards. Patients would be followed-up for 7 years after the end of recruitment. The numbers above allow for a certain percentage of patients to be lost to follow-up.

If the peak accrual is lower, at around 20 patients per month, accrual would be extended by 1 year to around 6.5 years and around 1129 patients would be randomised; this should address the question in the same timescale with the same power.

### Updated power calculations:

The primary outcome measure of RADICALS-HD was amended from DSS to MFS after peer review in 2019 and without any reference to accumulating, comparative data. At this point, recruitment was already completed with 1524 patients in the 6 vs 24 months comparison. It is estimated that MFS will be approximately 75% at 10 years in patients allocated to the 6-month group of the 6 vs 24 months comparison; it is expected that patients in this comparison will be at higher risk of an event than those in the 0 vs 6 months comparison. The 6 vs 24 months comparison should have over 80% power, with a two-sided 5% alpha, to detect an absolute increase in MFS of 6%, from 75% in the short-HT group to 81% in the long-HT group (HR=0.72). Approximately 300 MFS events are anticipated for this analysis.

#### 6.3.4 OVERALL SAMPLE SIZE

The overall sample size will depend on how many patients are recruited to both RADICALS-RT and RADICALS-HD, and how many patients join the three-arm Hormone Duration Randomisation. It is anticipated that, of patients who have undergone radical prostatectomy, 10% will have a definite indication for non-randomised early radiotherapy and 50% will have a definite indication for following a non-randomised policy of deferred radiotherapy. The value of early radiotherapy will be uncertain in the remaining 40% who, if they meet the eligibility criteria, should be randomised in RADICALS-RT. No formal overall sample size is estimated, but around 2500 patients will be recruited.

Given the number of radical prostatectomies performed each year in the participating countries, these are feasible target sample sizes.

#### 6.3.5 PILOT PHASE

RADICALS incorporates an 18-month feasibility stage during which randomisation rates, and the trial as a whole, will be carefully assessed. Continuation of the trial beyond the feasibility stage was conditional on satisfactory patient accrual. The trial's progress has been repeatedly reviewed by the TMG, TSC and IDMC as well as the funding body. The decision to review and update the sample size calculations has been taken with full discussion and support, particularly by given the efforts to encourage the accrual. Accrual rates will be monitored throughout the trial.

## 6.4 INTERIM MONITORING AND ANALYSES

Formal interim analyses of the accumulating data will be performed at regular intervals (at least, annually) for review by an Independent Data Monitoring Committee (IDMC, see [Section 15.3](#)). These analyses will be performed by statisticians at the MRC CTU at UCL. The IDMC will be asked to give advice on whether the accumulated data from the trial, together with results from other relevant trials, justifies continuing recruitment of further patients or further Follow-up. A decision to discontinue recruitment, in all patients or in selected subgroups, would be made only if the result is likely to convince a broad range of clinicians including participants in the trial and the general clinical community. If a decision is made to continue, the IDMC will advise on the frequency of future reviews of the data on the basis of accrual and event rates. The IDMC will make recommendations to the Trial Steering Committee (TSC, see [Section 15.2](#)) as to the continuation of the trial.

The trial oversight committees will be asked to continue to monitor and comment on any deviation of the accruing data from the underlying assumptions e.g. higher or lower rates of death from prostate cancer than expected or type of patient randomised.

## **6.5 STATISTICAL ANALYSIS PLAN**

The analyses to be performed for RADICALS will be presented in detail in a separate Statistical Analysis Plan. In short, the main analyses will be performed for patients in RADICALS-RT and separately for patients in RADICALS-HD. The main outcome measures will be compared using the standard time-to-event methods of Kaplan-Meier with formal comparisons using log-rank tests and graphically represented with survival plots. Analyses in the hormone duration comparisons will be stratified by the timing of post-operative radiotherapy (early RT vs deferred RT).

## **6.6 INDIVIDUAL PATIENT DATA META-ANALYSIS**

### **6.6.1 RADICALS-RT**

In collaboration with the two parallel trials to RADICALS-RT, RAVES and GETUG-17, and the Meta-analysis Group of the MRC-CTU at UCL, the ARTISTIC collaborative group has been formed in order to prospectively plan a meta-analysis. Pooling summary results and relevant statistics for event free survival from all three trials will facilitate a meta-analysis of almost 2000 patients in total. The resulting increase in power and precision that the meta-analysis provides will enable a timely and definitive assessment of the treatment effects of adjuvant RT in all patients as well as potentially enabling an assessment of treatment effects within subgroups of patients, defined for example by risk groups or by age at randomisation. In due course, as trial outcome data matures, the ARTISTIC collaboration will undertake a full meta-analysis based on individual participant data to assess all outcome measures (see section 1.1.4.A).

### **6.6.2 RADICALS-HD**

Other international groups are conducting overlapping clinical trials therefore, we plan to also undertake a meta-analysis using IPD including RADICALS-HD, GETUG-16, EORTC 22043/30041, RTOG 05-34 (SPPORT) and RTOG 96-01 and any other relevant trial identified in a full systematic review. Together these trials will provide increased power for analysis of both disease-specific survival and overall survival. Formal agreements will be developed with all trial groups.

## 7 QUALITY ASSURANCE AND CONTROL

### 7.1 COMPLIANCE

RADICALS will be conducted according to the protocol, relevant Standard Operating Procedures (SOPs), GCP and relevant national regulatory requirements.

### 7.2 RADIOTHERAPY QUALITY ASSURANCE

The RADICALS Radiotherapy Trials Quality Assurance (RTTQA) Group, consisting of radiation oncologists and radiotherapy physicists, will give information and guidance regarding implementation of the protocol, monitor compliance with the protocol, and provide feedback on the RTQA accreditation (where necessary).

RTQA accreditation is required by all centres (see [Appendix B](#)). However, centres that have been RTQA accredited for another multi-centre prostate radiotherapy trial in the UK (e.g. MRC RT01 or CHHIP) will be automatically granted RADICALS-RTQA accreditation.

The RADICALS website will include sample cases to illustrate the Clinical Target Volumes described in [Section 6.1.3.A](#).

Data will be collected by the NCRI Radiotherapy Trials QA (RTTQA) Group for patients treated in the RADICALS trial. This includes: CT images, contours, plan and plan dose cubes along with DVHs. Data must be appropriately anonymised.

### 7.3 MONITORING AND AUDIT

A risk assessment has been carried out and an appropriate monitoring plan has been developed. Monitoring will be a combination of central monitoring (e.g. database checks) and the IDMC review as described in [Section 15.3](#). There will be limited on-site monitoring: all participating investigators and groups must agree to direct access to all trial related sites, source data documents and reports for the purpose of monitoring by the sponsor and audit and inspection by domestic and foreign regulatory authorities.

### 7.4 SOURCE DATA

The investigator/institution should maintain adequate and accurate source documents and trial records that include all pertinent observations on each of the site's trial subjects. Source data are contained in source documents and are defined by EU guidelines as all information in original records that are used for the reconstruction and evaluation of the clinical trial. Source documents are the first place where the source data is recorded. These can include hospital records, clinical and office charts, laboratory notes, X-rays, and pharmacy dispensing records.

Source data should be attributable, legible, contemporaneous, original, accurate, and complete. Changes to source data should be traceable, should not obscure the original entry, and should be explained if necessary (e.g., via an audit trail). Each data element should only have one source.

Data will be recorded on case report forms (CRF). The original should be sent to the appropriate participating group and a copy kept at the local centre. The type of data to be recorded is detailed in Section 7, the Assessments and Procedures section.

The following data should all be verifiable from source documents, which may include paper notes and electronic health records:

- signed consent and (where applicable) assent forms
- dates of visits including dates any trial specimens were taken and processed in the laboratory
- eligibility and baseline values
- adverse events of any grade that lead to treatment modification and adverse events judged definitely/probably/possibly related to IMP
- severe (grade 3/4) adverse events
- serious adverse events
- dates IMP (hormone therapy) was dispensed and administered

#### **7.4.1 DATA HANDLING**

The site will retain a copy of each CRF. All data recorded in each CRF, will be entered onto the RADICALS trial clinical database. A comprehensive validation check program will identify missing, illogical and/or inconsistent data. Trained data management personnel will review the resulting discrepancy report, correcting any data entry errors. If investigator input is required to clarify or correct any missing, ambiguous or inconsistent data, the data manager will generate a Data Clarification Form (DCF). The Data Manager will send this form to the investigator for completion. When the completed DCF is returned to data management, the data on the clinical database will be corrected accordingly.

#### **7.5 PROTOCOL DEVIATIONS**

If the site identifies a protocol deviation they should notify the PI within 24 hours. The PI and team should review the deviation and create a suggested corrective action plan. This corrective plan should be reported to the MRC CTU team, who will review it and the deviation. The site will keep a protocol deviation log and the completed corrective action plan in order to ensure, as far as possible, that the deviation does not reoccur.

## 8 SAFETY REPORTING

ICH GCP requires that both investigators and sponsors follow specific procedures when notifying and reporting adverse events/reactions in clinical trials. These procedures are described in this section of the protocol. [Section 11.1](#) lists definitions, [Section 11.3](#) gives details of the institution/investigator responsibilities and [Section 11.4](#) provides information on MRC CTU at UCL responsibilities.

### 8.1 DEFINITIONS

The definitions of the EU Directive 2001/20/EC Article 2 based on ICH GCP apply in this trial protocol. These definitions are given in [Table 6](#). These definitions apply to RADICALS investigators in the UK and Canada.

**Table 6: Terms and definitions for adverse events**

| TERM                                                                                                                   | DEFINITION                                                                                                                                                                                                                                                                                                                                                                                                                                                      |
|------------------------------------------------------------------------------------------------------------------------|-----------------------------------------------------------------------------------------------------------------------------------------------------------------------------------------------------------------------------------------------------------------------------------------------------------------------------------------------------------------------------------------------------------------------------------------------------------------|
| Adverse Event (AE)                                                                                                     | Any untoward medical occurrence in a patient or clinical trial subject to whom a medicinal product has been administered including occurrences which are not necessarily caused by or related to that product.                                                                                                                                                                                                                                                  |
| Adverse Reaction (AR)                                                                                                  | Any untoward and unintended response to an investigational medicinal product related to any dose administered.                                                                                                                                                                                                                                                                                                                                                  |
| Unexpected Adverse Reaction (UAR)                                                                                      | An adverse reaction, the nature or severity of which is not consistent with the information about the medicinal product in question set out in the summary of product characteristics (or Investigator brochure) for that product.                                                                                                                                                                                                                              |
| Serious Adverse Event (SAE) or Serious Adverse Reaction (SAR) or Suspected Unexpected Serious Adverse Reaction (SUSAR) | Respectively any adverse event, adverse reaction or unexpected adverse reaction that: <ul style="list-style-type: none"><li>• results in death</li><li>• is life-threatening*</li><li>• requires hospitalisation or prolongation of existing hospitalisation**</li><li>• results in persistent or significant disability or incapacity</li><li>• consists of a congenital anomaly or birth defect</li><li>• is another important medical condition***</li></ul> |

### 8.2 CLARIFICATIONS

\*Life-threatening, in the definition of 'serious', refers to an event in which the patient was at risk of death at the time of the event; it does not refer to an event which hypothetically might have caused death if it were more severe.

\*\*Hospitalisation is defined as an inpatient admission, regardless of length of stay, even if the hospitalisation is a precautionary measure for continued observation. Hospitalisations for a pre-existing condition (including elective procedures that have not worsened) do not constitute an SAE.

\*\*\*Medical judgement should be exercised in deciding whether an AE/AR is serious in other situations. Important AE/ARs that are not immediately life-threatening or do not result in death or

hospitalisation but may jeopardise the subject or may require intervention to prevent one of the other outcomes listed in the definition above, should also be considered serious.

Please note that SAEs should also be reported as routine toxicities where that toxicity is also collected on one of the routine assessment forms.

### **8.2.1 MEDICINAL PRODUCTS**

An investigational medicinal product is defined as the tested investigational medicinal product and the comparators used in the study. (EU guidance ENTR/CT 3, April 2006 revision).

Adverse reactions include any untoward or unintended response to drugs. Reactions to an IMP or comparator should be reported appropriately.

### **8.2.2 ADVERSE EVENTS**

Adverse Events include:

- An exacerbation of a pre-existing illness
- An increase in frequency or intensity of a pre-existing episodic event or condition
- A condition (even though it may have been present prior to the start of the trial) detected after trial drug administration
- Continuous persistent disease or a symptom present at baseline that worsens following administration of the study treatment

## **8.3 DISEASE RELATED EVENTS AND ELECTIVE HOSPITALISATION**

SAEs related to disease progression, or death as a result of disease progression, are exempt from expedited reporting and should be reported on the Follow Up Form (CRF 9), Disease Event Form (CRF 7) and/or Death Report Form (CRF 9) instead of the SAE Form.

The following situations regarding elective hospitalisation that fulfil the definition of an SAE are also excluded from expedited reporting and should be reported on the Follow-up Form instead of the SAE Form:

- Elective hospitalisation to simplify treatment or procedures
- Elective hospitalisation for pre-existing conditions that, in the investigator's opinion, have not been exacerbated by trial treatment

There are no other treatment-related toxicities that result in hospitalisation for symptom control which are excluded from expedited reporting. Life-threatening or fatal events should still be reported on the SAE form.

### **8.3.1 INSTITUTION RESPONSIBILITIES**

All non-serious AEs/ARs, whether expected or not, should be recorded in the patient's medical notes. Specific toxicities should be reported for the trial in the toxicity (symptoms) section of the Follow-up form (CRF 6) and sent to the MRC CTU at UCL within one month of the form being due. The specific toxicities reported for the trial are diarrhoea, proctitis, cystitis, haematuria, urethral stricture & rectal haemorrhage. SAEs/SARs should be notified to the MRC CTU at UCL as described below.

The severity (i.e. intensity) of all AEs/ARs (serious and non-serious) in this trial should be graded using the NCI CTCAE v3.0. The full list is available at [https://ctep.cancer.gov/protocolDevelopment/electronic\\_applications/docs/ctcae3.pdf](https://ctep.cancer.gov/protocolDevelopment/electronic_applications/docs/ctcae3.pdf).



A flowchart is given at the end of this section to help explain the notification procedures. Any questions concerning this process should be directed to the MRC CTU at UCL in the first instance.

### 8.3.2 INVESTIGATOR RESPONSIBILITIES

All AEs, should be recorded in the patient’s medical notes and reported in the toxicity (symptoms) section of the Follow-up Form and sent to the CTU within the agreed timescale (see **Table 5, Section 7.1**). SAEs should be notified to the CTU within 24 hours of the investigator becoming aware of the event.

### 8.3.3 INVESTIGATOR ASSESSMENT

#### 8.3.3.A SERIOUSNESS

When an AE/AR occurs, the investigator responsible for the care of the patient must first assess whether the event is serious using the definition given in **Table 6**. If the event is serious and not exempt from expedited reporting (see Safety Reporting Flowchart), then an SAE form must be completed and the trials unit notified within 24 hours of becoming aware of the event.

#### 8.3.3.B CAUSALITY

The Investigator must assess the causality of all serious events/reactions in relation to the trial therapy using the definitions in **Table 7**. There are 5 categories: unrelated, unlikely, possible, probable and definitely related. If the causality assessment is unrelated or unlikely to be related the event is classified as a SAE. If the causality is assessed as either possible, probable or definitely related then the event is classified as a SAR.

**Table 7: Assigning Type of SAE Through Causality**

| RELATIONSHIP | DESCRIPTION                                                                                                                                                                                                                                                                                                                     | SAE TYPE      |
|--------------|---------------------------------------------------------------------------------------------------------------------------------------------------------------------------------------------------------------------------------------------------------------------------------------------------------------------------------|---------------|
| Definitely   | There is clear evidence to suggest a causal relationship and other possible contributing factors can be ruled out.                                                                                                                                                                                                              | SAR           |
| Probable     | There is evidence to suggest a causal relationship and the influence of other factors is unlikely.                                                                                                                                                                                                                              | SAR           |
| Possible     | There is some evidence to suggest a causal relationship (for example, because the event occurs within a reasonable time after administration of the trial medication). However, the influence of other factors may have contributed to the event (for example, the patient’s clinical condition, other concomitant treatments). | SAR           |
| Unlikely     | There is little evidence to suggest that there is a causal relationship (for example, the event did not occur within a reasonable time after administration of the trial medication). There is another reasonable explanation for the event (for example, the patient’s clinical condition, other concomitant treatment).       | Unrelated SAE |
| Unrelated    | There is no evidence of any causal relationship                                                                                                                                                                                                                                                                                 | Unrelated SAE |

If an SAE is considered to be related to trial treatment and drug is stopped or the dose modified, refer to **Section 10.3.3.E**.

### 8.3.3.C EXPECTEDNESS

If there is at least a possible involvement of the trial treatment (or comparator), the investigator may make an initial assessment of the expectedness of the event, however the Sponsor has the overall responsibility for determination of expectedness. In the case of hormone therapy, an unexpected adverse reaction is one not previously reported in the current Reference Safety Information (approved versions located on trial website - <http://www.radicals-trial.org/radicals-members-area/>) or one that is more frequent or more severe than previously reported. The definition of an unexpected adverse reaction (UAR) is given in **Table 7**.

The main expected short term side-effects which may occur during or after radiotherapy treatment include tiredness, skin irritation, pubic hair loss, urinary frequency, decreased urinary stream, haematuria, need for urinary catheter, diarrhoea and bowel urgency. Late effects of radiotherapy treatment include bowel urgency, frequency or bleeding, urinary frequency, urinary urgency, erectile dysfunction, infertility, and increased risk of bladder or bowel cancer.

### 8.3.3.D NOTIFICATION

The MRC CTU at UCL should be notified within 24 hours of the investigator becoming aware of an event that requires expedited reporting. Investigators should notify the MRC CTU at UCL of all SAEs occurring from the time of randomisation until 30 days after the last protocol treatment administration. SARs and SUSARs must be notified to the MRC CTU at UCL until the submission of the end of trial notification (i.e. no matter when they occur after randomisation). Any subsequent events that may be attributed to treatment should be reported to the MHRA using the yellow card system.

### 8.3.3.E NOTIFICATION PROCEDURE:

- a. The SAE form must be completed by the Investigator (named on the Signature List and Delegation of Responsibilities Log, who is responsible for the patient's care; this will be either the Principal Investigator or another medically qualified person with delegated authority for SAE reporting)), with due care being paid to the grading, causality and expectedness of the event as outlined above. In the absence of the responsible investigator the form should be completed and signed by a member of the site trial team and faxed or emailed as appropriate. The responsible investigator should subsequently check the SAE form, make changes as appropriate, sign and then re-fax to the MRC CTU at UCL as soon as possible. The initial report shall be followed by detailed, written reports as appropriate.
- b. The minimum criteria required for reporting an SAE are the trial number, name of investigator reporting, the event, and why it is considered serious.
- c. Send the SAE form by fax or email to the MRC CTU at UCL within 24 hours of the investigator's knowledge of the event.  
Fax Number: see box, below
- d. Follow-up: Patients must be followed-up until clinical recovery is complete and laboratory results have returned to normal or baseline, or until the event has stabilised. Follow-up should continue after completion of protocol treatment if necessary. Follow-up information should be noted on a further SAE form by ticking the box marked 'Follow-up' and faxing to the MRC CTU at UCL as information becomes available. Extra, annotated information and/or copies of test results may be provided separately. The patient must be identified by trial number, date of birth and initials only. The patient's name should not be used on any correspondence and should be deleted from any test results.

Staff should follow their institution's procedure for local notification requirements.

## 8.4 CTU RESPONSIBILITIES

Medically qualified staff at the MRC CTU at UCL and/or the Chief Investigator (or a medically qualified delegate) will review all SAE reports received. The causality assessment given by the local Investigator at the hospital cannot be overruled and in the case of disagreement, both opinions will be provided in any subsequent reports.

The MRC CTU at UCL is undertaking the duties of trial sponsor and is responsible for the reporting of all SUSARs and other SARs to the regulatory authorities (MHRA and competent authorities of other European member states and any other countries in which the trial is taking place) and the research ethics committees as appropriate. Fatal and life-threatening SUSARs must be reported to the competent authorities within 7 days of the CTU becoming aware of the event; other SUSARs must be reported within 15 days.

The MRC CTU at UCL will also keep all investigators informed of any safety issues that arise during the course of the trial.

The CTU, as Sponsor, will submit Annual Safety Reports in the form of a Developmental Safety Update Report (DSUR) to Competent Authorities (Regulatory Authority and Ethics Committee).

### **SAE NOTIFICATION**

**WITHIN 24 HOURS OF BECOMING AWARE OF AN SAE, PLEASE FAX A COMPLETED  
SAE FORM TO THE  
MRC CLINICAL TRIALS UNIT AT UCL ON:  
FAX: +44 (0)20 7670 4818**

## Safety Reporting Flowchart

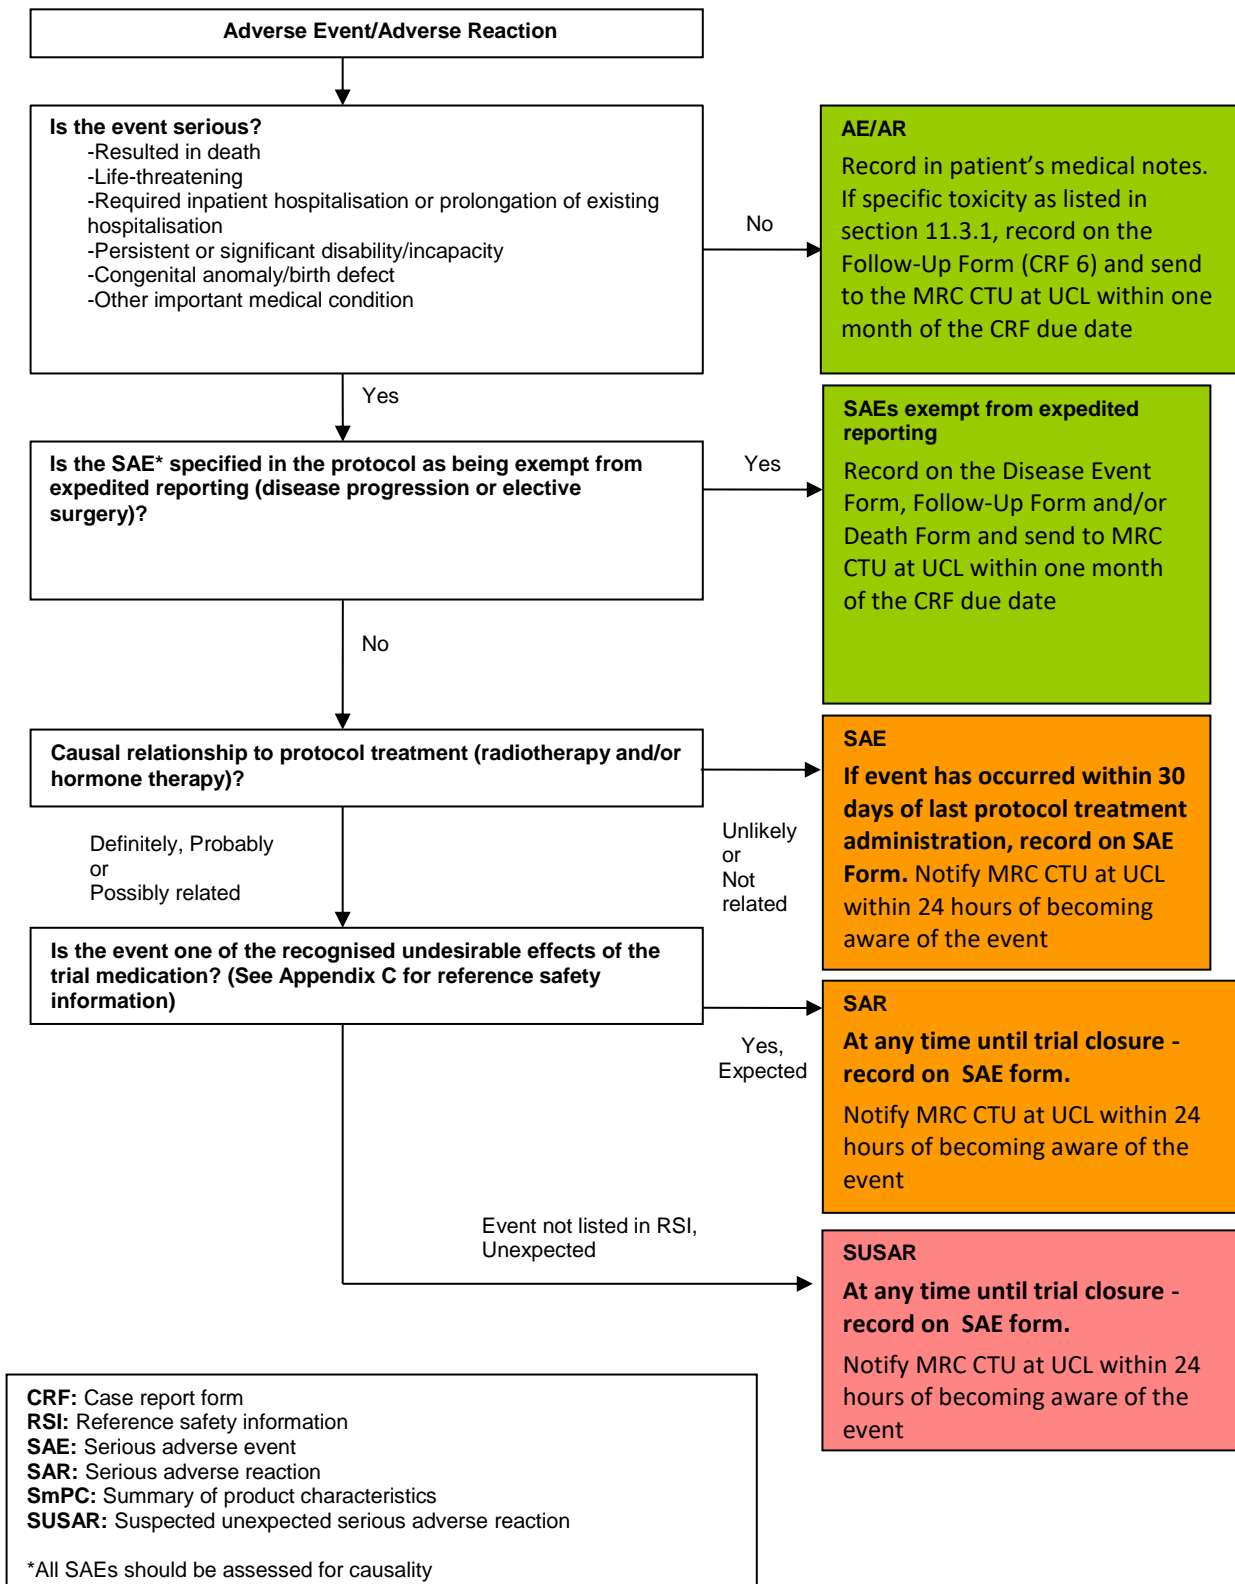

## 9 ETHICAL CONSIDERATIONS

Participation in a randomised controlled trial means that the patient and clinician are not able to choose all aspects of patient treatment but do choose to be randomised. Patients will receive different treatments and toxicities are different by arm; this will all be explained to patients. All trial treatments and Follow-up schedules are routine practice across the UK. This trial is designed to fit with clinical practice; there are:

- No additional visits or assessments required by the trial
- No additional risks caused by participating in the trial and trial treatment.

The study will abide by the principles of the Declaration of Helsinki. Each patient's consent to participate in the trial should be obtained after a full explanation of the treatment options, including the conventional and generally accepted methods of treatment.

The right of the patient to refuse to participate in the trial without giving reasons must be respected. After the patient has entered the trial, the clinician must remain free to give alternative treatment to that specified in the protocol, at any stage, if he/she feels it to be in the best interest of the patient. However, the reason for doing so should be recorded and the patient will remain within the trial for the purpose of Follow-up and data analysis according to the treatment option to which they have been allocated. Similarly, the patient must remain free to withdraw at any time from the protocol treatment and trial Follow-up without giving reasons and without prejudicing his/her further treatment.

The investigator must ensure that patient's anonymity will be maintained and that their identities are protected from unauthorised parties. On CRFs patients will not be identified by their names, but by an identification code. The investigator should keep a patient enrolment log showing codes, names and addresses.

A statement of MRC policy on ethical considerations in clinical trials of cancer therapy, including the question of informed consent, is available from the MRC Head Office web site (<https://mrc.ukri.org/research/policies-and-guidance-for-researchers/>).

## 10 ANCILLARY STUDIES

### 10.1 PATIENT-REPORTED OUTCOMES

There are limited patient-reported data (Quality of Life (QL) scores) on symptoms and morbidities associated with treatments after radical prostatectomy. No single questionnaire can adequately collect data in all of these areas. Therefore, patients will be asked to complete a number of short questionnaires.

Patient-reported outcome data will be collected from patients in the Radiotherapy Timing Randomisation in the UK and Canada, at least, via self-administered questionnaires. The questionnaires will assess general quality of life and health economics (SF-12, EQ-5D), urinary function (ICSmaleSF), bowel function (Vaizey) and sexual function (SHIM: IIEF-5).

The main objectives of this study are to determine the impact of:

- RT on general QL, sexual function, urinary function and bowel function
- Duration of hormone therapy on general quality of life, and sexual function

QL will be assessed prior to randomisation and at 1, 5 and 10 years. A separate quality of life protocol describes the study in more detail (see [Appendix A VI](#)).

### 10.2 HEALTH ECONOMICS

It is expected that clinical and quality of life issues will primarily drive the interpretation of trial results. However, data will be collected to allow potential health economic analyses. The trial will collect core data on resource use (treatments, in-patient and out-patient hospitalisations), and patients will regularly complete EQ-5D questionnaires which will generate preference-based measures of quality of life for possible calculation of quality-adjusted life-years. The trial will take around a decade to mature given the usually good prognosis of this patient group. A separate sub-protocol will be developed prior to any planned analyses.

### 10.3 TRANSLATIONAL RESEARCH

Optional translational studies will be planned and introduced early during the trial, subject to funding applications. The protocol will be amended appropriately to reflect any changes regarding translational studies.

## 11 APPROVALS AND INDEMNITY

### 11.1 ETHICS APPROVALS

The trial protocol has received the favourable opinion of a main Research Ethics Committee or Institutional Review Board (IRB) in the approved national participating countries. Local ethics approvals and other related documentation required are detailed in local [Appendix B](#).

### 11.2 REGULATORY APPROVAL

This is a trial of Investigational Medicinal Products (IMPs) and therefore must be approved by the national competent authority. Details of national approvals are given in local [Appendix B](#).

### 11.3 INDEMNITY

Each collaborating group has ensured that appropriate arrangements for indemnity to cover the liability of the investigator, including insurance where necessary, have been made according to their national guidelines. See guidelines in local [Appendix B](#).

## 12 TRIAL COMMITTEES

### 12.1 TRIAL MANAGEMENT GROUP (TMG)

A Trial Management Group (TMG) has been formed comprising the Chief Investigator, other lead investigators (clinical and non-clinical), PPI contributors and members of the Data Centres. The TMG will be responsible for the day-to-day running and management of the trial and will meet at least 3 times a year by teleconference. Further details of TMG functioning are presented in the TMG charter.

### 12.2 TRIAL STEERING COMMITTEE (TSC)

The Trial Steering Committee (TSC) has membership from TMG plus independent members, including the chair. The role of the TSC is to provide overall supervision for the trial and provide advice through its independent Chairman. The ultimate decision for the continuation of the trial lies with the TSC. Further details of TSC functioning are presented in the TSC charter.

### 12.3 INDEPENDENT DATA MONITORING COMMITTEE (IDMC)

The Independent Data Monitoring Committee (IDMC) is the only group who sees the confidential, accumulating data to the trial. Reports to the IDMC will be produced by the MRC CTU at UCL statisticians. The IDMC will meet within 6 months of the trial opening with the frequency of meetings dictated by the IDMC. The IDMC will consider data in accordance with the analysis plan (see Section 9.5) and will be advisory to the TSC. The IDMC can recommend premature closure or reporting of the trial, or that recruitment to any research arm be discontinued.

Further details of IDMC functioning, and the procedures for interim analysis and monitoring are provided in the IDMC charter.

### 12.4 ENDPOINT REVIEW COMMITTEE (ERC)

The Endpoint Review Committee will be a small group, comprising at least one person blind to allocated treatment, will review the primary outcome measure (prostate cancer deaths). Details of the criteria and principles are part of the analysis plan which is in [Section 9.5](#).

### 12.5 QUALITY OF LIFE SUBGROUP

The Quality of Life Subgroup issues guidance surrounding quality of life, including selection of the quality of life tools, and guidance on administration of the questionnaire.

### 12.6 RADIOTHERAPY QUALITY ASSURANCE SUBGROUP

The Radiotherapy Quality Assurance Subgroup developed the RT quality assurance (QA) plan and issued guidance on delivering RT in this trial.

### 12.7 PATHOLOGY QUALITY ASSURANCE SUBGROUP

The Pathology Quality Assurance Subgroup developed the pathology QA plan and issued guidance on reporting pathology for trial.



## 12.8 TRANSLATIONAL STUDIES GROUP

The Translational Studies Group aim to develop and implement appropriate and high quality bolt-on studies.

Figure 4: Diagram of relationships between trial committees

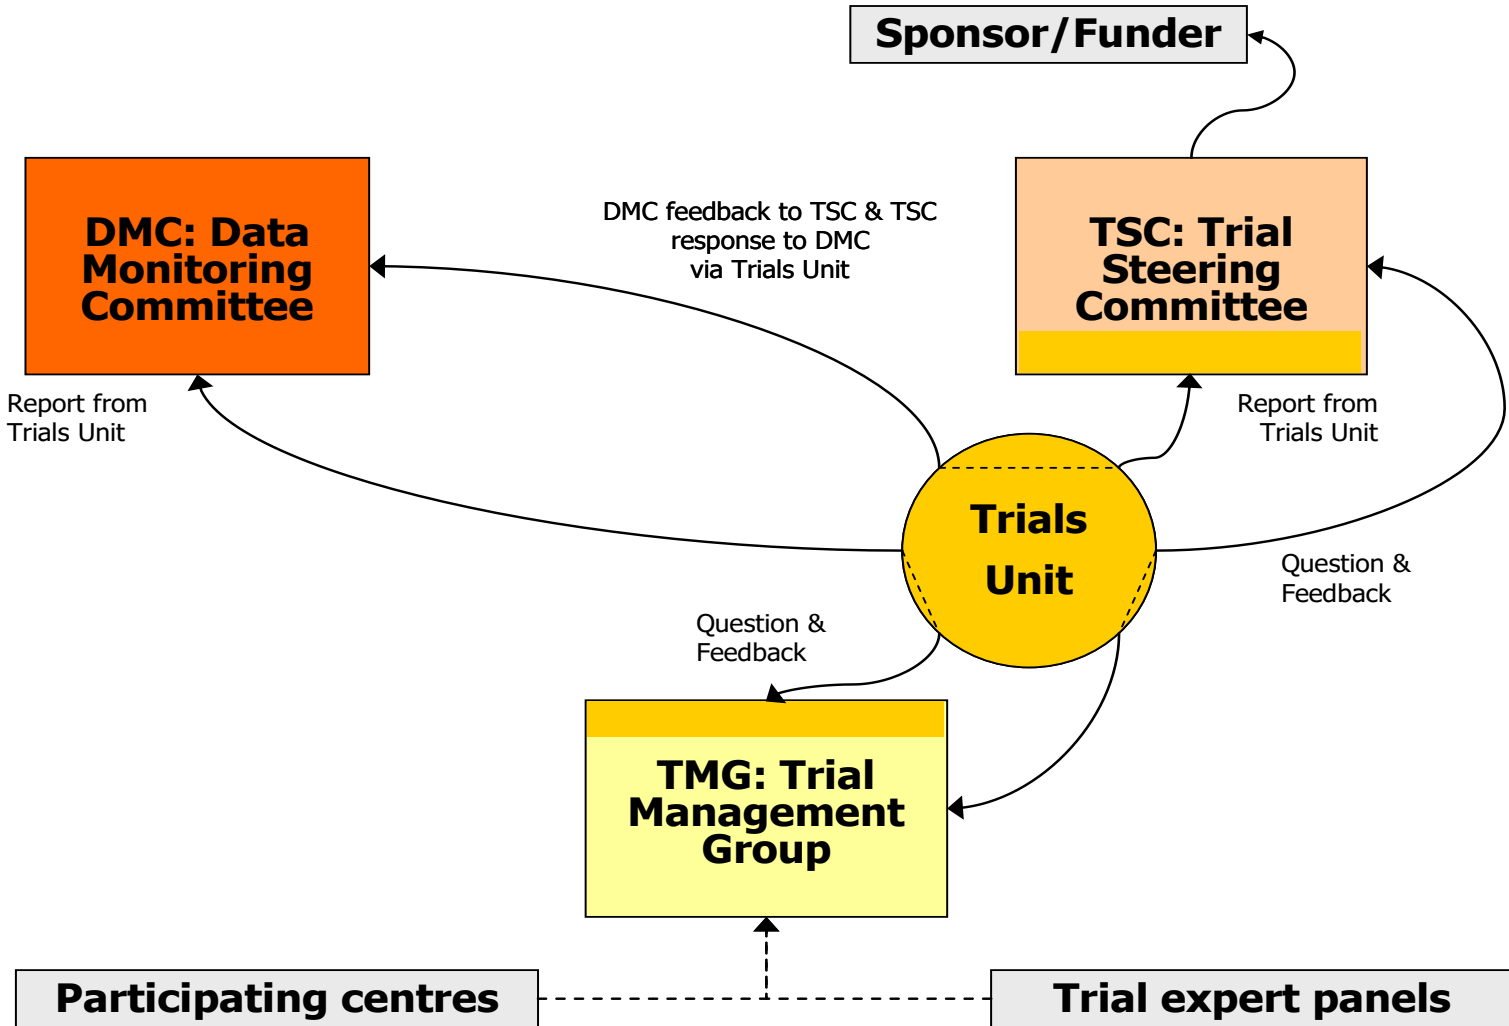

## 13 PUBLICATION AND DISSEMINATION OF RESULTS

The results from different centres and participating groups will be analysed together and published as soon as possible. Individual groups/clinicians must not publish data concerning their patients that are directly relevant to questions posed by the study until the Trial Management Group has published its report. The Trial Management Group will form the basis of the Writing Committee and will advise on the nature of all publications.

## 14 PROTOCOL AMENDMENTS

This is version 7.0 of the protocol.

### 14.1 PROTOCOL

#### 14.1.1 AMENDMENTS MADE TO PROTOCOL VERSION 1.0 MARCH 2007

1. Page ii – CTA reference added
2. Page iii – Ethics information removed
3. Page iii – Colleen Savage replaced as Intergroup Affairs Study Coordinator by Andrea Hiltz
4. Page 3 – Radiotherapy Quality Assurance added to list of Appendix B contents
5. Section 6.1.3.5 – Dose and volume objectives in Tables 3 and 4 changed
6. Section 10.3 – Reference to section 10.3 removed
7. Section 11.2 – Sentence added to remind that routine toxicities should be reported as SAEs
8. Section 11.4 - <CRF name> updated to Follow-up Form (CRF6) in Figure 4

#### 14.1.2 AMENDMENTS MADE TO PROTOCOL VERSION 1.1 JUNE 2007

1. Page ii – Lillian Tsang replaced as Data Manager by Lindsey Masters
2. Page iii – Fred Saad added as a NCIC CTG Medical Expert
3. Section 1.1.1 – Explanation of three-way and two-way randomisation added
4. Section 1.1.3.2 – Information on free Eligard supply for patients in Canada removed
5. Section 4 – Prior hormone therapy removed from main entry exclusion criteria
6. Section 4 – Neoadjuvant treatment removed from main entry exclusion criteria
7. Section 4 – Hypogonadism removed from main entry exclusion criteria
8. Section 4 – Hormone therapy within previous 6 months added to main entry exclusion criteria
9. Section 4 – Radiotherapy Timing Randomisation exclusion criterion changed to more than 5 months since radical prostatectomy and a clarification that trial treatment should ideally start within 5 months after surgery added
10. Section 4 – Within 3 months after radical prostatectomy removed from Radiotherapy Timing Randomisation inclusion criteria
11. Section 4 – Hormone Duration Randomisation exclusion criteria changed from PSA > 10ng/ml to 5ng/ml
12. Section 5.2 – Randomisation CRF numbers updated to 1a, 1b, 2 and 3 or 4
13. Section 5.3 – Overall Summary of trial updated to include patients allocated to deferred RT with no PSA rise
14. Section 6.1.3.3 – Guidance added to title of treatment volumes section
15. Section 6.1.3.4 – Text changed to ‘minimal dose to the PTV not less than...’
16. Section 6.2.2 – Eligard information for patients in Canada removed
17. Section 6.2.2.1 – Information on free Eligard supply for patients in Canada removed
18. Section 6.2.3 – Eligard information for patients in Canada removed
19. Section 6.2.3.1 – Information on free Eligard supply for patients in Canada removed
20. Section 7.1 – Numbering of Baseline Information Form changed to 1b
21. Section 7.1 – Patient History Form (CRF1b) added

#### 14.1.3 AMENDMENTS MADE TO PROTOCOL VERSION 2.0 JANUARY 2008

1. Section 6.1.3.2 – Statement added to confirm that Intensity-Modulated Radiation Therapy (IMRT) may be used.
2. Section 6.1.3.3 – Statement added to clarify that treatment volumes are for guidance only.
3. Section 6.1.3.5 – Tables 3 & 4 – Dose volume objectives for the bladder have been updated as follows:

| Dose | Volume Objective |
|------|------------------|
| 50Gy | 80%              |
| 60Gy | 50%              |

- Section 10.2 – Updated explanation of the role of the radiotherapy quality assurance (RTQA) group and requirements for the RTQA process.

#### 14.1.4 AMENDMENTS MADE TO PROTOCOL VERSION 2.2 DECEMBER 2008

- Page ii – Lindsey Masters replaced by Ben Spittle as Data Manager
- Page ii – Gordana Jovic included as Statistician
- Page iii – NCIC CTG funder renamed Canadian Cancer Society – Research Institute
- Section 1.1 and throughout document – immediate radiotherapy now referred to as early radiotherapy and early salvage radiotherapy policy now referred to as deferred radiotherapy.
- Section 1.1 and throughout document – 5 months changed to 22 weeks for clarity.
- Section 1.1 – Clarification that patients joining the Radiotherapy Timing Randomisation and allocated to early radiotherapy are encouraged to but not required to also join the Hormone Duration Randomisation.
- Section 1.1.3.2 – Clarification of the possibility to randomise between all three arms or two of the three arms of the Hormone Duration Randomisation including diagrams (Figure 3).
- Section 4 – Patient inclusion and exclusion criteria
  - Clarification that pre-operative hormone therapy within previous 6 months is an exclusion criterion
  - Addition of clarification that previous pre-operative hormone therapy for longer than 8 months is an exclusion criterion as is any post-operative hormone therapy
  - Addition of more specific inclusion criteria for Radiotherapy Timing Randomisation
  - Change of inclusion criterion from PSA  $\leq 0.4\text{ng/ml}$  to  $\leq 0.2\text{ng/ml}$
- Section 4.1 - Addition of Timing of Investigations table for Hormone Duration Randomisation and change of requirements for bone scans.
- Section 5.1.1 – correction of typographical error – randomisation should be performed with five months after radical prostatectomy.
- Section 5 – Removal of overall trial design Figure – now in Appendix A
- Section 6.1 – Clarification that treatment with radiotherapy or hormone therapy will commence within two months of the randomisation.
- Section 6.1.1 – Clarification that patients allocated to early radiotherapy in the Radiotherapy Timing Randomisation can also join the Hormone Duration Randomisation if they wish or the use of hormones can be decided by the investigator.
- Section 6.1.3 – Additional clarification that radiotherapy should start within approximately two months of randomisation.
- Section 6.1.3.3 – Clarification of formula to calculate % SV involvement risk.
- Section 6.2 – Clarification that radiotherapy should ideally start within 2 months after randomisation and that radiotherapy should begin 2 months after hormone therapy.
- Section 6.2 – Clarification that bicalutamide monotherapy is not approved for use in Canada.
- Section 6.2.2 – Inclusion of degarelix as acceptable treatment for 6 months
- Section 6.5 – Removal of sentence regarding study specific drug logs for study medication in Canada.
- Section 13.1 – Inclusion of Canada in patient-reported outcomes study.

#### 14.1.5 AMENDMENTS MADE TO PROTOCOL VERSION 3.0 OCTOBER 2009

- Page i – Amendment made to show compliance with principles of GCP.
- Page i – Sponsor address updated.
- Page i – Danish and Irish sites included as MRC CTU sites.

4. Page ii – Clarification that Cancer Research UK and Medical Research Council are funding the trial in the UK.
5. Page ii - Ben Spittle replaced by Paul Patterson as Data Manager
6. Page ii – MRC CTU address updated.
7. Section 1.1 and throughout document – Radiotherapy Timing Randomisation and Hormone Duration Randomisation also referred to as RADICALS-RT and RADICALS-HD.
8. Section 1.1.4 – Outcome measures listed separately for RADICALS-RT and RADICALS-HD
9. Section 1.1.4.1 – RADICALS-RT primary outcome measure changed to freedom from distant metastasis and disease-specific survival added to list of secondary outcome measures.
10. Section 1.1.4.2 – Number of patients required for each randomisation amended.
11. Section 1.1.5 – Addition of up to 61/2 years of accrual and 6 to 7 years of follow-up.
12. Section 2.1 – Updated data from other sources added.
13. Section 2.2 – Updated data from other sources added.
14. Section 2.3 – Updated data from other sources added.
15. Section 2.4 – Updated data from other sources added.
16. Section 2.5 – Addition of information on other ongoing relevant studies and trials.
17. Section 4 – Clarification that RADICALS-RT randomisation should ideally be more than 4 weeks and less than 22 weeks after radical prostatectomy.
18. Section 4 - Clarification that patients joining short-term vs. long-term hormones comparison may have post-operative hormone therapy prior to randomisation but this must be discussed with the trial team.
19. Section 4.1 – 4 weeks changed to 30 days for clarity.
20. Section 4.1 – Clarification that bone scan is only required if Gleason score is  $\geq 8$  and post-operative PSA is detectable.
21. Section 5.1.1 – Clarification that RADICALS-RT randomisation should ideally be performed within 22 weeks of surgery.
22. Section 6.1 – Clarification that treatment section is guidance.
23. Section 6.2 – Clarification that treatment section is guidance.
24. Section 6.2.2 – Inclusion of degarelix as acceptable treatment in Canada.
25. Section 6.2.2.1 - Inclusion of degarelix as acceptable treatment in Canada.
26. Section 6.2.3 - Inclusion of degarelix as acceptable treatment in Canada.
27. Section 6.2.3.1 - Inclusion of degarelix as acceptable treatment in Canada.
28. Section 6.3 – Removal of progression whilst on therapy as a reason to stop trial treatments.
29. Section 6.7 – Addition of freedom from distant metastasis as a primary outcome measure.
30. Section 7.1 – Clarification that Comorbidity form (CRF2) should be completed two weeks prior to randomisation.
31. Section 7.2.2 – Addition of information about change of primary outcome measure for RADICALS-RT and clarification that bone scans are not mandated.
32. Section 9.1 – Addition of clarification that each comparison will have an independent randomisation programme.
33. Section 9.2.1 – Addition of information on new primary outcome measure for RADICALS-RT and reasons for change.
34. Section 9.2.3 – Addition of disease-specific survival as secondary outcome measure for RADICALS-RT only.
35. Section 9.3 – Updated information on sample size calculations for RADICALS-RT and RADICALS-HD and the comparisons in RADICALS-HD.
36. Section 9.5 – Statistical Analysis Plan information updated by moving information on planned comparisons in RADICALS-HD to new sections 9.3.3.1 and 9.3.3.2.
37. Section 9.6 – Addition of information on planned individual patient data meta-analyses.
38. Section 11.3 – CRF numbering corrected.
39. Section 15.3 – Updated information as IDMC has now been formed.

#### 14.1.6 AMENDMENTS MADE TO PROTOCOL VERSION 4.0 JUNE 2011

This document was created using the MRC CTU Protocol Template Version 4.0, and as a result there are major formatting changes. The rationale to adopt this protocol template is to keep in line with the current style of documentation as recommended by the MRC CTU Protocol Review Committee. 'At UCL' has been added throughout protocol to reflect the organisational change.

1. Page i – Wording updated to reflect use of new protocol template.
2. Page i – Compliance section updated.
3. Page ii – Authorisations and Approvals section included.
4. Page ii – Trial Registration section included.
5. Page iii – Date of Ethics Approval added.
6. Page iii – Typographical correction: Regulatory approval date corrected from 17<sup>th</sup> April to 27<sup>th</sup> April.
7. Page iii – Email address has been amended.
8. Page iii – MRC CTU staff details updated.
9. Page iv – NCIC CTG contact details updated.
10. Section 1.1.1 – Typographical correction: space added between RADICALS-HD and alone.
11. Section 1.1.3.2 -Figure 3: Clarification added.
12. Section 1.1.5 – Years of further Follow-up updated to 7 years.
13. Section 4 – Table 1: Additional heading added.
14. Section 4.1 – Tables 2a and 2b merged as one table.
15. Section 4.1 – Table 2b: 4 weeks changed to 30 days for clarity and timing added.
16. Section 5.1.2 – Reference to see figures 1-4 corrected to figures 1-3.
17. Section 6.1 – Use of IMRT information added.
18. Section 6.1.3.4 – Updated to allow for other appropriate dose schedules.
19. Section 6.2.2 – Degarelix removed as an option for Canadian patients.
20. Section 6.2.2.1 – Degarelix removed as an option for Canadian patients.
21. Section 6.2.3 – Degarelix removed as an option for Canadian patients.
22. Section 6.2.3.1 - Degarelix removed as an option for Canadian patients.
23. Section 7.1 – Table 5: Two weeks prior to randomisation replaced by Within two weeks prior to randomisation for clarity.
24. Section 7.1 – Table 5: Randomisation forms details amended for clarity.
25. Section 7.5 – Details of national registries updated.
26. Section 7.6 – Trial closure information updated with current template.
27. Section 8.2 – Patient transfer procedure updated.
28. Section 9.2.3 – Requirement of radiotherapy treatment planning data added to treatment toxicity.
29. Section 9.3.2 – Clarification of number of patients randomised per month.
30. Section 10.2 – Typographical correction: hyphen added between RADICALS and RT.
31. Section 10.2 – 'the protocol' removed from last paragraph.
32. Section 10.2 – Information about data collection for RTTQA added.
33. Section 11.2 – Typographical correction: full stop added to end of 4<sup>th</sup> paragraph.
34. Section 11.3.2 (D) – Reporting period amended from one working day to 24 hours.
35. Section 11.3.2 – Notification procedure: Reporting period amended from one working day to 24 hours.
36. Section 11.4 - Reporting period amended from one working day to 24 hours.
37. Section 11.4 – Figure 4: Reporting period amended from one working day to 24 hours.

#### 14.1.7 AMENDMENTS MADE TO PROTOCOL VERSION 5.0 MARCH 2014

1. Page i – Update to Canadian Sponsor name, Addition of information about sponsorship of the trial
2. Page ii – Update to MRC CTU address, update to MRC CTU staff
3. Page iii – Update to Canadian Sponsor name, update to CCTG staff

4. Section 1.1.3 – Update for Figure 1 and Figure 2
5. Section 1.1.4.A – Addition of ‘Freedom from biochemical progression’; Addition of ARTISTIC meta-analysis outcomes
6. Section 1.1.4.B – Addition of number of recruited patients
7. Section 1.1.5 – Update to trial duration
8. Section 1.1.7 – Clarification of samples to be collected
9. Section 2.3 – Change of Canadian sponsor name
10. Section 2.5.1 – Details of ARTISTIC meta-analysis
11. Section 3 – Addition of a Bullet Point for point 4
12. Section 5.2 - Update to Canadian Sponsor name
13. Section 6.1.1 – Addition of ‘entering into’ RADICALS-RT
14. Section 6.1.3.A – change Section 6.1.3.4 to Section 6.1.3.D
15. Section 7.2.2 – clarification of length of follow up
16. Section 7.5 – Addition of guidance for conducting visits with patients on long term follow-up
17. Section 7.5.1 – Addition of inclusion of ONS mortality data
18. Section 7.6 – Clarification of when trial closure will occur
19. Section 9.2.3 – Addition of ‘Freedom from distant metastasis (RADICALS-HD only); Addition of ‘Freedom from biochemical progression (RADICALS-RT only)
20. Section 9.2.4 – Addition of details of early reporting of biochemical outcomes
21. Section 9.6.1 – Update to the plans for ARTISTIC collaborative group
22. Section 10.5 – Addition of guidance for sites regarding protocol deviations
23. Section 11.3 – clarification of SAE reporting
24. Section 11.3.1 - clarification of adverse event reporting, update to link of CTCAE V3.0
25. Section 11.3.2.A – change Table 5 to Table 6
26. Section 11.3.2.C – Addition of how to find RSI for investigators, addition of responsibility of assigning expectedness
27. Section 11.3.2.D – Clarification of reporting timelines for SARs and SUSARs
28. Safety Reporting Flowchart – Updated
29. Section 12 – change website address

#### **14.1.8 AMENDMENTS MADE TO PROTOCOL VERSION 6.0 DECEMBER 2018**

Protocol v6.0 was updated to Protocol v7.0 using the MRC CTU Protocol Template v7.0 and as a result there are some changes to sections and formatting. The use of this template is recommended by the MRC CTU Protocol Review Committee.

1. Title page – Canadian Cancer Trials Group logo updated
2. Title page – CTA number changed (following change to UCL Sponsorship)
3. General Information – Revised wording regarding ICH-GCP added to Compliance section
4. General Information – Clarification added regarding UCL Sponsorship and CCTG responsibilities
5. General Information – Grant reference numbers added to Funding section
6. General Information – Revised wording added to Authorisations and Approvals section
7. General Information – Clinical Centres information added
8. Information for MRC Investigators – Changes made to trial contacts and contact details
9. Information for MRC Investigators – Randomisation contact details removed
10. Pages 5-6 - Freedom from distant metastasis and Metastasis free survival added to Abbreviations
11. Pages 7-9 – Trial Summary transcribed into table format, number of participants to be studied and trial duration added
12. Page 12 – Primary outcome for RADICALS-HD changed to Metastasis-free-survival (MFS)
13. Page 13 – Trial Duration – Updated wording added regarding change in primary outcome for RADICALS-HD

14. Page 22 – Randomisation Contacts 5.2 removed, wording added to confirm randomisation closed.
15. Pages 27-28 – Protocol Treatment Discontinuation 4.3 section and relevant wording added
16. Page 31 – Early Stopping of Follow Up 5.5 – section and relevant wording added
17. Pages 31-32 – Loss to Follow Up 5.6 – clarification regarding follow up data added
18. Page 33 – Withdrawal from the trial completely (previously 8.1) – section removed, clarified in sections 4.3 and 5.6
19. Page 33 – Trial Closure 7.9 retitled End of Trial
20. Page 34-35 – Statistical considerations 6.2.2 - Wording added to clarify change to primary outcome to MFS for RADICALS-HD
21. Page 37 – Statistical considerations 6.3.3.A – Updated power calculations added for RADICALS-HD: No-HT vs RT+STHT
22. Page 38 – Statistical considerations 8.3.3.B – Updated power calculations added for RADICALS-HD: RT vs STHT vs RT+LTHT
23. Page 40 - Source Data section 7.4 and relevant wording added
24. Page 42 – Safety Reporting – 8.1 – ‘Another important medical condition’ and definition added to Table 6
25. Page 43 - Safety Reporting – 8.2.1 – Definition of Investigational Medicinal Product added
26. Page 43 – Safety Reporting – 8.2.2 – Examples of adverse events added
27. Page 43 – Safety Reporting – Clarification added regarding reporting of disease-related and elective surgery events
28. Page 44 – Safety Reporting – 8.3.2 – Investigator responsibilities clarification wording added
29. Page 45 – Safety Reporting – 8.3.3.B – Updated SAE causality definitions Table (7) added
30. Page 45– Safety Reporting – 8.3.3.C – Minor changes made to wording regarding assessing SAE expectedness
31. Page 45 – Safety Reporting – 8.3.3.D – Clarification wording added to Notification
32. Page 46 – Safety Reporting – 10.3.3.E – Clarification wording added regarding minimum SAE reporting criteria
33. Page 46 – Safety Reporting – 8.4 – Clarification wording added to CTU Responsibilities
34. Page 48 – Safety Reporting Flow chart – clarification wording added regarding SAEs exempt from expedited reporting and SAE notification procedures

## **14.2 APPENDICES**

### **14.2.1 AMENDMENTS MADE TO APPENDIX A VERSION 1.0 MARCH 2007**

1. Section Av – Heading spelling corrected from GUIDENCE to GUIDANCE
2. Section Avii – Colleen Savage replaced as Trial Manager by Andrea Hiltz and Chris Morash replaced as Urologist by Fred Saad.

### **14.2.2 AMENDMENTS MADE TO APPENDIX B VERSION 1.0 MARCH 2007**

1. Section Bi – Model agreement for non-commercial research, GP letters and Accreditation Form I added to required documentation and requirements for radiotherapy quality assurance added.
2. Section Bii – Model agreement for non-commercial research added to contents of commitment form, telephone number updated and Investigators Statement, Contact Details Sheet and Delegation Log removed.
3. Section Biii – Radiotherapy quality assurance appendix added and numbering of subsequent sections changed.
4. Section Biv.2 – CTA reference added



#### **14.2.3 AMENDMENTS MADE TO APPENDIX A VERSION 1.0 JUNE 2007**

1. Section Av – Updated guidance flow diagram added
2. Section Avii – New trial committee members added

#### **14.2.4 AMENDMENTS MADE TO APPENDIX B VERSION 1.1 JUNE 2007**

1. Section Bii – Accreditation pack name changed to Site Specific Approval pack
2. Section Biii – Radiotherapy quality assurance guidance added
3. Section Bviii – Patient Information Sheet split into two sheets, one for patients entering both randomisations and one for the hormone duration randomisation only. Some minor wording changed and version changed to 3.0, January 2008
4. Section Bix – Consent Form split into two sheets, one for patients entering both randomisations and one for the hormone duration randomisation only. Consent statements added to clarify MRC CTU employees will have access to records, that name and NHS number will be taken and for participation in the quality of life study. Version changed to 2.0, January 2008.

#### **14.2.5 AMENDMENTS MADE TO APPENDIX A VERSION 2.0 JANUARY 2008**

1. Section Avi – Statement regarding non-participation of Canadian centres in the quality of life study removed.

#### **14.2.6 AMENDMENTS MADE TO APPENDIX A VERSION 2.2 DECEMBER 2008**

1. Section Ai – Addition of overall trial design figure.
2. Section Aiii – Removal of WHO performance status table as grading is not required for data collection.
3. Section Av – Updated flow diagram depicting criteria for suitable patients for each radiotherapy groups. This is reflected in the updated eligibility criteria in section 4 of the protocol.
4. Section Avii – Addition of Angela Lee to trial committee and Lindsey Masters replaced by Ben Spittle as Data Manager.

#### **14.2.7 AMENDMENTS MADE TO APPENDIX B VERSION 2.1 DECEMBER 2008**

1. Section Biv – Updated GP letters with amended wording and specification of which patient group each are applicable to. Version updated to v3.0.
2. Section Bv – SSA replaced with R&D approval.
3. Section Bviii – Patient Information Sheets amended to relate to each separate randomisation and introduction to section added.
4. Section Bix – Updated consent forms for each separate randomisation and introduction added.
5. Section Bix.2 – Removal of question 8 regarding quality of life study as this is not applicable to these patients.

#### **14.2.8 AMENDMENTS MADE TO APPENDIX A VERSION 3.0 OCTOBER 2009**

1. Section Av – Clarification of patient selection for RADICALS-RT
2. Section Av – Updated PSA value from >0.1 to >0.2.
3. Section Avi – Blank version number and date removed.
4. Section Avii – Trial Committee Members list updated

#### **14.2.9 AMENDMENTS MADE TO APPENDIX B VERSION 3.0 OCTOBER 2009**

1. Section Bii – MRC CTU address updated
2. Section Biii – MRC CTU address updated
3. Section Biv – Date and version of document added and date of letter space clarified.

4. Section Bviii – Date and version of patient information sheets updated.
5. Section Bviii – Information about sample size and recruiting countries updated.
6. Section Bix – Date and version of consent forms updated
7. Section Bix – Date and version of patient information sheets referred to updated.

#### **14.2.10 AMENDMENTS MADE TO APPENDIX A VERSION 4.0 JUNE 2011**

1. Section Aiii – Urethral stricture removed from the RTOG toxicity table
2. Section Avii – Trial Committee Members list updated

#### **17.2.11 Amendments made to Appendix B version 4.0 June 2011**

1. Section Bii – MRC CTU trial email address updated
2. Section Biv – Date and version of GP letters updated
3. Section Bvi – Insurance arrangements have changed
4. Section Bviii – Patient Information Sheets have been removed from this appendix and will be kept as a separate document
5. Section Bix – Consent Forms have been removed from this appendix and will be kept as a separate document

#### **14.2.11 AMENDMENTS MADE TO APPENDICES VERSION 5.0 MARCH 2014**

1. Appendix A, Section A VII – update of trial committee members
2. Appendix B, Section B II – update of MRC CTU contact address
3. Addition of Appendix C: Reference Safety Information

## 15 REFERENCES

1. Annual incidence of prostate cancer:  
<http://info.cancerresearchuk.org/cancerstats/types/prostate/>
2. Hospital Episode Statistics website: <http://www.hesonline.nhs.uk>
3. Jane Melia, Sue Moss, Louise Johns. Rates of prostate-specific antigen testing in general practice in England and Wales in asymptomatic and symptomatic patients: a cross-sectional study. *BJU International* 2005;94(1):51-6.
4. Atlas website: [www.ices.on.ca](http://www.ices.on.ca). 2005.
5. Stephenson AJ, Shariat SF, Zelefsky MJ, Kattan MW, Butler EB, Teh BS et al. Salvage radiotherapy for recurrent prostate cancer after radical prostatectomy. *JAMA* 2004;291(11):1325-32.
6. Anscher MS. Salvage radiotherapy for recurrent prostate cancer: the earlier the better. *JAMA* 2004;291(11):1380-2.
7. Weigel, T, Bottke, D, Willich, N, and et al. Phase III results of adjuvant radiotherapy (RT) versus "wait and see" (WS) in patients with pT3 prostate cancer following radical prostatectomy (RP). *Proc Am Soc Clin Oncol*. 2005.
8. Bolla M, Van Poppel H, Tombal B, Vekemans K, Da Pozzo L, De Reijke TM, Verbaeys A, Bosser JF, Van Velthoven R, Collette L. 10-year results of Adjuvant radiotherapy after radical prostatectomy in pT2N0 prostate cancer (EORTC 22911). *Proc 52nd Annual ASTRO Meeting 2010 Abs #62*
9. Bolla M, van Poppel H, Collette L, van Cangh P, Vekemans K, Da Pozzo L et al. Postoperative radiotherapy after radical prostatectomy: a randomised controlled trial (EORTC trial 22911). *Lancet* 2005;366(9485):524-5.
10. Thompson IM, Tangen CM, Paradelo J, Lucia MS, Miller G, Troyer D, Messing E, Forman J, Chin J, Swanson G, Canby-Hagino E, Crawford ED. Adjuvant radiotherapy for pathological T3N0M0 prostate cancer significantly reduces risk of metastases and improves survival: long-term followup of a randomized clinical trial. *J Urol* 2009; 181(3):956-62
11. Wiegel T, Bottke D, Steiner U, Siegmann A, Golz R, Störkel S, Willich N, Semjonow A, Souchon R, Stöckle M, Rube C, Weissbach L, Althaus P, Rebmann U, Kälble T, Feldmann HJ, Wirth M, Hinke A, Hinkelbein W, Miller K.J *Clin Oncol*. 2009 Jun 20;27(18):2924-30.
12. Morris SL, Parker C, Huddart R, Horwich A, Dearnaley D. Current opinion on adjuvant and salvage treatment after radical prostatectomy. *Clin.Oncol.(R.Coll.Radiol.)* 2004;16(4):277-82.
13. Lee LW, Clarke NW, Ramani VA, Cowan RA, Wylie JP, Logue JP. Adjuvant and salvage treatment after radical prostatectomy: current practice in the UK. *Prostate Cancer Prostatic.Dis.* 2005;8(3):229-34.
14. Bolla M, Collette L, Blank L, Warde P, Dubois JB, Mirimanoff RO et al. Long-term results with immediate androgen suppression and external irradiation in patients with locally advanced prostate cancer (an EORTC study): a phase III randomised trial. *Lancet* 2002;360(9327):103-6.
15. Pilepich MV, Winter K, John MJ, Mesic JB, Sause W, Rubin P et al. Phase III radiation therapy oncology group (RTOG) trial 86-10 of androgen deprivation adjuvant to definitive radiotherapy in locally advanced carcinoma of the prostate. *Int.J Radiat.Oncol.Biol.Phys.* 2001;50(5):1243-52.
16. Lawton CA, Winter K, Murray K, Machtay M, Mesic JB, Hanks GE et al. Updated results of the phase III Radiation Therapy Oncology Group (RTOG) trial 85-31 evaluating the potential benefit of androgen suppression following standard radiation therapy for unfavorable prognosis carcinoma of the prostate. *Int.J Radiat.Oncol.Biol.Phys.* 2001;49(4):937-46.
17. D'Amico A, Manola J, Loffredo M, Renshaw A, DellaCroce A, Kantoff P. 6-month androgen suppression plus radiation therapy vs radiation therapy alone for patients with clinically localized prostate cancer: a randomized controlled trial. *Journal of the American Medical Association* 2004;292(7):821-7.

18. Eulau SM, Tate DJ, Stamey TA, Bagshaw MA, Hancock SL. Effect of combined transient androgen deprivation and irradiation following radical prostatectomy for prostatic cancer. *Int.J Radiat.Oncol.Biol.Phys.* 1998;41(4):735-40.
19. King CR, Presti JC, Jr., Gill H, Brooks J, Hancock SL. Radiotherapy after radical prostatectomy: does transient androgen suppression improve outcomes? *Int.J Radiat.Oncol.Biol.Phys.* 2004;59(2):341-7.
20. Katz MS, Zelefsky MJ, Venkatraman ES, Fuks Z, Hummer A, Leibel SA. Predictors of biochemical outcome with salvage conformal radiotherapy after radical prostatectomy for prostate cancer. *J Clin.Oncol.* 2003;21(3):483-9.
21. RTOG Website. <http://www.rtog.org/members/protocols/96-01/96-01.pdf>. 2006.
22. Pilepich MV. Androgen suppression adjuvant to definitive radiotherapy in prostate carcinoma--long-term results of phase III RTOG 85-31. *Int J Radiat Oncol Biol Phys.* 2005;61(5):1285-90.
23. See W, Iversen P, Wirth M, McLeod D, Garside L, Morris T. Immediate treatment with bicalutamide 150mg as adjuvant therapy significantly reduces the risk of PSA progression in early prostate cancer. *Eur.Urol.* 2003;44(5):512-7.
24. Tyrrell CJ, 'Casodex' Early Prostate Cancer Trialists Group. Bicalutamide ('Casodex') 150 mg as adjuvant to radiotherapy in patients with localised or locally advanced prostate cancer: results from the randomised Early Prostate Cancer Programme. *Radiotherapy and Oncology* 2005;76(1):4-10.
25. Messing EM, Manola J, Sarosdy M, Wilding G, Crawford ED, Trump D. Immediate hormonal therapy compared with observation after radical prostatectomy and pelvic lymphadenectomy in men with node-positive prostate cancer. *N Engl J Med* 1999;341(24):1781-8.
26. Messing EM, Manola J, Yao J, Kiernan M, Crawford D, Wilding G et al. Immediate versus deferred androgen deprivation treatment in patients with node-positive prostate cancer after radical prostatectomy and pelvic lymphadenectomy. *Lancet Oncol.* 2006;7(6):472-9.
27. Hanks GE, Pajak TF, Porter A, Grignon D, Brereton H, Venkatesan V et al. Phase III trial of long-term adjuvant androgen deprivation after neoadjuvant hormonal cyto-reduction and radiotherapy in locally advanced carcinoma of the prostate: the Radiation Therapy Oncology Group Protocol 92-02. *J Clin.Oncol.* 2003;21(21):3972-8.
28. Denham JW, Steigler A, Lamb DS, Joseph D, Turner S, Matthews J, Atkinson C, North J, Christie D, Spry NA, Tai KH, Wynne C, D'Este C. Short-term neoadjuvant androgen deprivation and radiotherapy for locally advanced prostate cancer: 10-year data from the Trans-Tasman Radiation Oncology Group 96.01 randomised controlled trial. *Lancet Oncol* 2011;12(5):451-9.
29. Schwarz R, Rexer H. Radiotherapy versus radiotherapy plus hormone therapy in the case of isolated PSA increase after radical prostatectomy. A prospective multicenter Phase III study of the AUO (AP 26/99) and the ARO (00/01. *Urologe A.* 2004;43(2):194-6.
30. Yokomizo A, Kawamoto H, Nihei K, Ishizuka N, Kakehi Y, Tobisu K et al. Randomised controlled trial to evaluate radiotherapy +/- endocrine therapy versus endocrine therapy alone for PSA failure after radical prostatectomy: Japan Clinical Oncology Group Study JCOG 0401. *Jpn.J.Clin.Oncol.* 2005;35(1):34-6.
31. Barthel FM, Royston P, Babiker A. A menu-driven facility for complex sample size calculation in randomized controlled trials with a survival or a binary outcome. *The stata journal* 2005;5(1):123-9.
